# Supplementary material for: Dynamic Phosphoproteomic Profiling Identifies CK2 as a Critical Survival Kinase in Quiescent Breast Cancer Cells and a Therapeutic Target for Minimal Residual Disease
Source: Research Square preprint supplement (doi:10.21203/rs.3.rs-7287833/v1), 2025-08-20
Supplement: Supplementary file 1 [file 57282d11f4b725559a91727e.xlsx]

## Sheet: Sheet1 (4)
Differential site-specific phosphorylation during serum starvation-induced quiescence. Table lists proteins identified by mass spectrometry whose site-specific phosphorylation was significantly altered during serum starvation of cells compared to continuously growing controls. Each row corresponds to a unique phosphorylation site identified and mapped to a corresponding protein. Phosphosites with…
Gene	Protein	Positions	Fold change 48hrs serum starvation vs. continuously growing	p-value	Fold change 96hrs serum starvation vs. continuously growing	p-value
LMNB2	Lamin-B2	37	-10.9902	0.0516611	-62.6412	N/A
LMNB2	Lamin-B2	34	-10.9902	0.0516611	-62.6412	N/A
LUC7L	Putative RNA-binding protein Luc7-like 1	363	2.84134	0.0914082	-43.1674	N/A
RALY	RNA-binding protein Raly	295	1.01684	0.97397	-36.3388	N/A
NOC2L	Nucleolar complex protein 2 homolog	22	-15.0414	0.0810748	-34.0759	0.00174362
TCOF1	Treacle protein	875	-37.4097	0.00213996	-32.424	4.34853e-06
PROSER2	Proline and serine-rich protein 2	311	N/A	N/A	-29.8442	0.000308066
RRP9	U3 small nucleolar RNA-interacting protein 2	57	N/A	N/A	-26.6283	N/A
OSBPL8	Oxysterol-binding protein-related protein 8	798	-104.689	7.40444e-08	-25.87	5.28268e-07
OSBPL8	Oxysterol-binding protein-related protein 8	799	-104.689	7.40444e-08	-25.87	5.28268e-07
SRSF1	Serine/arginine-rich splicing factor 1	201	-6.31118	8.96499e-07	-25.5353	4.12269e-07
TCOF1	Treacle protein	868	-37.4097	0.00213996	-23.4953	3.1056e-06
TCOF1	Treacle protein	870	-37.4097	0.00213996	-23.4953	3.1056e-06
TCOF1	Treacle protein	871	-37.4097	0.00213996	-23.4953	3.1056e-06
TCOF1	Treacle protein	877	-37.4097	0.00213996	-23.4953	3.1056e-06
CTR9	RNA polymerase-associated protein CTR9 homolog	1015	-28.5766	9.96503e-05	-22.9535	1.37471e-06
CTR9	RNA polymerase-associated protein CTR9 homolog	1016	-28.5766	9.96503e-05	-22.9535	1.37471e-06
CTR9	RNA polymerase-associated protein CTR9 homolog	1017	-28.5766	9.96503e-05	-22.9535	1.37471e-06
CTR9	RNA polymerase-associated protein CTR9 homolog	1020	-28.5766	9.96503e-05	-22.9535	1.37471e-06
CTR9	RNA polymerase-associated protein CTR9 homolog	1021	-28.5766	9.96503e-05	-22.9535	1.37471e-06
PGM1	Phosphoglucomutase-1	117	-3.33214	0.262786	-22.764	0.00254738
NOC2L	Nucleolar complex protein 2 homolog	26	-6.89753	1.84614e-05	-22.6784	4.18324e-07
HERC4	Probable E3 ubiquitin-protein ligase HERC4	329	-2.80831	0.0895262	-22.0542	0.000341395
NOC2L	Nucleolar complex protein 2 homolog	32	-6.059	N/A	-20.9193	N/A
DDX21	Nucleolar RNA helicase 2	89	-4.29304	0.299705	-20.6011	2.23318e-07
SNX1	Sorting nexin-1	32	-1.86638	0.0302817	-19.7433	2.98491e-05
SNX1	Sorting nexin-1	39	-1.86638	0.0302817	-19.7433	2.98491e-05
SNX1	Sorting nexin-1	41	-1.86638	0.0302817	-19.7433	2.98491e-05
HMGA1	High mobility group protein HMG-I/HMG-Y	53	-3.84299	3.11229e-05	-18.9518	N/A
NOLC1	Nucleolar and coiled-body phosphoprotein 1	607	-4.08238	1.04459e-06	-18.7443	7.13373e-08
NOLC1	Nucleolar and coiled-body phosphoprotein 1	610	-4.08238	1.04459e-06	-18.7443	7.13373e-08
SAP30BP	SAP30-binding protein	18	-16.7109	0.00311209	-18.3974	0.00167699
SAP30BP	SAP30-binding protein	22	-16.1073	0.000206999	-17.7327	0.000168575
SAP30BP	SAP30-binding protein	33	-16.1073	0.000206999	-17.7327	0.000168575
HMGA1	High mobility group protein HMG-I/HMG-Y	36	-5.00382	5.57782e-06	-17.633	7.19147e-07
PLEC	Plectin	4382	-3.13499	0.00517029	-17.5756	6.52291e-08
NOC2L	Nucleolar complex protein 2 homolog	30	-11.0438	0.0585842	-17.5441	0.000909455
NOC2L	Nucleolar complex protein 2 homolog	28	-17.7648	0.0302182	-17.1853	0.000264632
EIF4EBP1	Eukaryotic translation initiation factor 4E-binding protein 1	77	N/A	N/A	-16.4467	N/A
EIF4EBP1	Eukaryotic translation initiation factor 4E-binding protein 1	82	N/A	N/A	-16.4467	N/A
HERC4	Probable E3 ubiquitin-protein ligase HERC4	317	1.80538	0.0245389	-15.885	4.41805e-05
HSF1	Heat shock factor protein 1	363	-2.30129	0.000854845	-15.8397	2.57355e-07
SGTA	Small glutamine-rich tetratricopeptide repeat-containing protein alpha	77	N/A	N/A	-15.3177	N/A
MAP4	Microtubule-associated protein 4	571	-2.04909	0.0075424	-14.9728	1.27868e-06
TOP2A	DNA topoisomerase 2-alpha	1351	1.19368	0.708036	-14.8809	N/A
INCENP	Inner centromere protein	214	-1.11293	0.261893	-14.7681	5.72553e-08
SRSF1	Serine/arginine-rich splicing factor 1	199	-2.38603	0.000436772	-14.4533	4.61538e-07
SRSF1	Serine/arginine-rich splicing factor 1	205	-2.38603	0.000436772	-14.4533	4.61538e-07
RANBP2	E3 SUMO-protein ligase RanBP2	2900	-6.04382	0.00200471	-14.3773	1.44827e-07
CASP4	Caspase-4;Caspase-4 subunit 1;Caspase-4 subunit 2	83	-5.9531	0.0153376	-14.2752	0.0176928
SRSF1	Serine/arginine-rich splicing factor 1	199	3.71306	3.52481e-05	-13.005	7.00984e-07
CAP1	Adenylyl cyclase-associated protein 1	310	-2.2319	0.0501452	-12.6729	6.2059e-06
INCENP	Inner centromere protein	142	-2.44421	N/A	-12.5811	N/A
SQSTM1	Sequestosome-1	355	-3.50538	4.37167e-07	-12.3503	0.0023285
SQSTM1	Sequestosome-1	361	-3.50538	4.37167e-07	-12.3503	0.0023285
SQSTM1	Sequestosome-1	366	-3.33993	1.27515e-06	-12.3503	0.0023285
HMGA1	High mobility group protein HMG-I/HMG-Y	99	-17.6964	0.00158039	-12.243	0.0733763
AGGF1	Angiogenic factor with G patch and FHA domains 1	7	-3.2395	1.89971e-05	-12.1082	3.25813e-08
AGGF1	Angiogenic factor with G patch and FHA domains 1	11	-3.2395	1.89971e-05	-12.1082	3.25813e-08
TOP2A	DNA topoisomerase 2-alpha	1392	-4.55768	1.49853e-06	-11.9804	3.26497e-06
TOP2A	DNA topoisomerase 2-alpha	1393	-4.55768	1.49853e-06	-11.9804	3.26497e-06
MAP1S	Microtubule-associated protein 1S;MAP1S heavy chain;MAP1S light chain	640	-2.39889	0.182721	-11.8823	0.000284852
MAP1S	Microtubule-associated protein 1S;MAP1S heavy chain;MAP1S light chain	638	-2.39889	0.182721	-11.8823	0.000284852
TOP2A	DNA topoisomerase 2-alpha	1391	-4.81094	0.000144141	-11.6482	N/A
AGGF1	Angiogenic factor with G patch and FHA domains 1	16	-3.47328	0.00799545	-11.6461	0.0012082
ZMYM4	Zinc finger MYM-type protein 4	118	-5.21993	N/A	-11.6412	N/A
MAP1B	Microtubule-associated protein 1B;MAP1B heavy chain;MAP1 light chain LC1	1322	-1.44599	0.0128282	-11.6079	N/A
MAP1B	Microtubule-associated protein 1B;MAP1B heavy chain;MAP1 light chain LC1	1339	-1.43299	0.0431977	-11.6079	N/A
ACIN1	Apoptotic chromatin condensation inducer in the nucleus	414	-4.00541	N/A	-11.5245	N/A
WDHD1	WD repeat and HMG-box DNA-binding protein 1	383	-2.21995	0.128627	-11.4557	3.49042e-06
AGGF1	Angiogenic factor with G patch and FHA domains 1	17	-16.3631	0.0212542	-11.4335	0.000232905
DDX21	Nucleolar RNA helicase 2	71	-1.27988	0.497335	-11.4069	N/A
HMGA1	High mobility group protein HMG-I/HMG-Y	103	-2.34801	0.143009	-11.3778	0.0282267
MAP1B	Microtubule-associated protein 1B;MAP1B heavy chain;MAP1 light chain LC1	561	-2.3286	0.352055	-11.3321	0.00273429
MKI67	Antigen KI-67	584	-1.44498	0.0690528	-11.1807	7.36635e-08
DDX24	ATP-dependent RNA helicase DDX24	94	1.64932	0.0488151	-10.9202	3.06643e-05
MAP1B	Microtubule-associated protein 1B;MAP1B heavy chain;MAP1 light chain LC1	1334	N/A	N/A	-10.8685	N/A
SRSF10	Serine/arginine-rich splicing factor 10	133	3.00297	0.00113954	-10.8066	6.23374e-08
SRSF10	Serine/arginine-rich splicing factor 10	131	3.00297	0.00113954	-10.8066	6.23374e-08
TOP2A	DNA topoisomerase 2-alpha	1213	-1.50747	0.000397943	-10.7356	N/A
BCLAF1	Bcl-2-associated transcription factor 1	531	1.95069	0.00454819	-10.6914	N/A
ESF1	ESF1 homolog	657	N/A	N/A	-10.578	N/A
ESF1	ESF1 homolog	663	N/A	N/A	-10.578	N/A
CD3EAP	DNA-directed RNA polymerase I subunit RPA34	136	-2.50724	3.17105e-05	-10.5772	6.8204e-10
MAP1B	Microtubule-associated protein 1B;MAP1B heavy chain;MAP1 light chain LC1	1312	-1.18751	N/A	-10.5207	N/A
INCENP	Inner centromere protein	263	-1.45827	0.0281166	-10.3251	N/A
NAB2	NGFI-A-binding protein 2	159	N/A	N/A	-10.2908	N/A
NAB2	NGFI-A-binding protein 2	162	N/A	N/A	-10.2908	N/A
IRS2	Insulin receptor substrate 2	560	1.63922	0.0101755	-10.2372	N/A
RAVER1	Ribonucleoprotein PTB-binding 1	14	1.50245	0.200744	-10.2264	0.0383616
CD3EAP	DNA-directed RNA polymerase I subunit RPA34	128	-2.40474	3.02778e-05	-10.0187	1.59569e-05
TOP2A	DNA topoisomerase 2-alpha	1247	-2.10986	0.0917271	-10.0178	1.3947e-06
CAP1	Adenylyl cyclase-associated protein 1	307	-1.91529	0.109825	-10.0178	6.38049e-05
PTPN2	Tyrosine-protein phosphatase non-receptor type 2	304	-2.17762	0.266068	-9.85189	4.89004e-05
TOMM70A	Mitochondrial import receptor subunit TOM70	91	1.5331	0.571056	-9.83292	0.100663
NOP14	Nucleolar protein 14	96	-1.27483	0.0680539	-9.59478	2.30426e-05
ERCC6L	DNA excision repair protein ERCC-6-like	1188	-2.41238	0.000131732	-9.56676	3.05582e-06
DLGAP5	Disks large-associated protein 5	662	-1.53535	0.00570305	-9.39361	1.65265e-06
FAM129B	Niban-like protein 1	665	-1.12177	0.403027	-9.3486	0.00448589
TXNIP	Thioredoxin-interacting protein	358	-2.12057	0.00952758	-9.32071	0.00145252
TXNIP	Thioredoxin-interacting protein	361	-2.12057	0.00952758	-9.32071	0.00145252
TXNIP	Thioredoxin-interacting protein	349	-2.09532	0.0481377	-9.32071	0.00145252
AHNAK	Neuroblast differentiation-associated protein AHNAK	5798	-1.78993	0.0143499	-9.21319	N/A
INCENP	Inner centromere protein	197	-1.45549	0.0205113	-9.18067	1.38548e-06
MAP7D1	MAP7 domain-containing protein 1	86	-3.72368	0.000259929	-9.13054	0.000687559
EIF5B	Eukaryotic translation initiation factor 5B	134	1.10582	0.515019	-9.11309	0.0881031
CCDC86	Coiled-coil domain-containing protein 86	58	-2.25557	6.58082e-05	-9.09655	9.72855e-08
CCDC86	Coiled-coil domain-containing protein 86	65	-2.25557	6.58082e-05	-9.09655	9.72855e-08
TPX2	Targeting protein for Xklp2	738	1.08363	0.460267	-9.02089	5.20233e-06
TOR4A	Torsin-4A	81	-4.11899	0.000337798	-9.01777	N/A
INCENP	Inner centromere protein	213	-1.36513	0.180838	-8.86119	0.000196134
RAD21	Double-strand-break repair protein rad21 homolog	153	-1.60339	0.00225144	-8.84272	8.07441e-07
RALY	RNA-binding protein Raly	295	-9.21574	0.0427253	-8.79412	0.0327311
MYBBP1A	Myb-binding protein 1A	1163	-1.7221	5.23934e-07	-8.77659	2.08081e-07
OGFR	Opioid growth factor receptor	315	1.40324	0.565504	-8.75532	0.00454082
EIF3D	Eukaryotic translation initiation factor 3 subunit D	528	1.00059	0.999068	-8.69279	0.131782
EIF3D	Eukaryotic translation initiation factor 3 subunit D	529	1.00059	0.999068	-8.69279	0.131782
ANLN	Actin-binding protein anillin	182	-1.51168	0.0562976	-8.67949	1.30403e-06
ANLN	Actin-binding protein anillin	194	-1.51168	0.0562976	-8.67949	1.30403e-06
IGF2R	Cation-independent mannose-6-phosphate receptor	2409	-2.14172	0.0225368	-8.63323	6.43962e-07
NUP153	Nuclear pore complex protein Nup153	614	N/A	N/A	-8.60688	7.90123e-07
NUP153	Nuclear pore complex protein Nup153	619	N/A	N/A	-8.60688	7.90123e-07
MARCKS	Myristoylated alanine-rich C-kinase substrate	26	1.43462	N/A	-8.57609	0.0323416
NAP1L4	Nucleosome assembly protein 1-like 4	5	-1.47902	0.0790897	-8.56658	9.66576e-07
RAB8A	Ras-related protein Rab-8A	185	3.29845	0.00994174	-8.55715	0.00271784
RTN4	Reticulon-4	15	-8.38593	0.123141	-8.53647	0.0669637
TCOF1	Treacle protein	156	1.12198	0.441077	-8.51555	0.00181713
UFM1	Ubiquitin-fold modifier 1	2	-1.00855	0.978713	-8.51449	N/A
UFM1	Ubiquitin-fold modifier 1	12	-1.00855	0.978713	-8.51449	N/A
UFM1	Ubiquitin-fold modifier 1	9	-1.00855	0.978713	-8.51449	N/A
UFM1	Ubiquitin-fold modifier 1	11	-1.00855	0.978713	-8.51449	N/A
DDX21	Nucleolar RNA helicase 2	121	-2.65443	0.00621649	-8.48986	5.55027e-07
MCM3	DNA replication licensing factor MCM3	708	2.21851	0.201257	-8.4318	N/A
ACBD3	Golgi resident protein GCP60	43	-2.78016	0.0404529	-8.40833	0.114139
MAP1B	Microtubule-associated protein 1B;MAP1B heavy chain;MAP1 light chain LC1	1298	1.06511	0.903825	-8.3179	N/A
NCAPD3	Condensin-2 complex subunit D3	1384	N/A	N/A	-8.25518	3.06785e-05
NONO	Non-POU domain-containing octamer-binding protein	450	-1.55148	0.0165122	-8.24329	2.06999e-06
TPR	Nucleoprotein TPR	2116	1.08283	0.695083	-8.19634	N/A
ELAC2	Zinc phosphodiesterase ELAC protein 2	213	-1.71538	N/A	-8.19083	0.010807
SMARCC1	SWI/SNF complex subunit SMARCC1	335	-3.58119	0.0106645	-8.16753	0.00934543
MKI67	Antigen KI-67	308	-1.78561	0.13132	-8.14831	2.2343e-06
MARCKS	Myristoylated alanine-rich C-kinase substrate	167	1.48397	0.0412168	-8.1271	9.62927e-08
LMNB1	Lamin-B1;Lamin-B2	391;405	-2.2948	0.000240827	-8.11854	3.97135e-07
LMNB1	Lamin-B1;Lamin-B2	393;407	-2.2948	0.000240827	-8.11854	3.97135e-07
NUCKS1	Nuclear ubiquitous casein and cyclin-dependent kinase substrate 1	181	-7.19064	0.00193753	-8.03651	9.02174e-08
NUCKS1	Nuclear ubiquitous casein and cyclin-dependent kinase substrate 1	179	-7.19064	0.00193753	-8.03651	9.02174e-08
INCENP	Inner centromere protein	219	-1.15795	0.137889	-8.00349	2.27556e-05
PTPN23	Tyrosine-protein phosphatase non-receptor type 23	1123	1.5967	0.315606	-8.00072	0.0524951
CCDC86	Coiled-coil domain-containing protein 86	66	-1.86625	N/A	-7.96862	0.00221541
NCAPD2	Condensin complex subunit 1	1366	-6.04168	0.0010567	-7.96073	3.98877e-05
NCAPD2	Condensin complex subunit 1	1367	-6.04168	0.0010567	-7.96073	3.98877e-05
NCAPD2	Condensin complex subunit 1	1370	-6.04168	0.0010567	-7.96073	3.98877e-05
NCAPD2	Condensin complex subunit 1	1371	-6.04168	0.0010567	-7.96073	3.98877e-05
PTGES3	Prostaglandin E synthase 3	124	-4.84202	0.000281811	-7.9383	9.14645e-08
PTGES3	Prostaglandin E synthase 3	148	-4.84202	0.000281811	-7.9383	9.14645e-08
PTGES3	Prostaglandin E synthase 3	151	-4.84202	0.000281811	-7.9383	9.14645e-08
SRSF10	Serine/arginine-rich splicing factor 10	133	1.98235	0.00661557	-7.9367	2.03888e-06
ANLN	Actin-binding protein anillin	561	-3.27885	0.00116106	-7.90881	N/A
BUB1	Mitotic checkpoint serine/threonine-protein kinase BUB1	655	-2.19762	0.0369896	-7.8973	N/A
BUB1	Mitotic checkpoint serine/threonine-protein kinase BUB1	661	-2.19762	0.0369896	-7.8973	N/A
INCENP	Inner centromere protein	148	-2.17904	0.000506193	-7.89511	2.37069e-07
TOP2A	DNA topoisomerase 2-alpha	1377	-1.11084	0.440934	-7.84906	5.08319e-06
SAP30	Histone deacetylase complex subunit SAP30	131	-2.06298	0.0813713	-7.83498	N/A
FTSJ3	pre-rRNA processing protein FTSJ3	347	-1.87532	0.027683	-7.82527	0.0636646
ZMYM4	Zinc finger MYM-type protein 4	122	-1.12039	0.804612	-7.78874	0.0587263
RB1	Retinoblastoma-associated protein	821	1.05651	0.637576	-7.77041	1.91556e-06
RB1	Retinoblastoma-associated protein	823	-1.3296	0.0358124	-7.7388	0.000275709
KPNA2	Importin subunit alpha-1	62	-1.68667	0.000778613	-7.71962	8.95412e-08
ILKAP	Integrin-linked kinase-associated serine/threonine phosphatase 2C	13	-2.15923	0.0566864	-7.68822	N/A
STMN1	Stathmin	16	-1.89143	0.00897847	-7.68524	2.07642e-07
STMN1	Stathmin	25	-1.89143	0.00897847	-7.68524	2.07642e-07
PGM2L1	Glucose 1,6-bisphosphate synthase	175	3.42917	0.111715	-7.58264	0.284371
MAP1B	Microtubule-associated protein 1B;MAP1B heavy chain;MAP1 light chain LC1	1322	N/A	N/A	-7.52786	N/A
MAP1B	Microtubule-associated protein 1B;MAP1B heavy chain;MAP1 light chain LC1	1339	N/A	N/A	-7.52786	N/A
KIFC1	Kinesin-like protein KIFC1	6	1.21137	0.15578	-7.51519	3.2191e-06
AHNAK	Neuroblast differentiation-associated protein AHNAK	5745	-17.0943	0.00856217	-7.46752	0.0332154
RPL14	60S ribosomal protein L14	139	1.14032	0.417317	-7.46426	0.00139734
DEK	Protein DEK	301	-4.17096	3.49442e-05	-7.45284	1.02426e-06
DEK	Protein DEK	303	-4.17096	3.49442e-05	-7.45284	1.02426e-06
DEK	Protein DEK	306	-4.17096	3.49442e-05	-7.45284	1.02426e-06
DEK	Protein DEK	307	-4.17096	3.49442e-05	-7.45284	1.02426e-06
NSRP1	Nuclear speckle splicing regulatory protein 1	33	-9.02965	2.30873e-05	-7.4468	1.21834e-06
MARCKS	Myristoylated alanine-rich C-kinase substrate	163	1.48397	0.0412168	-7.38603	N/A
PKN1	Serine/threonine-protein kinase N1	561	N/A	N/A	-7.31202	N/A
PKN1	Serine/threonine-protein kinase N1	562	N/A	N/A	-7.31202	N/A
ARFIP1	Arfaptin-1	76	N/A	N/A	-7.3064	N/A
SLTM	SAFB-like transcription modulator	1002	-1.66499	0.180405	-7.30579	0.180759
ARFIP1	Arfaptin-1	69	N/A	N/A	-7.27264	N/A
INCENP	Inner centromere protein	214	-2.11445	6.38383e-07	-7.25643	4.88931e-07
AHNAK	Neuroblast differentiation-associated protein AHNAK	5762	1.34941	0.203099	-7.24487	1.1796e-05
NGDN	Neuroguidin	142	-1.63601	0.005796	-7.23378	2.02153e-08
NGDN	Neuroguidin	143	-1.63601	0.005796	-7.23378	2.02153e-08
PKN1	Serine/threonine-protein kinase N1	562	-1.07075	0.653954	-7.2182	0.000375974
KMT2A	Histone-lysine N-methyltransferase 2A;MLL cleavage product N320;MLL cleavage product C180	3518	-3.01868	0.376696	-7.2152	0.124317
GTF2F1	General transcription factor IIF subunit 1	389	-1.91411	N/A	-7.11745	N/A
RIF1	Telomere-associated protein RIF1	2196	-2.34873	0.00171575	-7.1139	N/A
GATAD2A	Transcriptional repressor p66-alpha	113	-1.7562	N/A	-7.11212	N/A
INTS3	Integrator complex subunit 3	1012	-17.0712	1.24456e-05	-7.10833	9.79966e-05
INTS3	Integrator complex subunit 3	1014	-17.0712	1.24456e-05	-7.10833	9.79966e-05
INTS3	Integrator complex subunit 3	1015	-17.0712	1.24456e-05	-7.10833	9.79966e-05
INTS3	Integrator complex subunit 3	1016	-17.0712	1.24456e-05	-7.10833	9.79966e-05
INTS3	Integrator complex subunit 3	1018	-17.0712	1.24456e-05	-7.10833	9.79966e-05
EFHD2	EF-hand domain-containing protein D2	76	1.103	0.916946	-7.10793	0.00841043
BOD1L1	Biorientation of chromosomes in cell division protein 1-like 1	1531	N/A	N/A	-7.1	0.000326214
SRRM2	Serine/arginine repetitive matrix protein 2	1326	-2.66612	0.0103478	-7.08648	0.000119798
CTPS1	CTP synthase 1	574	-2.58206	0.0174238	-7.04471	0.000444866
MKI67	Antigen KI-67	579	-1.9838	0.0005334	-7.04295	4.23887e-05
MKI67	Antigen KI-67	584	-1.9838	0.0005334	-7.04295	4.23887e-05
MDC1	Mediator of DNA damage checkpoint protein 1	495	N/A	N/A	-7.00221	N/A
MDC1	Mediator of DNA damage checkpoint protein 1	498	N/A	N/A	-7.00221	N/A
MDC1	Mediator of DNA damage checkpoint protein 1	505	N/A	N/A	-7.00221	N/A
SDAD1	Protein SDA1 homolog	585	-2.53467	0.03184	-6.97102	5.31263e-06
INCENP	Inner centromere protein	218	-2.00389	0.0631544	-6.93218	0.00360591
TACC3	Transforming acidic coiled-coil-containing protein 3	317	-1.53536	0.00290737	-6.92488	4.85382e-05
LARP1	La-related protein 1	143	-1.72404	0.0634674	-6.90322	0.000185998
LIMCH1	LIM and calponin homology domains-containing protein 1	231	1.50893	0.491351	-6.90265	0.0252196
ANLN	Actin-binding protein anillin	54	1.1893	0.329421	-6.89414	2.47275e-06
MCM3	DNA replication licensing factor MCM3	713	-2.09332	0.0125556	-6.8896	0.130967
INCENP	Inner centromere protein	143	-2.24971	N/A	-6.87043	5.26429e-07
RRP1B	Ribosomal RNA processing protein 1 homolog B	732	-3.37068	0.0489256	-6.86196	0.000267833
MAP1B	Microtubule-associated protein 1B;MAP1B heavy chain;MAP1 light chain LC1	1152	-2.04164	0.595735	-6.86077	0.253189
CDK12	Cyclin-dependent kinase 12	341	-2.65213	0.000102745	-6.85126	1.8364e-08
CDK12	Cyclin-dependent kinase 12	343	-2.65213	0.000102745	-6.85126	1.8364e-08
CDK12	Cyclin-dependent kinase 12	345	-2.65213	0.000102745	-6.85126	1.8364e-08
SRRM2	Serine/arginine repetitive matrix protein 2	323	-1.21074	N/A	-6.84927	N/A
NUP153	Nuclear pore complex protein Nup153	330	-6.05434	N/A	-6.81924	N/A
HMGA1	High mobility group protein HMG-I/HMG-Y	49	-2.36443	0.282014	-6.81432	0.100714
TMPO	Lamina-associated polypeptide 2, isoform alpha;Thymopoietin;Thymopentin	351	-1.24466	0.758148	-6.81404	0.000200964
GTSE1	G2 and S phase-expressed protein 1	575	-1.81736	0.000205803	-6.77716	2.78983e-06
GTSE1	G2 and S phase-expressed protein 1	580	-1.81736	0.000205803	-6.77716	2.78983e-06
MYO9B	Unconventional myosin-IXb	1115	-1.35486	0.516528	-6.77401	0.00535424
PDXDC1	Pyridoxal-dependent decarboxylase domain-containing protein 1	718	-1.53892	0.0217001	-6.76327	8.01848e-05
AHNAK	Neuroblast differentiation-associated protein AHNAK	3360	1.52982	0.286785	-6.76322	0.00576197
MAVS	Mitochondrial antiviral-signaling protein	258	N/A	N/A	-6.762	N/A
RANBP2	E3 SUMO-protein ligase RanBP2;RanBP2-like and GRIP domain-containing protein 4	2276;1301	-1.5716	0.0687411	-6.72363	5.77267e-06
RANBP2	E3 SUMO-protein ligase RanBP2;RanBP2-like and GRIP domain-containing protein 4	2280;1305	-1.5716	0.0687411	-6.72363	5.77267e-06
CEP170	Centrosomal protein of 170 kDa;Cep170-like protein	1515;224	-1.04498	0.646384	-6.70896	1.18277e-07
FAM129A	Protein Niban	581	-2.39708	0.180022	-6.70023	0.00399032
MED1	Mediator of RNA polymerase II transcription subunit 1	1207	-1.98581	2.51964e-06	-6.68455	1.75884e-06
KIF23	Kinesin-like protein KIF23	867	-1.21634	0.55706	-6.68316	1.01744e-05
MAP4	Microtubule-associated protein 4	624	-2.26635	0.0177762	-6.67635	0.00143087
TOP2B	DNA topoisomerase 2-beta	1581	-2.32141	0.220966	-6.66997	N/A
C9orf40	Uncharacterized protein C9orf40	69	-1.49924	0.0542497	-6.65399	N/A
SON	Protein SON	1948	-1.21614	0.138542	-6.65122	N/A
SON	Protein SON	1950	-1.21614	0.138542	-6.65122	N/A
SON	Protein SON	1952	-1.21614	0.138542	-6.65122	N/A
YAP1	Transcriptional coactivator YAP1	110	4.08442	N/A	-6.62114	N/A
SNIP1	Smad nuclear-interacting protein 1	54	-4.66837	2.46417e-05	-6.59311	N/A
ANLN	Actin-binding protein anillin	792	1.04075	0.839575	-6.58293	0.00072854
CDCA8	Borealin	219	-1.48881	0.0238051	-6.53583	4.9571e-06
MAVS	Mitochondrial antiviral-signaling protein	253	-1.40614	0.0976362	-6.52515	N/A
NOP2	Probable 28S rRNA (cytosine(4447)-C(5))-methyltransferase	732	-1.54207	0.00470832	-6.51186	1.00985e-06
HMGA1	High mobility group protein HMG-I/HMG-Y	36	-4.91735	7.02055e-06	-6.48493	7.09112e-06
GAPVD1	GTPase-activating protein and VPS9 domain-containing protein 1	757	N/A	N/A	-6.45846	0.376474
YTHDC1	YTH domain-containing protein 1	320	-13.5383	N/A	-6.44495	0.00428583
YTHDC1	YTH domain-containing protein 1	308	-13.5383	N/A	-6.44495	0.00428583
YTHDC1	YTH domain-containing protein 1	318	-13.5383	N/A	-6.44495	0.00428583
MAP7D3	MAP7 domain-containing protein 3	461	-1.39624	0.0617419	-6.415	N/A
HLTF	Helicase-like transcription factor	397	-2.48913	0.00895848	-6.38519	1.5517e-06
HLTF	Helicase-like transcription factor	398	-2.48913	0.00895848	-6.38519	1.5517e-06
HLTF	Helicase-like transcription factor	400	-2.48913	0.00895848	-6.38519	1.5517e-06
PHF6	PHD finger protein 6	155	-1.36478	0.363242	-6.37865	2.1684e-06
SNIP1	Smad nuclear-interacting protein 1	52	-4.29057	0.000305983	-6.37816	N/A
SEC61B	Protein transport protein Sec61 subunit beta	17	-1.95768	0.0501064	-6.36063	2.25835e-05
NEDD4L	E3 ubiquitin-protein ligase NEDD4-like	448	N/A	N/A	-6.35957	N/A
NEDD4L	E3 ubiquitin-protein ligase NEDD4-like	449	N/A	N/A	-6.35957	N/A
MTCL1	Microtubule cross-linking factor 1	621	-1.42447	N/A	-6.33243	N/A
SCAMP3	Secretory carrier-associated membrane protein 3	32	-2.53921	0.247119	-6.29336	0.018096
DKC1	H/ACA ribonucleoprotein complex subunit 4	494	-1.0209	0.847412	-6.28939	0.0882985
TCOF1	Treacle protein	771	N/A	N/A	-6.28503	0.00495894
TCOF1	Treacle protein	769	N/A	N/A	-6.27954	0.00419876
INCENP	Inner centromere protein	197	-1.88435	5.18185e-06	-6.27776	8.28932e-07
AHNAK	Neuroblast differentiation-associated protein AHNAK	5865	8.32887	0.0210991	-6.26693	0.159564
HMGA1	High mobility group protein HMG-I/HMG-Y	53	-2.04428	3.55786e-05	-6.2485	1.72005e-07
CHAF1B	Chromatin assembly factor 1 subunit B	432	-1.80538	N/A	-6.24846	1.4023e-06
INCENP	Inner centromere protein	828	-2.15822	0.000240685	-6.23448	3.51956e-06
INCENP	Inner centromere protein	831	-2.15822	0.000240685	-6.23448	3.51956e-06
INCENP	Inner centromere protein	832	-2.15822	0.000240685	-6.23448	3.51956e-06
MED1	Mediator of RNA polymerase II transcription subunit 1	1215	-1.90506	0.000107976	-6.22481	8.36488e-05
HMGA1	High mobility group protein HMG-I/HMG-Y	44	-2.79527	0.032059	-6.20874	3.0432e-06
NDRG1	Protein NDRG1	330	1.87228	0.0307026	-6.19949	3.3833e-05
NDRG1	Protein NDRG1	333	2.00433	0.0319501	-6.19949	3.3833e-05
CCDC86	Coiled-coil domain-containing protein 86	102	-2.72722	0.00164119	-6.15641	5.93465e-06
CCDC86	Coiled-coil domain-containing protein 86	113	-2.72722	0.00164119	-6.15641	5.93465e-06
CCDC86	Coiled-coil domain-containing protein 86	110	-2.7245	0.00601647	-6.15027	4.93031e-05
NDRG1	Protein NDRG1	366	2.20093	0.180615	-6.13932	N/A
PXN	Paxillin	244	-2.3446	N/A	-6.11804	N/A
CHAF1B	Chromatin assembly factor 1 subunit B	429	-1.6835	8.4124e-05	-6.10825	1.88785e-07
TRERF1	Transcriptional-regulating factor 1	715	-2.66229	0.0132547	-6.08894	0.000338285
TRERF1	Transcriptional-regulating factor 1	709	-2.66229	0.0132547	-6.08894	0.000338285
CCDC86	Coiled-coil domain-containing protein 86	18	-1.06015	0.848812	-6.06669	2.61839e-07
ECM29	Proteasome-associated protein ECM29 homolog	830	-2.7747	0.00469593	-6.05212	0.0037271
DNMT1	DNA (cytosine-5)-methyltransferase 1	714	-1.04628	0.712416	-6.04688	9.31725e-07
TBC1D10B	TBC1 domain family member 10B	687	-1.77754	0.0831048	-6.04553	4.59121e-05
RCOR1	REST corepressor 1	260	-1.63222	0.374114	-6.03758	0.054825
INCENP	Inner centromere protein	306	-2.8852	1.68731e-05	-6.03381	6.3222e-05
LMNA	Prelamin-A/C;Lamin-A/C	22	-2.88478	0.000168005	-6.02992	6.60425e-08
LMNA	Prelamin-A/C;Lamin-A/C	19	-2.88478	0.000168005	-6.02992	6.60425e-08
HNRNPU	Heterogeneous nuclear ribonucleoprotein U	4	1.49623	0.293225	-6.02829	0.00218683
SRRM1	Serine/arginine repetitive matrix protein 1	713	-2.70023	0.133556	-6.02692	0.0306962
SRRM1	Serine/arginine repetitive matrix protein 1	715	-2.70023	0.133556	-6.02692	0.0306962
MYO9B	Unconventional myosin-IXb	1122	-1.37307	0.317019	-5.95565	0.000824305
PLEC	Plectin	4628	-1.30765	0.712359	-5.94361	0.150811
CHAF1B	Chromatin assembly factor 1 subunit B	538	-1.52929	0.00338144	-5.94003	4.59955e-06
EIF6	Eukaryotic translation initiation factor 6	239	-1.35225	0.0244258	-5.93867	6.06236e-05
MUS81	Crossover junction endonuclease MUS81	95	N/A	N/A	-5.90227	N/A
STUB1	E3 ubiquitin-protein ligase CHIP	19	-1.02415	0.951676	-5.89283	0.000875126
NOP2	Probable 28S rRNA (cytosine(4447)-C(5))-methyltransferase	786	-1.61857	0.0111694	-5.863	0.000135701
LIN54	Protein lin-54 homolog	310	-1.13772	0.445727	-5.83847	0.000700611
LIN54	Protein lin-54 homolog	314	-1.13772	0.445727	-5.83847	0.000700611
RB1	Retinoblastoma-associated protein	807	1.04724	0.749129	-5.81799	4.60436e-07
RB1	Retinoblastoma-associated protein	811	1.04724	0.749129	-5.81799	4.60436e-07
MAP4	Microtubule-associated protein 4	825	-1.47148	0.0356547	-5.81093	9.28641e-06
C17orf85	Uncharacterized protein C17orf85	609	N/A	N/A	-5.79268	0.00106371
C17orf85	Uncharacterized protein C17orf85	612	N/A	N/A	-5.79268	0.00106371
C17orf85	Uncharacterized protein C17orf85	613	N/A	N/A	-5.79268	0.00106371
C17orf85	Uncharacterized protein C17orf85	614	N/A	N/A	-5.79268	0.00106371
C17orf85	Uncharacterized protein C17orf85	616	N/A	N/A	-5.79268	0.00106371
MMTAG2	Multiple myeloma tumor-associated protein 2	217	N/A	N/A	-5.76883	N/A
EIF5B	Eukaryotic translation initiation factor 5B	107	-1.86456	0.157903	-5.76228	5.6332e-05
EIF5B	Eukaryotic translation initiation factor 5B	113	-1.86456	0.157903	-5.76228	5.6332e-05
C18orf25	Uncharacterized protein C18orf25	67	-3.46914	N/A	-5.75985	0.00143264
MDC1	Mediator of DNA damage checkpoint protein 1	376	-1.71641	0.534061	-5.72244	0.0189393
COPB2	Coatomer subunit beta'	859	-1.51059	0.479217	-5.71621	0.0220821
ELAC2	Zinc phosphodiesterase ELAC protein 2	208	-2.01464	0.0842766	-5.70035	0.00162219
RBM8A	RNA-binding protein 8A	24	-1.75514	0.0397079	-5.69853	1.17181e-07
SQSTM1	Sequestosome-1	272	-2.94974	2.74701e-07	-5.69849	4.49543e-06
U2AF2	Splicing factor U2AF 65 kDa subunit	79	2.86551	0.0509976	-5.6947	0.0158401
CDC26	Anaphase-promoting complex subunit CDC26	42	2.09811	0.154996	-5.69446	0.00518169
SLC1A5	Neutral amino acid transporter B(0)	535	-3.37124	0.000490621	-5.68693	3.41593e-06
INCENP	Inner centromere protein	421	-1.84326	0.00143451	-5.68638	6.79204e-05
HNRNPK	Heterogeneous nuclear ribonucleoprotein K	116	-2.69535	0.0248885	-5.68417	0.0190946
RALBP1	RalA-binding protein 1	48	-1.27249	0.523386	-5.6826	0.00172746
RALBP1	RalA-binding protein 1	62	-1.27249	0.523386	-5.6826	0.00172746
ZRANB2	Zinc finger Ran-binding domain-containing protein 2	153	-1.00618	0.984773	-5.67732	1.96219e-05
RREB1	Ras-responsive element-binding protein 1	1219	1.18398	0.30082	-5.66078	N/A
RREB1	Ras-responsive element-binding protein 1	1225	1.18398	0.30082	-5.66078	N/A
HNRNPD	Heterogeneous nuclear ribonucleoprotein D0	82	-62.9891	N/A	-5.65623	0.0459529
KAT7	Histone acetyltransferase KAT7	88	-1.90277	0.00483382	-5.6558	4.03137e-05
PARD3	Partitioning defective 3 homolog	144	1.5735	0.0248823	-5.64503	0.0158888
CCNE2	G1/S-specific cyclin-E2	21	-1.15889	0.453862	-5.6408	0.00146804
MARCKS	Myristoylated alanine-rich C-kinase substrate	27	1.84353	0.0876658	-5.63287	0.000911261
KIAA1143	Uncharacterized protein KIAA1143	50	-1.37713	0.435375	-5.62023	0.000266039
SCAF11	Protein SCAF11	614	-3.20417	N/A	-5.60825	N/A
FAM21A	WASH complex subunit FAM21A;WASH complex subunit FAM21C	498;498	-1.30221	0.140362	-5.59152	0.000544928
ZNF609	Zinc finger protein 609	576	-5.51435	0.000108752	-5.58904	7.225e-05
DTL	Denticleless protein homolog	512	N/A	N/A	-5.58126	0.000147527
DTL	Denticleless protein homolog	516	N/A	N/A	-5.58126	0.000147527
BABAM1	BRISC and BRCA1-A complex member 1	66	-3.49405	0.0291135	-5.57403	0.0140852
SIPA1	Signal-induced proliferation-associated protein 1	839	1.15022	0.6987	-5.54862	N/A
HNRNPU	Heterogeneous nuclear ribonucleoprotein U	59	-2.01358	0.176052	-5.51702	0.0264764
LARP4B	La-related protein 4B	524	-2.47902	0.00470814	-5.5085	N/A
FLNA	Filamin-A	1084	-1.67739	0.0103336	-5.4891	0.000162934
SRSF1	Serine/arginine-rich splicing factor 1	199	-2.04981	0.000205725	-5.48089	5.89846e-07
SRSF1	Serine/arginine-rich splicing factor 1	201	-2.04981	0.000205725	-5.48089	5.89846e-07
LIG1	DNA ligase 1	76	1.08479	0.761014	-5.47721	0.00183099
ELAC2	Zinc phosphodiesterase ELAC protein 2	212	-1.69585	N/A	-5.46079	0.00423283
MKI67	Antigen KI-67	357	-1.07369	0.534881	-5.4513	2.73345e-06
TOP2A	DNA topoisomerase 2-alpha	1377	-1.67022	0.0429661	-5.44231	7.60878e-05
C18orf25	Uncharacterized protein C18orf25	66	2.42059	0.355637	-5.43609	0.0400509
SLC17A5	Sialin	16	-1.05142	0.860701	-5.43251	0.111009
REPS1	RalBP1-associated Eps domain-containing protein 1	540	-2.13672	0.0558788	-5.40858	0.0209434
ATRX	Transcriptional regulator ATRX	1285	-1.43658	0.160524	-5.39839	8.60926e-05
ATRX	Transcriptional regulator ATRX	1286	-1.43658	0.160524	-5.39839	8.60926e-05
ATRX	Transcriptional regulator ATRX	1291	-1.43658	0.160524	-5.39839	8.60926e-05
ATRX	Transcriptional regulator ATRX	1292	-1.43658	0.160524	-5.39839	8.60926e-05
USP39	U4/U6.U5 tri-snRNP-associated protein 2	82	-1.08167	0.662292	-5.39682	0.00157895
JAG1	Protein jagged-1	1210	-2.94223	N/A	-5.39342	N/A
MAPK1IP1L	MAPK-interacting and spindle-stabilizing protein-like	15	-1.43882	0.00495009	-5.39144	5.46467e-08
LRRFIP2	Leucine-rich repeat flightless-interacting protein 2	331	N/A	N/A	-5.38565	N/A
C9orf78	Uncharacterized protein C9orf78	261	1.93864	0.0814851	-5.37789	0.00202371
LMNB1	Lamin-B1	20	-3.13529	8.15631e-05	-5.36449	5.76724e-07
TJP2	Tight junction protein ZO-2	130	-1.344	0.230873	-5.34745	1.46317e-06
STARD3NL	MLN64 N-terminal domain homolog	193	-1.60837	0.0183327	-5.34011	2.39871e-05
TUBA1C	Tubulin alpha-1C chain;Tubulin alpha-1B chain;Tubulin alpha-1A chain;Tubulin alpha-3E chain	48;48;48;48;48;48	-1.05569	0.551749	-5.33945	7.18471e-06
KIAA1671	Uncharacterized protein KIAA1671	1059	-5.52161	0.0015816	-5.32178	0.00716983
LMNB1	Lamin-B1	23	-3.13529	8.15631e-05	-5.32071	4.76476e-06
SPEN	Msx2-interacting protein	2126	-1.04491	0.883827	-5.3167	8.35159e-05
REPS1	RalBP1-associated Eps domain-containing protein 1	537	-2.09462	0.0603342	-5.30205	0.0213789
SP100	Nuclear autoantigen Sp-100	157	1.24504	0.300465	-5.29926	0.000315746
ATP2B1	Plasma membrane calcium-transporting ATPase 1	1178	-2.42251	0.301624	-5.29849	0.0124537
ATP2B1	Plasma membrane calcium-transporting ATPase 1	1182	-2.42251	0.301624	-5.29849	0.0124537
EIF4EBP1	Eukaryotic translation initiation factor 4E-binding protein 1	70	N/A	N/A	-5.29144	0.0134852
LRRFIP1	Leucine-rich repeat flightless-interacting protein 1	714	-1.71424	0.000313948	-5.27602	1.23092e-05
LIMA1	LIM domain and actin-binding protein 1	362	1.36355	0.304643	-5.26831	0.000556092
SF3B2	Splicing factor 3B subunit 2	303	N/A	N/A	-5.26663	0.00065241
RB1	Retinoblastoma-associated protein	794	-2.69079	0.225287	-5.2605	1.96623e-05
STMN1	Stathmin	38	-1.15819	0.242962	-5.25005	2.70263e-05
DDX46	Probable ATP-dependent RNA helicase DDX46	294	-8.06184	0.0370057	-5.23526	N/A
DDX24	ATP-dependent RNA helicase DDX24	82	-1.15247	0.12233	-5.22387	3.2329e-06
EPHA2	Ephrin type-A receptor 2	899	-4.92059	0.0211818	-5.22105	0.00145543
EPHA2	Ephrin type-A receptor 2	901	-4.92059	0.0211818	-5.22105	0.00145543
EPHA2	Ephrin type-A receptor 2	897	-4.92059	0.0211818	-5.22105	0.00145543
SPEN	Msx2-interacting protein	2120	-1.02392	0.928497	-5.20992	1.61618e-05
RB1	Retinoblastoma-associated protein	788	-2.69079	0.225287	-5.20035	3.23127e-06
TOP2B	DNA topoisomerase 2-beta	1522	-3.73467	0.00141794	-5.19423	3.84828e-07
TOP2B	DNA topoisomerase 2-beta	1524	-3.73467	0.00141794	-5.19423	3.84828e-07
TOP2B	DNA topoisomerase 2-beta	1526	-3.73467	0.00141794	-5.19423	3.84828e-07
TBC1D10B	TBC1 domain family member 10B	707	-1.61155	0.220538	-5.19002	N/A
IRF2BP2	Interferon regulatory factor 2-binding protein 2	360	1.88058	0.0451054	-5.18988	0.0300853
SPIRE1	Protein spire homolog 1	467	-3.99523	0.0580208	-5.17461	0.0477547
SRRM1	Serine/arginine repetitive matrix protein 1	260	-1.6799	0.208491	-5.16343	2.77174e-06
SMARCC1	SWI/SNF complex subunit SMARCC1	328	-4.01753	0.000824022	-5.13847	2.30596e-05
SMARCC1	SWI/SNF complex subunit SMARCC1	330	-4.01753	0.000824022	-5.13847	2.30596e-05
SRRM2	Serine/arginine repetitive matrix protein 2	2071	-2.42906	0.000461781	-5.1097	9.60291e-06
SRRM2	Serine/arginine repetitive matrix protein 2	2069	-2.42906	0.000461781	-5.1097	9.60291e-06
YTHDC1	YTH domain-containing protein 1	315	-13.5383	N/A	-5.10411	0.0105944
YTHDC1	YTH domain-containing protein 1	317	-13.5383	N/A	-5.10411	0.0105944
CCDC86	Coiled-coil domain-containing protein 86	110	-1.7012	0.289707	-5.07951	0.000412262
GIT2	ARF GTPase-activating protein GIT2	415	-2.61058	0.233032	-5.07916	N/A
ERCC5	DNA repair protein complementing XP-G cells	355	-1.98249	0.00020829	-5.06654	5.46952e-05
ERCC5	DNA repair protein complementing XP-G cells	356	-1.98249	0.00020829	-5.06654	5.46952e-05
ERCC5	DNA repair protein complementing XP-G cells	357	-1.98249	0.00020829	-5.06654	5.46952e-05
NUMA1	Nuclear mitotic apparatus protein 1	2000	-1.23297	0.590723	-5.06348	N/A
DDX24	ATP-dependent RNA helicase DDX24	94	-1.12804	0.222154	-5.05976	0.000122979
SEC16A	Protein transport protein Sec16A	592	-3.8855	0.0280267	-5.05205	0.0304364
TCOF1	Treacle protein	171	-1.2718	0.197783	-5.03025	0.0124986
TCOF1	Treacle protein	173	-1.2718	0.197783	-5.03025	0.0124986
CCDC9	Coiled-coil domain-containing protein 9	385	N/A	N/A	-5.02812	N/A
IGF2R	Cation-independent mannose-6-phosphate receptor	2415	-2.77918	0.000112566	-5.00677	0.000828723
MMTAG2	Multiple myeloma tumor-associated protein 2	216	1.396	N/A	-5.00105	N/A
FAM122A	Protein FAM122A	37	-1.66607	0.240644	-4.9872	3.56426e-05
NES	Nestin	1489	-12.7107	N/A	-4.96158	0.148579
NES	Nestin	1496	-12.7107	N/A	-4.96158	0.148579
NES	Nestin	1498	-12.7107	N/A	-4.96158	0.148579
YY1	Transcriptional repressor protein YY1	247	-1.51247	0.0712969	-4.91823	2.79684e-07
TMPO	Lamina-associated polypeptide 2, isoform alpha;Thymopoietin;Thymopentin	74	-1.03813	0.837777	-4.9037	0.00025137
LARP7	La-related protein 7	261	-1.30132	0.62235	-4.90281	0.0373034
HMGA1	High mobility group protein HMG-I/HMG-Y	44	-1.49068	0.0919571	-4.90081	0.00338569
SUV39H2	Histone-lysine N-methyltransferase SUV39H2	381	N/A	N/A	-4.89701	1.03648e-05
SUV39H2	Histone-lysine N-methyltransferase SUV39H2	384	N/A	N/A	-4.89701	1.03648e-05
SERINC1	Serine incorporator 1	361	1.8336	N/A	-4.89541	N/A
C18orf25	Uncharacterized protein C18orf25	66	-1.0775	0.71714	-4.89209	6.35241e-05
ASAP1	Arf-GAP with SH3 domain, ANK repeat and PH domain-containing protein 1	717	-1.11727	0.670317	-4.89056	4.27709e-05
ASAP1	Arf-GAP with SH3 domain, ANK repeat and PH domain-containing protein 1	726	-1.11727	0.670317	-4.89056	4.27709e-05
NAP1L4	Nucleosome assembly protein 1-like 4	7	1.00226	0.990382	-4.86301	0.000160813
HUWE1	E3 ubiquitin-protein ligase HUWE1	1368	-1.21011	0.18899	-4.85998	N/A
PRPSAP2	Phosphoribosyl pyrophosphate synthase-associated protein 2	227	-1.34988	N/A	-4.85412	0.0277848
RABL6	Rab-like protein 6	468	N/A	N/A	-4.84169	N/A
AKAP2	A-kinase anchor protein 2	393	1.18273	0.554315	-4.84078	0.000922052
ITGA5	Integrin alpha-5;Integrin alpha-5 heavy chain;Integrin alpha-5 light chain	127	-1.35829	0.149009	-4.82042	1.51383e-07
CCDC86	Coiled-coil domain-containing protein 86	102	-1.29128	0.444599	-4.81114	1.31913e-06
ZC3H11A	Zinc finger CCCH domain-containing protein 11A	762;763;763;763	-2.93248	N/A	-4.80261	N/A
VCPIP1	Deubiquitinating protein VCIP135	757	-1.87565	0.000729146	-4.78882	N/A
VCPIP1	Deubiquitinating protein VCIP135	761	-2.08698	0.000853692	-4.78882	N/A
ADRB2	Beta-2 adrenergic receptor	246	1.33419	0.270092	-4.78013	0.000137123
MAP1S	Microtubule-associated protein 1S;MAP1S heavy chain;MAP1S light chain	655	-2.09188	0.000344175	-4.77751	0.000106031
SRRM2	Serine/arginine repetitive matrix protein 2	449	-5.2346	4.81119e-06	-4.77735	N/A
MAK16	Protein MAK16 homolog	202	N/A	N/A	-4.76534	0.00861641
AHNAK	Neuroblast differentiation-associated protein AHNAK	41	-1.30037	0.0242545	-4.7627	5.32693e-05
SNTB1	Beta-1-syntrophin	87	1.86502	0.0186987	-4.76023	0.077639
ABCC1	Multidrug resistance-associated protein 1	915	N/A	N/A	-4.74606	0.0223298
TRERF1	Transcriptional-regulating factor 1	743	-3.04434	0.0488307	-4.74109	0.0168084
TRERF1	Transcriptional-regulating factor 1	746	-3.04434	0.0488307	-4.74109	0.0168084
TOR1AIP1	Torsin-1A-interacting protein 1	315	N/A	N/A	-4.73246	0.00546979
LARP7	La-related protein 7	257	-1.09803	0.381301	-4.73147	0.177312
SRRM2	Serine/arginine repetitive matrix protein 2	2104	-1.27155	0.234829	-4.72315	0.000520878
PHAX	Phosphorylated adapter RNA export protein	350	N/A	N/A	-4.7154	0.00012601
PHAX	Phosphorylated adapter RNA export protein	356	N/A	N/A	-4.7154	0.00012601
PHAX	Phosphorylated adapter RNA export protein	349	N/A	N/A	-4.7154	0.00012601
PHAX	Phosphorylated adapter RNA export protein	358	N/A	N/A	-4.7154	0.00012601
EIF2S2	Eukaryotic translation initiation factor 2 subunit 2	105	-1.55094	0.0559734	-4.70482	9.98375e-05
PTPN12	Tyrosine-protein phosphatase non-receptor type 12	509	N/A	N/A	-4.70407	2.84832e-05
PTPN12	Tyrosine-protein phosphatase non-receptor type 12	519	N/A	N/A	-4.70407	2.84832e-05
C18orf25	Uncharacterized protein C18orf25	69	-1.309	0.439633	-4.69879	0.000290452
FOXK1	Forkhead box protein K1	213	-1.3873	0.0568111	-4.69853	1.29639e-06
FOXK1	Forkhead box protein K1	223	-1.3873	0.0568111	-4.69853	1.29639e-06
ARFIP1	Arfaptin-1	81	-1.41189	0.0324175	-4.69824	0.0003076
PDS5B	Sister chromatid cohesion protein PDS5 homolog B	1283	-1.37602	0.415713	-4.69466	7.75822e-06
RRBP1	Ribosome-binding protein 1	615	-2.53306	3.46752e-05	-4.69215	3.34093e-06
NFATC2IP	NFATC2-interacting protein	204	-2.07704	0.0284473	-4.6891	N/A
ANLN	Actin-binding protein anillin	182	-1.22168	0.365624	-4.68747	N/A
ANKRD17	Ankyrin repeat domain-containing protein 17	19	-2.82878	4.72313e-05	-4.68585	N/A
CCNL1	Cyclin-L1	342	-1.82421	N/A	-4.68348	N/A
NDE1	Nuclear distribution protein nudE homolog 1	211	-2.10128	N/A	-4.67475	0.000148111
SRRM2	Serine/arginine repetitive matrix protein 2	983	-1.38965	N/A	-4.66663	N/A
SRRM1	Serine/arginine repetitive matrix protein 1	583	-1.17132	0.671904	-4.66527	0.0753814
SRRM1	Serine/arginine repetitive matrix protein 1	581	-1.17132	0.671904	-4.66527	0.0753814
SCRIB	Protein scribble homolog	1547	1.76039	0.411387	-4.66155	0.220221
XRCC4	DNA repair protein XRCC4	327	1.23693	0.32254	-4.63606	0.041665
XRCC4	DNA repair protein XRCC4	328	1.23693	0.32254	-4.63606	0.041665
DMAP1	DNA methyltransferase 1-associated protein 1	448	N/A	N/A	-4.62175	N/A
RB1	Retinoblastoma-associated protein	37	-1.48588	0.0111017	-4.61356	3.97054e-06
SH3BP5L	SH3 domain-binding protein 5-like	362	2.23549	0.0842127	-4.61333	0.0430974
CLNS1A	Methylosome subunit pICln	102	1.20039	0.537132	-4.60991	2.51693e-05
CTR9	RNA polymerase-associated protein CTR9 homolog	925	-2.00025	0.0753428	-4.59935	4.40821e-05
EIF4G1	Eukaryotic translation initiation factor 4 gamma 1	1187	2.3294	0.0768686	-4.59651	N/A
EIF4EBP1	Eukaryotic translation initiation factor 4E-binding protein 1	68	-1.37634	0.656213	-4.58849	N/A
MAP3K2	Mitogen-activated protein kinase kinase kinase 2	164	-2.12949	0.327548	-4.57693	N/A
RALBP1	RalA-binding protein 1	34	-2.31238	0.031082	-4.55765	3.1445e-06
AHCTF1	Protein ELYS	1222	-15.3132	1.09456e-06	-4.55231	0.00163131
AHCTF1	Protein ELYS	1214	-15.3132	1.09456e-06	-4.55231	0.00163131
KIF4A	Chromosome-associated kinesin KIF4A;Chromosome-associated kinesin KIF4B	394;394	N/A	N/A	-4.54664	0.000132142
MLLT3	Protein AF-9	483	-1.7551	0.630206	-4.54475	0.000201869
SURF2	Surfeit locus protein 2	190	1.06986	0.733921	-4.53163	0.00711132
SMC4	Structural maintenance of chromosomes protein 4	22	-1.68254	0.0768064	-4.52752	4.19639e-05
NDE1	Nuclear distribution protein nudE homolog 1	214	-2.03418	N/A	-4.52551	0.000645071
SEC61B	Protein transport protein Sec61 subunit beta	19	2.7185	N/A	-4.52369	N/A
RBM39	RNA-binding protein 39	136	-1.20004	0.745011	-4.51692	8.61759e-05
ABCC1	Multidrug resistance-associated protein 1	919	N/A	N/A	-4.51501	0.0519438
TCOF1	Treacle protein	270	-6.71143	5.91055e-06	-4.51138	0.00017044
TCOF1	Treacle protein	272	-6.71143	5.91055e-06	-4.51138	0.00017044
TCOF1	Treacle protein	273	-6.71143	5.91055e-06	-4.51138	0.00017044
TCOF1	Treacle protein	277	-6.71143	5.91055e-06	-4.51138	0.00017044
TCOF1	Treacle protein	279	-6.71143	5.91055e-06	-4.51138	0.00017044
CDK1	Cyclin-dependent kinase 1;Cyclin-dependent kinase 2;Cyclin-dependent kinase 3	14;14;14	-1.23202	0.0214504	-4.49073	4.01918e-07
CDK2	Cyclin-dependent kinase 1;Cyclin-dependent kinase 2;Cyclin-dependent kinase 3	15;15;15	-1.23202	0.0214504	-4.49073	4.01918e-07
HJURP	Holliday junction recognition protein	473	1.2828	0.13074	-4.48986	2.84734e-05
SGOL1	Shugoshin-like 1	256	-1.15443	0.170354	-4.48672	1.3362e-07
PLEC	Plectin	1435	-1.30147	0.0118144	-4.48482	0.000188101
EIF3C	Eukaryotic translation initiation factor 3 subunit C;Eukaryotic translation initiation factor 3 subunit C-like protein	178;178	-1.89161	0.0742986	-4.48389	0.15999
EIF3C	Eukaryotic translation initiation factor 3 subunit C;Eukaryotic translation initiation factor 3 subunit C-like protein	181;181	-1.89161	0.0742986	-4.48389	0.15999
EIF3C	Eukaryotic translation initiation factor 3 subunit C;Eukaryotic translation initiation factor 3 subunit C-like protein	182;182	-1.89161	0.0742986	-4.48389	0.15999
EIF3C	Eukaryotic translation initiation factor 3 subunit C;Eukaryotic translation initiation factor 3 subunit C-like protein	166;166	-1.89161	0.0742986	-4.48389	0.15999
WAPAL	Wings apart-like protein homolog	221	-1.89035	0.00593973	-4.48289	1.02678e-05
WAPAL	Wings apart-like protein homolog	226	-1.89035	0.00593973	-4.48289	1.02678e-05
CDC23	Cell division cycle protein 23 homolog	588	-8.49097	N/A	-4.48233	N/A
CDC23	Cell division cycle protein 23 homolog	596	-8.49097	N/A	-4.48233	N/A
CMTR1	Cap-specific mRNA (nucleoside-2'-O-)-methyltransferase 1	31	1.02715	0.935165	-4.46488	0.00169036
PLEKHF1	Pleckstrin homology domain-containing family F member 1	227	1.14358	0.553451	-4.46079	5.79244e-05
TPR	Nucleoprotein TPR	2155	1.69185	0.0942027	-4.44588	4.86656e-05
NCL	Nucleolin	41	-2.90712	4.23397e-05	-4.44373	3.6084e-05
NCL	Nucleolin	42	-2.90712	4.23397e-05	-4.44373	3.6084e-05
FTSJ3	pre-rRNA processing protein FTSJ3	335	-2.48325	0.011135	-4.44308	0.0196909
FTSJ3	pre-rRNA processing protein FTSJ3	336	-2.48325	0.011135	-4.44308	0.0196909
FAM129B	Niban-like protein 1	665	-1.53026	0.000757066	-4.44031	2.21077e-06
FAM129B	Niban-like protein 1	681	-1.53026	0.000757066	-4.44031	2.21077e-06
OSBPL8	Oxysterol-binding protein-related protein 8	814	N/A	N/A	-4.4364	0.00119518
KPNA6	Importin subunit alpha-7	6	1.11948	0.161067	-4.43256	7.59809e-07
SRRM1	Serine/arginine repetitive matrix protein 1	750	-3.99482	N/A	-4.42436	0.000696599
RALBP1	RalA-binding protein 1	29	-2.33314	0.0762564	-4.41805	1.95433e-05
ZNF609	Zinc finger protein 609	581	-4.35599	N/A	-4.41499	N/A
MAP1S	Microtubule-associated protein 1S;MAP1S heavy chain;MAP1S light chain	657	-1.93205	0.0196761	-4.41245	0.014475
DDX47	Probable ATP-dependent RNA helicase DDX47	9	N/A	N/A	-4.40808	0.000861973
ANLN	Actin-binding protein anillin	323	1.00951	0.937361	-4.40118	N/A
THRAP3	Thyroid hormone receptor-associated protein 3	248	-1.13783	0.78142	-4.38653	0.000166683
THRAP3	Thyroid hormone receptor-associated protein 3	253	-1.13783	0.78142	-4.38653	0.000166683
UCHL3	Ubiquitin carboxyl-terminal hydrolase isozyme L3	130	-1.22476	0.347846	-4.38586	0.000553916
CCDC86	Coiled-coil domain-containing protein 86	80	-1.74906	0.000157205	-4.34935	4.03945e-08
CCDC86	Coiled-coil domain-containing protein 86	91	-1.74906	0.000157205	-4.34935	4.03945e-08
SKA3	Spindle and kinetochore-associated protein 3	155	-1.14793	0.376054	-4.34595	2.79103e-05
PHACTR4	Phosphatase and actin regulator 4	344	-1.2998	0.102193	-4.34486	0.000162251
KDM2A	Lysine-specific demethylase 2A	869	1.08407	0.74918	-4.34284	0.00018484
DKC1	H/ACA ribonucleoprotein complex subunit 4	451	-1.82247	0.152922	-4.33995	1.75028e-05
DKC1	H/ACA ribonucleoprotein complex subunit 4	453	-1.82247	0.152922	-4.33995	1.75028e-05
ZC3H18	Zinc finger CCCH domain-containing protein 18	796	-1.26691	0.136458	-4.33812	N/A
FMNL1	Formin-like protein 1	1031	-1.7979	0.0419832	-4.33256	4.85274e-05
FMNL1	Formin-like protein 1	1020	-1.7979	0.0419832	-4.33256	4.85274e-05
SLC31A2	Probable low affinity copper uptake protein 2	74	-1.39241	0.552709	-4.32467	0.125616
SLC31A2	Probable low affinity copper uptake protein 2	77	-1.31714	N/A	-4.32467	0.125616
FAM129A	Protein Niban	579	-1.40259	0.340917	-4.32089	0.00186661
SRCAP	Helicase SRCAP	3016	1.51315	0.0340675	-4.32006	0.00272008
SLC25A11	Mitochondrial 2-oxoglutarate/malate carrier protein	64	1.06868	0.508737	-4.30335	7.97027e-06
SLC25A11	Mitochondrial 2-oxoglutarate/malate carrier protein	70	1.06868	0.508737	-4.30335	7.97027e-06
SLC25A11	Mitochondrial 2-oxoglutarate/malate carrier protein	63	1.06868	0.508737	-4.30335	7.97027e-06
SLC25A11	Mitochondrial 2-oxoglutarate/malate carrier protein	69	1.06868	0.508737	-4.30335	7.97027e-06
STIM1	Stromal interaction molecule 1	668	-4.12316	N/A	-4.3032	0.00109821
FAM129A	Protein Niban	646	-1.08061	0.617366	-4.30248	N/A
MAP1B	Microtubule-associated protein 1B;MAP1B heavy chain;MAP1 light chain LC1	541	-1.17082	0.671517	-4.30159	0.0225496
PHACTR4	Phosphatase and actin regulator 4	358	-1.69497	0.0410225	-4.29697	0.000616644
NOL8	Nucleolar protein 8	890	-2.05436	0.000141433	-4.29259	1.51608e-05
NOL8	Nucleolar protein 8	888	-2.05436	0.000141433	-4.29259	1.51608e-05
WRNIP1	ATPase WRNIP1	153	N/A	N/A	-4.27804	0.145942
BUD13	BUD13 homolog	197	-1.66885	0.0249798	-4.27706	0.000146443
BUD13	BUD13 homolog	201	-1.66885	0.0249798	-4.27706	0.000146443
C9orf142	Protein PAXX	148	1.89499	0.00367567	-4.25601	0.00259551
C9orf142	Protein PAXX	152	1.89499	0.00367567	-4.25601	0.00259551
SDE2	Protein SDE2 homolog	278	1.88911	N/A	-4.24864	0.136658
SRRM1	Serine/arginine repetitive matrix protein 1	616	-1.06863	0.648661	-4.24772	0.00353371
SRRM1	Serine/arginine repetitive matrix protein 1	614	-1.06863	0.648661	-4.24772	0.00353371
ARHGDIA	Rho GDP-dissociation inhibitor 1	24	-1.3941	0.530662	-4.24599	0.00750615
MKI67	Antigen KI-67	1861	-1.51739	0.124973	-4.24399	0.00062971
TOP2A	DNA topoisomerase 2-alpha	1332	-1.78374	0.00252785	-4.24328	1.63132e-05
TOP2A	DNA topoisomerase 2-alpha	1337	-1.78374	0.00252785	-4.24328	1.63132e-05
TOP2A	DNA topoisomerase 2-alpha	1343	-1.78374	0.00252785	-4.24328	1.63132e-05
MARCKS	Myristoylated alanine-rich C-kinase substrate	135	-1.94663	0.0113308	-4.24313	0.12425
HNRNPUL1	Heterogeneous nuclear ribonucleoprotein U-like protein 1	194	N/A	N/A	-4.2431	N/A
TGFB1I1	Transforming growth factor beta-1-induced transcript 1 protein	143	-1.59459	0.694034	-4.23916	N/A
SCAF11	Protein SCAF11	608	-2.75844	0.000179768	-4.22661	3.54474e-05
NPM1	Nucleophosmin	70	-3.5715	0.000236099	-4.22107	1.17095e-05
KDM1A	Lysine-specific histone demethylase 1A	166	-2.10754	0.000483331	-4.21724	5.944e-06
HIST1H1E	Histone H1.4	18	1.69311	0.000714261	-4.21707	2.85389e-06
SDPR	Serum deprivation-response protein	293	-1.56706	0.00569152	-4.21669	4.15896e-05
SDPR	Serum deprivation-response protein	288	-1.56706	0.00569152	-4.21669	4.15896e-05
TXNDC9	Thioredoxin domain-containing protein 9	188	-1.34551	0.321045	-4.21368	0.00138144
SDPR	Serum deprivation-response protein	203	-3.23129	0.0694037	-4.21035	0.000548866
LMO7	LIM domain only protein 7	1048	-1.18871	0.0667766	-4.20367	0.000918092
TOR1AIP1	Torsin-1A-interacting protein 1	154	4.94671	N/A	-4.20216	N/A
EML4	Echinoderm microtubule-associated protein-like 4	899	N/A	N/A	-4.19322	N/A
LSM14A	Protein LSM14 homolog A	192	-1.0788	0.883801	-4.18167	8.9276e-05
PHACTR4	Phosphatase and actin regulator 4	349	-1.23664	0.501983	-4.18135	0.0037178
MAP7D1	MAP7 domain-containing protein 1	544	-2.36202	0.0016255	-4.16186	0.000685312
AHCTF1	Protein ELYS	1216	-13.9861	0.000224018	-4.1578	0.0490265
DDX47	Probable ATP-dependent RNA helicase DDX47	14	N/A	N/A	-4.14715	0.000468435
NAP1L4	Nucleosome assembly protein 1-like 4	5	-1.77334	0.00645324	-4.14232	N/A
NUCKS1	Nuclear ubiquitous casein and cyclin-dependent kinase substrate 1	214	1.00714	0.97271	-4.13415	2.94226e-05
NDRG1	Protein NDRG1	332	-2.36762	0.0618536	-4.12799	0.00051537
ESF1	ESF1 homolog	694	N/A	N/A	-4.12753	1.84179e-05
MYO9B	Unconventional myosin-IXb	1992	-1.11363	0.769424	-4.12353	0.00235923
BAZ1B	Tyrosine-protein kinase BAZ1B	708	-2.0014	0.0811275	-4.11776	0.00183136
WAPAL	Wings apart-like protein homolog	77	-1.2482	0.119994	-4.10442	1.30799e-05
RCSD1	CapZ-interacting protein	127	1.9874	N/A	-4.10377	N/A
TFIP11	Tuftelin-interacting protein 11	98	-1.19712	0.790991	-4.10275	0.00127395
RALY	RNA-binding protein Raly	288	-1.45289	0.718922	-4.10016	0.0113589
NUP153	Nuclear pore complex protein Nup153	338	-1.86511	0.00719576	-4.0885	0.000422981
VIM	Vimentin	56	1.05898	0.644794	-4.08838	1.53937e-05
RBM12B	RNA-binding protein 12B	278	-1.8831	0.263039	-4.086	0.00103389
RBM12B	RNA-binding protein 12B	280	-1.8831	0.263039	-4.086	0.00103389
EIF2A	Eukaryotic translation initiation factor 2A;Eukaryotic translation initiation factor 2A, N-terminally processed	503	2.07334	0.0112753	-4.08362	0.000656197
PARD3	Partitioning defective 3 homolog	692	-2.36802	N/A	-4.08241	N/A
NSFL1C	NSFL1 cofactor p47	272	-1.51027	N/A	-4.07565	N/A
PLEC	Plectin	4385	-1.34802	0.731327	-4.07141	0.532214
SCAF11	Protein SCAF11	613	N/A	N/A	-4.07127	0.000171236
SSFA2	Sperm-specific antigen 2	461	N/A	N/A	-4.06115	N/A
PARG	Poly(ADP-ribose) glycohydrolase	137	N/A	N/A	-4.06039	3.29899e-05
SRRM2	Serine/arginine repetitive matrix protein 2	1403	1.17073	0.145608	-4.05238	N/A
FAM129A	Protein Niban	602	-2.78003	0.0983814	-4.04918	0.0162864
TCOF1	Treacle protein	762	-5.21013	1.3588e-07	-4.04514	1.88916e-05
TCOF1	Treacle protein	764	-5.21013	1.3588e-07	-4.04514	1.88916e-05
TCOF1	Treacle protein	765	-5.21013	1.3588e-07	-4.04514	1.88916e-05
IGF2R	Cation-independent mannose-6-phosphate receptor	2401	-1.77274	0.00198936	-4.04043	6.07083e-07
IGF2R	Cation-independent mannose-6-phosphate receptor	2409	-1.77274	0.00198936	-4.04043	6.07083e-07
SF3B1	Splicing factor 3B subunit 1	142	-1.83504	0.107567	-4.03375	0.000394331
ANKLE2	Ankyrin repeat and LEM domain-containing protein 2	662	-1.14952	0.575567	-4.01856	1.74131e-05
GPATCH8	G patch domain-containing protein 8	738	-2.66736	3.43198e-05	-4.01717	7.75031e-05
GPATCH8	G patch domain-containing protein 8	740	-2.66736	3.43198e-05	-4.01717	7.75031e-05
SETDB1	Histone-lysine N-methyltransferase SETDB1	1130	N/A	N/A	-4.01539	N/A
SETDB1	Histone-lysine N-methyltransferase SETDB1	1137	N/A	N/A	-4.01539	N/A
SETDB1	Histone-lysine N-methyltransferase SETDB1	1138	N/A	N/A	-4.01539	N/A
SETDB1	Histone-lysine N-methyltransferase SETDB1	1140	N/A	N/A	-4.01539	N/A
SETDB1	Histone-lysine N-methyltransferase SETDB1	1135	N/A	N/A	-4.01539	N/A
MAP7D1	MAP7 domain-containing protein 1	113	-1.46898	0.00163918	-4.013	2.16593e-05
MAP7D1	MAP7 domain-containing protein 1	116	-1.46898	0.00163918	-4.013	2.16593e-05
CANX	Calnexin	583	1.40427	0.407888	-4.00344	4.16824e-06
CHAF1B	Chromatin assembly factor 1 subunit B	429	-1.23613	0.0746361	-3.99684	2.3407e-05
LASP1	LIM and SH3 domain protein 1	104	1.29904	0.0590389	-3.9962	0.000281855
TOMM34	Mitochondrial import receptor subunit TOM34	186	1.66226	0.167527	-3.98083	0.0440334
CTTN	Src substrate cortactin	421	-2.75587	0.321403	-3.96981	0.132392
MARS	Methionine--tRNA ligase, cytoplasmic	824	-2.50689	0.194799	-3.96368	0.0432405
CCDC82	Coiled-coil domain-containing protein 82	131	1.12702	0.845179	-3.95904	0.00143419
ESYT2	Extended synaptotagmin-2	753	-1.35007	0.657927	-3.958	0.00113025
NUP98	Nuclear pore complex protein Nup98-Nup96;Nuclear pore complex protein Nup98;Nuclear pore complex protein Nup96	608	N/A	N/A	-3.95396	5.10164e-05
NUP98	Nuclear pore complex protein Nup98-Nup96;Nuclear pore complex protein Nup98;Nuclear pore complex protein Nup96	612	N/A	N/A	-3.95396	5.10164e-05
NFATC2	Nuclear factor of activated T-cells, cytoplasmic 2	757	-1.10318	0.845353	-3.95386	0.00125673
NFATC2	Nuclear factor of activated T-cells, cytoplasmic 2	759	-1.10318	0.845353	-3.95386	0.00125673
RPS6	40S ribosomal protein S6	246	-1.08882	0.666174	-3.94939	1.84109e-06
ZNF318	Zinc finger protein 318	173	-1.168	0.455315	-3.94299	0.000844684
NOLC1	Nucleolar and coiled-body phosphoprotein 1	87	-18.3718	N/A	-3.94173	0.000155069
SRSF6	Serine/arginine-rich splicing factor 6	295	-3.2909	N/A	-3.94015	0.000358616
TBC1D4	TBC1 domain family member 4	341	N/A	N/A	-3.93813	0.0952919
MSL3	Male-specific lethal 3 homolog	405	N/A	N/A	-3.93229	0.000159417
TMPO	Lamina-associated polypeptide 2, isoform alpha;Thymopoietin;Thymopentin	156	-1.49228	0.0579687	-3.92818	0.0553662
ATP2B1	Plasma membrane calcium-transporting ATPase 1	17	1.02121	N/A	-3.92157	N/A
DOCK5	Dedicator of cytokinesis protein 5	1781	-1.26774	0.123805	-3.92086	0.215664
CCDC9	Coiled-coil domain-containing protein 9	390	N/A	N/A	-3.91776	0.0262384
NFATC2IP	NFATC2-interacting protein	88	-3.40294	0.00101807	-3.9119	0.00070294
NFATC2IP	NFATC2-interacting protein	90	-3.40294	0.00101807	-3.9119	0.00070294
NFATC2IP	NFATC2-interacting protein	92	-3.40294	0.00101807	-3.9119	0.00070294
SMARCA4	Transcription activator BRG1	1627	-28.8794	N/A	-3.90437	N/A
SMARCA4	Transcription activator BRG1	1631	-28.8794	N/A	-3.90437	N/A
SMARCA4	Transcription activator BRG1	1640	-28.8794	N/A	-3.90437	N/A
SMARCA4	Transcription activator BRG1	1642	-28.8794	N/A	-3.90437	N/A
SMARCA4	Transcription activator BRG1	1644	-28.8794	N/A	-3.90437	N/A
SRRM2	Serine/arginine repetitive matrix protein 2	435	-2.77124	0.0211186	-3.90131	0.00148702
SRRM2	Serine/arginine repetitive matrix protein 2	436	-2.77124	0.0211186	-3.90131	0.00148702
SRRM2	Serine/arginine repetitive matrix protein 2	437	-2.77124	0.0211186	-3.90131	0.00148702
SRRM2	Serine/arginine repetitive matrix protein 2	440	-2.77124	0.0211186	-3.90131	0.00148702
SPTBN1	Spectrin beta chain, non-erythrocytic 1	2164	-1.29303	N/A	-3.89821	N/A
SRSF2	Serine/arginine-rich splicing factor 2	208	-2.63264	0.0152559	-3.8941	0.0109212
SRSF2	Serine/arginine-rich splicing factor 2	212	-2.63154	0.0302064	-3.89251	0.0227882
DDX10	Probable ATP-dependent RNA helicase DDX10	539	-1.28602	N/A	-3.89032	N/A
SERINC1	Serine incorporator 1	364	-1.03099	0.877579	-3.88792	1.90009e-05
ZFYVE16	Zinc finger FYVE domain-containing protein 16	939	-1.24078	N/A	-3.88063	N/A
TMX1	Thioredoxin-related transmembrane protein 1	247	-1.49667	0.407161	-3.88049	1.90875e-06
MRGBP	MRG/MORF4L-binding protein	194	-1.54259	N/A	-3.88014	N/A
PARVA	Alpha-parvin	19	1.54471	0.0375927	-3.87952	0.000710223
SMARCC2	SWI/SNF complex subunit SMARCC2	283	1.3851	0.132567	-3.87281	0.00526779
TNIP1	TNFAIP3-interacting protein 1	435	-11.3442	2.6761e-05	-3.87045	0.168613
PHAX	Phosphorylated adapter RNA export protein	14	1.00439	0.979527	-3.869	0.0214079
C9orf142	Protein PAXX	148	1.01258	0.936172	-3.85954	7.19152e-05
LARP1	La-related protein 1	90	1.11109	0.739228	-3.85647	1.48404e-05
CANX	Calnexin	564	1.12299	0.866253	-3.8491	8.84732e-05
SPATS2L	SPATS2-like protein	455	-1.00576	N/A	-3.84142	N/A
DPF2	Zinc finger protein ubi-d4	142	-1.09383	0.761939	-3.83942	9.96388e-05
MKI67	Antigen KI-67	357	N/A	N/A	-3.83666	N/A
ITSN2	Intersectin-2	889	1.04122	0.94462	-3.82744	0.0124695
GIT1	ARF GTPase-activating protein GIT1	592	1.32449	0.469929	-3.82349	N/A
IFIT3	Interferon-induced protein with tetratricopeptide repeats 3	203	1.49593	0.00839897	-3.82304	4.5502e-05
DDX24	ATP-dependent RNA helicase DDX24	302	-3.12124	N/A	-3.81912	N/A
PDS5B	Sister chromatid cohesion protein PDS5 homolog B	1358	-1.1731	0.0193316	-3.81703	2.57668e-06
PTRF	Polymerase I and transcript release factor	202	8.04114	0.00806615	-3.80789	0.179677
PTRF	Polymerase I and transcript release factor	203	8.04114	0.00806615	-3.80789	0.179677
DAXX	Death domain-associated protein 6	178	-1.51703	0.137688	-3.80111	0.00225879
FAM129B	Niban-like protein 1	691	1.10467	0.655877	-3.79958	0.000818675
TIMELESS	Protein timeless homolog	1173	-1.1517	0.361685	-3.799	7.96946e-05
RPRD2	Regulation of nuclear pre-mRNA domain-containing protein 2	723	-2.05381	N/A	-3.79737	0.000246125
TCOF1	Treacle protein	906	2.02359	0.00127107	-3.79114	0.0721265
CPEB2	Cytoplasmic polyadenylation element-binding protein 2	92	N/A	N/A	-3.78507	0.0608949
CTTN	Src substrate cortactin	405	2.36787	0.00127361	-3.77846	0.000102577
RPS6KA1	Ribosomal protein S6 kinase alpha-1	363	1.6139	0.0437996	-3.77734	0.157729
TNIP1	TNFAIP3-interacting protein 1	431	N/A	N/A	-3.77503	0.0651258
ATP2B1	Plasma membrane calcium-transporting ATPase 1	1165	-1.30728	0.158761	-3.77258	N/A
LARP7	La-related protein 7	300	-2.86043	0.0771064	-3.77216	9.31843e-06
UTP14A	U3 small nucleolar RNA-associated protein 14 homolog A	445	-1.22504	0.188739	-3.76907	0.000611858
CCDC86	Coiled-coil domain-containing protein 86	69	1.10454	0.903968	-3.76539	0.19428
CAV2	Caveolin-2	20	-1.31592	0.866727	-3.7639	0.451053
CD97	CD97 antigen;CD97 antigen subunit alpha;CD97 antigen subunit beta	831	2.3706	0.000277455	-3.76362	3.32799e-07
GTF3C4	General transcription factor 3C polypeptide 4	611	-1.13327	0.149614	-3.76278	5.51121e-06
ZFC3H1	Zinc finger C3H1 domain-containing protein	655	1.07984	0.799524	-3.75413	0.000136462
ANKRD17	Ankyrin repeat domain-containing protein 17	2041	-2.37107	N/A	-3.7539	N/A
SRRM2	Serine/arginine repetitive matrix protein 2	295	1.10984	0.776665	-3.75299	0.011987
RANBP3	Ran-binding protein 3	333	-1.16116	0.491809	-3.74576	1.93682e-05
CTTN	Src substrate cortactin	401	2.39121	0.00343096	-3.74159	0.000437162
MAP7D1	MAP7 domain-containing protein 1	552	-2.56671	0.000673434	-3.73936	0.000128818
PDS5B	Sister chromatid cohesion protein PDS5 homolog B	1370	-1.14789	0.0458883	-3.735	1.80145e-05
CBX5	Chromobox protein homolog 5	8	-7.06094	N/A	-3.73449	N/A
EEF1D	Elongation factor 1-delta	162	-3.54882	0.00413145	-3.73433	7.56662e-05
EEF1D	Elongation factor 1-delta	147	-3.54882	0.00413145	-3.73433	7.56662e-05
MPHOSPH10	U3 small nucleolar ribonucleoprotein protein MPP10	163	1.12556	0.559094	-3.73154	7.86283e-06
MPHOSPH10	U3 small nucleolar ribonucleoprotein protein MPP10	167	1.12556	0.559094	-3.73154	7.86283e-06
MPHOSPH10	U3 small nucleolar ribonucleoprotein protein MPP10	171	1.12556	0.559094	-3.73154	7.86283e-06
KIAA1468	LisH domain and HEAT repeat-containing protein KIAA1468	51	-2.36823	N/A	-3.72069	N/A
KIAA1468	LisH domain and HEAT repeat-containing protein KIAA1468	54	-2.36823	N/A	-3.72069	N/A
KIAA1468	LisH domain and HEAT repeat-containing protein KIAA1468	56	-2.36823	N/A	-3.72069	N/A
BAZ1B	Tyrosine-protein kinase BAZ1B	705	-2.85308	0.0170273	-3.71984	0.00062559
C2CD2L	C2 domain-containing protein 2-like	464	-1.4906	0.0813007	-3.71713	0.00849027
SRRM2	Serine/arginine repetitive matrix protein 2	2102	-1.34067	0.00493993	-3.7091	0.0014108
ERRFI1	ERBB receptor feedback inhibitor 1	251	1.23032	0.776411	-3.70867	0.00349791
PLEC	Plectin	125	-1.6257	0.0953995	-3.70792	N/A
AHNAK	Neuroblast differentiation-associated protein AHNAK	210	1.19048	0.0267139	-3.70764	0.162358
PHLDB1	Pleckstrin homology-like domain family B member 1	520	1.01359	0.944401	-3.70512	0.00332808
PML	Protein PML	403	1.938	0.225725	-3.70235	N/A
NUFIP1	Nuclear fragile X mental retardation-interacting protein 1	338	-1.40412	0.171406	-3.70186	1.13367e-05
NUFIP1	Nuclear fragile X mental retardation-interacting protein 1	340	-1.40412	0.171406	-3.70186	1.13367e-05
NUFIP1	Nuclear fragile X mental retardation-interacting protein 1	342	-1.40412	0.171406	-3.70186	1.13367e-05
KPNA2	Importin subunit alpha-1	55	-1.33521	N/A	-3.69945	N/A
ARFGEF2	Brefeldin A-inhibited guanine nucleotide-exchange protein 2	227	-1.09774	0.766494	-3.69932	7.80065e-05
PPP1R13L	RelA-associated inhibitor	597	1.0823	0.754034	-3.69776	0.00148515
SDPR	Serum deprivation-response protein	204	-2.83667	0.148791	-3.69617	0.0018881
LUZP1	Leucine zipper protein 1	659	-1.69407	0.0881711	-3.69391	8.42296e-05
ZNF217	Zinc finger protein 217	407	-1.69135	0.0995456	-3.69335	1.15491e-05
CRYBG3	Very large A-kinase anchor protein	457	-1.19613	0.362415	-3.69	0.00175847
NOM1	Nucleolar MIF4G domain-containing protein 1	280	1.47079	0.0387981	-3.68944	0.0298374
NOM1	Nucleolar MIF4G domain-containing protein 1	287	1.47079	0.0387981	-3.68944	0.0298374
RPLP0P6	60S acidic ribosomal protein P0-like;60S acidic ribosomal protein P0	307;307	-1.3951	0.0162317	-3.68182	7.85599e-05
TNS3	Tensin-3	776	1.63992	0.0910148	-3.68121	2.25005e-06
UBAP2L	Ubiquitin-associated protein 2-like	609	1.81678	0.16183	-3.68009	0.0201897
CLASRP	CLK4-associating serine/arginine rich protein	331	-1.62328	0.0981468	-3.6796	3.30961e-05
TRIM41	E3 ubiquitin-protein ligase TRIM41	568	-1.23533	N/A	-3.67102	N/A
YEATS2	YEATS domain-containing protein 2	447	-1.82568	0.0243134	-3.66672	0.00316419
PHF10	PHD finger protein 10	327	-1.71769	0.0219106	-3.66667	8.85565e-06
DENR	Density-regulated protein	73	-1.01761	0.95549	-3.66337	9.35329e-05
ATF7	Cyclic AMP-dependent transcription factor ATF-7	51	N/A	N/A	-3.65588	0.0205806
ATF7	Cyclic AMP-dependent transcription factor ATF-7	53	N/A	N/A	-3.65588	0.0205806
EFHD2	EF-hand domain-containing protein D2	74	-1.15715	0.305031	-3.65454	0.000719917
SP1	Transcription factor Sp1	7	-1.53062	0.0933754	-3.65246	0.0113418
TJP1	Tight junction protein ZO-1	280	-9.73074	0.00737828	-3.64859	0.0125736
TJP1	Tight junction protein ZO-1	284	-9.73074	0.00737828	-3.64859	0.0125736
LRRFIP1	Leucine-rich repeat flightless-interacting protein 1	124	-2.25429	0.066746	-3.64745	0.0425611
STX4	Syntaxin-4	117	1.32004	0.503277	-3.64366	0.00307918
BNIP3	BCL2/adenovirus E1B 19 kDa protein-interacting protein 3	92	-2.54368	0.00478687	-3.64046	7.44187e-06
BNIP3	BCL2/adenovirus E1B 19 kDa protein-interacting protein 3	95	-2.54368	0.00478687	-3.64046	7.44187e-06
CHAF1B	Chromatin assembly factor 1 subunit B	410	-1.3581	0.198505	-3.63925	0.00120316
FOSL2	Fos-related antigen 2	120	-1.84648	0.000360808	-3.63257	0.000152509
SQSTM1	Sequestosome-1	269	-2.47432	0.000151687	-3.63249	3.83986e-05
SQSTM1	Sequestosome-1	272	-5.62791	0.0744764	-3.63249	3.83986e-05
WNK1	Serine/threonine-protein kinase WNK1	2032	3.04519	0.0552121	-3.63108	0.133756
EIF4G2	Eukaryotic translation initiation factor 4 gamma 2	395	2.06865	0.00220047	-3.62892	0.00377943
IRS1	Insulin receptor substrate 1	1078	1.15974	0.129998	-3.62537	4.36489e-07
RPS6KA1	Ribosomal protein S6 kinase alpha-1	369	1.66485	0.0517388	-3.61762	0.0934274
ADAM9	Disintegrin and metalloproteinase domain-containing protein 9	758	-1.67591	0.0685927	-3.61208	0.000329944
ADAM9	Disintegrin and metalloproteinase domain-containing protein 9	761	-1.67591	0.0685927	-3.61208	0.000329944
TCOF1	Treacle protein	982	-1.58285	0.0063576	-3.6089	0.00403676
FGFR1OP	FGFR1 oncogene partner	156	-1.6929	0.281977	-3.6061	0.000290918
FGFR1OP	FGFR1 oncogene partner	160	-1.6929	0.281977	-3.6061	0.000290918
RRP1B	Ribosomal RNA processing protein 1 homolog B	245	1.20347	0.22142	-3.60243	0.000210819
ERCC6L	DNA excision repair protein ERCC-6-like	1069	-1.42162	0.00423875	-3.60096	1.2068e-06
MAP1B	Microtubule-associated protein 1B;MAP1B heavy chain;MAP1 light chain LC1	1792	1.00249	N/A	-3.59923	N/A
ACBD5	Acyl-CoA-binding domain-containing protein 5	193	-1.43118	0.124212	-3.59859	N/A
ACBD5	Acyl-CoA-binding domain-containing protein 5	194	-1.43118	0.124212	-3.59859	N/A
ACBD5	Acyl-CoA-binding domain-containing protein 5	196	-1.43118	0.124212	-3.59859	N/A
ACBD5	Acyl-CoA-binding domain-containing protein 5	200	-1.43118	0.124212	-3.59859	N/A
GIT2	ARF GTPase-activating protein GIT2	397	1.41693	0.0584771	-3.59726	N/A
ZMYND8	Protein kinase C-binding protein 1	547	-1.53952	0.00349568	-3.59632	0.000390095
MMTAG2	Multiple myeloma tumor-associated protein 2	220	1.37607	0.141623	-3.5945	0.0148923
NEDD4L	E3 ubiquitin-protein ligase NEDD4-like	479	-2.23399	0.000313347	-3.58992	0.000726539
MAK16	Protein MAK16 homolog	197	-4.71151	8.69682e-07	-3.58929	0.000970198
MAK16	Protein MAK16 homolog	199	-4.71151	8.69682e-07	-3.58929	0.000970198
MAK16	Protein MAK16 homolog	200	-4.71151	8.69682e-07	-3.58929	0.000970198
MAK16	Protein MAK16 homolog	202	-4.71151	8.69682e-07	-3.58929	0.000970198
KMT2A	Histone-lysine N-methyltransferase 2A;MLL cleavage product N320;MLL cleavage product C180	2391	N/A	N/A	-3.58266	0.0116561
KMT2A	Histone-lysine N-methyltransferase 2A;MLL cleavage product N320;MLL cleavage product C180	2392	N/A	N/A	-3.58266	0.0116561
BUD13	BUD13 homolog	163	-1.20717	0.0836749	-3.57774	4.07567e-06
BUD13	BUD13 homolog	159	-1.20717	0.0836749	-3.57774	4.07567e-06
NMT1	Glycylpeptide N-tetradecanoyltransferase 1	47	-1.47639	0.00566583	-3.57717	6.79333e-06
SF3B1	Splicing factor 3B subunit 1	129	-1.83504	0.107567	-3.57001	0.000958097
TCOF1	Treacle protein	1228	-1.42654	0.0191678	-3.56992	1.07929e-05
CCNL1	Cyclin-L1	352	2.39147	0.148033	-3.56067	N/A
SMARCA5	SWI/SNF-related matrix-associated actin-dependent regulator of chromatin subfamily A member 5	66	-1.83089	0.00168135	-3.55981	5.22528e-08
ZAK	Mitogen-activated protein kinase kinase kinase MLT	593	-1.07852	N/A	-3.55927	N/A
NUP214	Nuclear pore complex protein Nup214	437	-1.13945	0.139938	-3.55885	0.119379
USP42	Ubiquitin carboxyl-terminal hydrolase 42	611	N/A	N/A	-3.55419	N/A
USP42	Ubiquitin carboxyl-terminal hydrolase 42	612	N/A	N/A	-3.55419	N/A
NCAPH2	Condensin-2 complex subunit H2	284	-1.57456	0.037167	-3.55187	7.85304e-05
SMEK1	Serine/threonine-protein phosphatase 4 regulatory subunit 3A	771	-1.07054	0.924989	-3.54799	0.11553
TRIP12	E3 ubiquitin-protein ligase TRIP12	991	1.08478	0.643565	-3.54649	0.000519856
AKT1S1	Proline-rich AKT1 substrate 1	212	-1.59916	N/A	-3.54447	0.0672092
MECP2	Methyl-CpG-binding protein 2	228	-1.09931	0.281412	-3.5412	0.000125489
TFPT	TCF3 fusion partner	180	1.00903	N/A	-3.53275	0.00110684
TPI1	Triosephosphate isomerase	21	-1.79032	0.20481	-3.52922	7.94065e-05
MAP1B	Microtubule-associated protein 1B;MAP1B heavy chain;MAP1 light chain LC1	1653	-2.16424	1.07613e-05	-3.52599	1.67793e-05
PSEN2	Presenilin-2;Presenilin-2 NTF subunit;Presenilin-2 CTF subunit	22	N/A	N/A	-3.52428	N/A
PSEN2	Presenilin-2;Presenilin-2 NTF subunit;Presenilin-2 CTF subunit	25	N/A	N/A	-3.52428	N/A
NAV3	Neuron navigator 3	1186	1.28439	0.407963	-3.52367	0.00132552
TMEM115	Transmembrane protein 115	329	-2.11654	0.00905156	-3.52231	0.000390387
BNIP3	BCL2/adenovirus E1B 19 kDa protein-interacting protein 3	86	-2.45864	0.0308499	-3.51874	0.000272544
SQSTM1	Sequestosome-1	269	N/A	N/A	-3.51272	0.00466023
GOLGB1	Golgin subfamily B member 1	17	-1.05126	0.906369	-3.509	0.0120096
EIF3C	Eukaryotic translation initiation factor 3 subunit C;Eukaryotic translation initiation factor 3 subunit C-like protein	39;39	1.19959	0.528701	-3.5072	5.69547e-05
SCRIB	Protein scribble homolog	1353	-2.37206	N/A	-3.50586	0.0312272
HSP90AB1	Heat shock protein HSP 90-beta;Putative heat shock protein HSP 90-beta 2	261;183	-1.77507	0.365936	-3.5036	0.126455
ZDHHC20	Probable palmitoyltransferase ZDHHC20	305	-1.27024	0.121209	-3.50142	4.18765e-05
RBM33	RNA-binding protein 33	765	N/A	N/A	-3.50101	N/A
PDS5A	Sister chromatid cohesion protein PDS5 homolog A	1305	1.09153	0.429163	-3.49727	0.000136713
GTF3C2	General transcription factor 3C polypeptide 2	167	1.16787	0.487888	-3.4965	0.00409984
SAAL1	Protein SAAL1	6	-1.0185	N/A	-3.48566	0.000124002
ATXN2	Ataxin-2	728	1.70078	0.0116641	-3.48522	0.0709781
SCRIB	Protein scribble homolog	1342	-2.45891	4.83228e-05	-3.4844	3.99529e-05
IWS1	Protein IWS1 homolog	196	-2.25143	0.0284002	-3.48273	0.00874979
IWS1	Protein IWS1 homolog	198	-2.25143	0.0284002	-3.48273	0.00874979
MGEA5	Protein O-GlcNAcase	364	-1.3825	0.00300529	-3.48042	0.00372804
TOP2A	DNA topoisomerase 2-alpha	1469	N/A	N/A	-3.48003	N/A
TOP2A	DNA topoisomerase 2-alpha	1471	N/A	N/A	-3.48003	N/A
TOP2A	DNA topoisomerase 2-alpha	1474	N/A	N/A	-3.48003	N/A
CCDC9	Coiled-coil domain-containing protein 9	386	N/A	N/A	-3.47461	0.0649423
SRSF6	Serine/arginine-rich splicing factor 6;Serine/arginine-rich splicing factor 5;Serine/arginine-rich splicing factor 4	119;117;113	N/A	N/A	-3.47186	0.000301626
RTN4	Reticulon-4	7	-1.46408	0.000896088	-3.47126	2.45178e-06
RPAP3	RNA polymerase II-associated protein 3	116	-1.29508	0.355585	-3.46765	0.0321724
SPAG9	C-Jun-amino-terminal kinase-interacting protein 4	728	-2.52179	N/A	-3.46357	N/A
MAP4	Microtubule-associated protein 4	1151	-1.02994	0.806246	-3.46345	4.09428e-05
ZC3H13	Zinc finger CCCH domain-containing protein 13	993	1.2584	0.13608	-3.46335	0.0373333
KMT2A	Histone-lysine N-methyltransferase 2A;MLL cleavage product N320;MLL cleavage product C180	3511	-1.17823	0.643503	-3.46064	0.0753908
IRF2BP2	Interferon regulatory factor 2-binding protein 2	175	-1.0177	0.955087	-3.46021	1.06237e-05
SZRD1	SUZ domain-containing protein 1	39	-1.8822	0.0151489	-3.45954	0.00230596
RPS6	40S ribosomal protein S6	235	1.55963	0.00774006	-3.45681	0.000217932
RPS6	40S ribosomal protein S6	236	1.55963	0.00774006	-3.45681	0.000217932
RPS6	40S ribosomal protein S6	240	1.55963	0.00774006	-3.45681	0.000217932
MAP7D1	MAP7 domain-containing protein 1	544	-2.56282	3.31375e-05	-3.4546	1.51096e-06
MAP7D1	MAP7 domain-containing protein 1	548	-2.56282	3.31375e-05	-3.4546	1.51096e-06
2023-09-09	Septin-9	30	-1.39922	0.0627126	-3.44898	4.50219e-05
SLC38A1	Sodium-coupled neutral amino acid transporter 1	25	N/A	N/A	-3.44898	9.5263e-05
AHNAK	Neuroblast differentiation-associated protein AHNAK	5552	-1.34411	0.077186	-3.44451	0.00187617
MTDH	Protein LYRIC	426	-1.07134	0.756107	-3.44203	0.00164898
AHCTF1	Protein ELYS	1944	-1.4747	0.0439438	-3.43331	1.36377e-05
SRRM2	Serine/arginine repetitive matrix protein 2	1318	-4.79626	0.000243025	-3.43317	1.75325e-05
NUCKS1	Nuclear ubiquitous casein and cyclin-dependent kinase substrate 1	181	-1.09667	0.391019	-3.43098	3.4732e-06
ELAC2	Zinc phosphodiesterase ELAC protein 2	217	-1.26502	0.130407	-3.42908	0.00121487
ZC3H13	Zinc finger CCCH domain-containing protein 13	242	1.34362	0.168924	-3.4268	8.40504e-05
AHNAK2	Protein AHNAK2	298	-1.80858	0.475067	-3.42528	0.245146
EHBP1	EH domain-binding protein 1	1058	-1.24742	0.358215	-3.42295	0.00129102
SAP30BP	SAP30-binding protein	113	-1.56245	0.373223	-3.41522	0.00950742
LIMA1	LIM domain and actin-binding protein 1	490	1.1494	0.666866	-3.40959	0.000198317
RANBP2	E3 SUMO-protein ligase RanBP2	781	1.05455	0.764252	-3.40459	0.0968261
DKC1	H/ACA ribonucleoprotein complex subunit 4	513	1.23307	0.271917	-3.40154	0.000159489
SRRM1	Serine/arginine repetitive matrix protein 1	626	1.55808	0.0643213	-3.4014	0.001009
SRRM1	Serine/arginine repetitive matrix protein 1	628	1.55808	0.0643213	-3.4014	0.001009
YTHDC1	YTH domain-containing protein 1	322	N/A	N/A	-3.39575	N/A
BRD9	Bromodomain-containing protein 9	588	-1.50505	0.186947	-3.39486	N/A
CLINT1	Clathrin interactor 1	299	1.50435	0.430673	-3.39076	0.0339225
FIP1L1	Pre-mRNA 3'-end-processing factor FIP1	81	-10.5493	2.19563e-06	-3.39048	0.000239858
CCNL1	Cyclin-L1	335	-3.51904	0.322712	-3.38431	0.00909151
IGF2R	Cation-independent mannose-6-phosphate receptor	2484	-1.41984	0.179233	-3.38407	3.12328e-05
NOP56	Nucleolar protein 56	519	-1.17045	0.248276	-3.37807	6.52343e-05
NOP56	Nucleolar protein 56	520	-1.17045	0.248276	-3.37807	6.52343e-05
CYBRD1	Cytochrome b reductase 1	285	3.01292	1.58605e-05	-3.378	0.00392707
CHD4	Chromodomain-helicase-DNA-binding protein 4	110	-1.83858	0.00304156	-3.37087	6.57981e-05
STMN1	Stathmin	25	-1.05473	0.644307	-3.36888	3.38619e-06
HUWE1	E3 ubiquitin-protein ligase HUWE1	2887	-2.1503	N/A	-3.35823	N/A
GTF2F1	General transcription factor IIF subunit 1	305	-3.43857	3.74468e-07	-3.35467	0.000588251
GTF2F1	General transcription factor IIF subunit 1	307	-3.43857	3.74468e-07	-3.35467	0.000588251
GTF2F1	General transcription factor IIF subunit 1	308	-3.43857	3.74468e-07	-3.35467	0.000588251
GTF2F1	General transcription factor IIF subunit 1	311	-3.43857	3.74468e-07	-3.35467	0.000588251
SRRM2	Serine/arginine repetitive matrix protein 2	1233	N/A	N/A	-3.35464	N/A
NEDD4L	E3 ubiquitin-protein ligase NEDD4-like	448	1.26296	0.126616	-3.34102	0.000395355
PHLDB1	Pleckstrin homology-like domain family B member 1	518	-1.36348	0.421038	-3.3385	0.0120604
FAM129A	Protein Niban	582	-1.51845	0.123041	-3.33815	0.0210298
ABCF1	ATP-binding cassette sub-family F member 1	109	1.65804	0.187316	-3.33804	0.000201067
ABCF1	ATP-binding cassette sub-family F member 1	108	1.65804	0.187316	-3.33804	0.000201067
TP53	Cellular tumor antigen p53	315	4.9686	1.7995e-05	-3.33746	0.0330438
PARD3	Partitioning defective 3 homolog	695	N/A	N/A	-3.33674	6.38373e-05
SMIM13	Small integral membrane protein 13	62	-2.15982	0.000329069	-3.33489	6.63183e-06
BMPR2	Bone morphogenetic protein receptor type-2	862	N/A	N/A	-3.33214	N/A
MACF1	Microtubule-actin cross-linking factor 1, isoforms 1/2/3/5	4521	1.10299	0.493336	-3.33177	7.43567e-05
SMIM13	Small integral membrane protein 13	58	-1.56035	0.0600509	-3.3306	0.000105661
SMIM13	Small integral membrane protein 13	60	-1.56035	0.0600509	-3.3306	0.000105661
MAP1B	Microtubule-associated protein 1B;MAP1B heavy chain;MAP1 light chain LC1	2209	-1.43663	0.12819	-3.32937	0.0051328
MAP1B	Microtubule-associated protein 1B;MAP1B heavy chain;MAP1 light chain LC1	2211	-1.43663	0.12819	-3.32937	0.0051328
EGFR	Epidermal growth factor receptor	693	-1.23085	0.256548	-3.32866	0.00163794
ARHGEF12	Rho guanine nucleotide exchange factor 12	637	-4.46497	N/A	-3.32739	N/A
LMNA	Prelamin-A/C;Lamin-A/C	628	-1.17211	N/A	-3.32656	N/A
NCL	Nucleolin	69	1.59306	N/A	-3.32635	N/A
EIF4G1	Eukaryotic translation initiation factor 4 gamma 1	1077	2.54554	0.0275512	-3.32598	0.0105385
CCDC149	Coiled-coil domain-containing protein 149	301	N/A	N/A	-3.32319	0.00929053
CCDC149	Coiled-coil domain-containing protein 149	311	N/A	N/A	-3.32319	0.00929053
CCDC149	Coiled-coil domain-containing protein 149	297	N/A	N/A	-3.32319	0.00929053
CCDC149	Coiled-coil domain-containing protein 149	304	N/A	N/A	-3.32319	0.00929053
RAI14	Ankycorbin	295	-5.8961	4.31294e-05	-3.31841	N/A
BAIAP2	Brain-specific angiogenesis inhibitor 1-associated protein 2	325	-1.91673	0.0304516	-3.31622	0.000162895
WWC1	Protein KIBRA	899	1.70823	0.100476	-3.31362	0.159814
WWC1	Protein KIBRA	895	1.70823	0.100476	-3.31362	0.159814
LIG1	DNA ligase 1	66	1.22053	0.077628	-3.31335	1.1762e-06
LIG1	DNA ligase 1	76	1.22053	0.077628	-3.31335	1.1762e-06
TNIP1	TNFAIP3-interacting protein 1	442	N/A	N/A	-3.30773	0.0898619
ZC3HC1	Nuclear-interacting partner of ALK	335	-1.0469	0.731345	-3.30518	0.00375038
HNRNPH2	Heterogeneous nuclear ribonucleoprotein H2;Heterogeneous nuclear ribonucleoprotein H;Heterogeneous nuclear ribonucleoprotein H, N-terminally processed	104;104	-1.17078	0.752595	-3.30367	8.88667e-05
ARHGAP17	Rho GTPase-activating protein 17	575	-1.0079	0.972809	-3.30113	0.0002265
HSP90AA1	Heat shock protein HSP 90-alpha	263	-2.77535	0.224151	-3.30088	0.000352007
HS1BP3	HCLS1-binding protein 3	249	1.70776	0.1081	-3.30047	0.00503955
BAG6	Large proline-rich protein BAG6	964	1.29624	0.160217	-3.29836	9.47374e-05
FAM129A	Protein Niban	602	1.40987	0.373543	-3.29809	0.00144773
FAM129A	Protein Niban	622	1.16881	0.673081	-3.29809	0.00144773
YBX1	Nuclease-sensitive element-binding protein 1	174	-1.79695	N/A	-3.29612	N/A
MCM2	DNA replication licensing factor MCM2	139	1.49551	0.191358	-3.29601	2.17172e-05
SRRM2	Serine/arginine repetitive matrix protein 2	2032	1.1554	0.33532	-3.29555	0.000115755
SRRM2	Serine/arginine repetitive matrix protein 2	2034	1.1554	0.33532	-3.29555	0.000115755
ATP2B1	Plasma membrane calcium-transporting ATPase 1	1155	-1.52615	0.0780622	-3.29482	0.00236455
ATP2B1	Plasma membrane calcium-transporting ATPase 1	1165	-1.52615	0.0780622	-3.29482	0.00236455
ZMYND8	Protein kinase C-binding protein 1	668	1.17353	0.715393	-3.29363	0.00356401
TP53BP1	Tumor suppressor p53-binding protein 1	1430	1.02425	0.827154	-3.28996	7.73226e-06
RBM25	RNA-binding protein 25	583	-1.21776	0.803406	-3.28928	0.00453438
IWS1	Protein IWS1 homolog	235	-2.6536	0.00693891	-3.28898	0.000614316
IWS1	Protein IWS1 homolog	237	-2.6536	0.00693891	-3.28898	0.000614316
AHNAK	Neuroblast differentiation-associated protein AHNAK	5762	1.83789	0.245642	-3.28868	N/A
YBX3	Y-box-binding protein 3	201	-3.71633	6.56127e-07	-3.287	9.51691e-05
YBX3	Y-box-binding protein 3	203	-3.71633	6.56127e-07	-3.287	9.51691e-05
YBX3	Y-box-binding protein 3	204	-3.71633	6.56127e-07	-3.287	9.51691e-05
IWS1	Protein IWS1 homolog	274	-3.08207	0.168458	-3.27915	8.76303e-06
IWS1	Protein IWS1 homolog	276	-3.08207	0.168458	-3.27915	8.76303e-06
IWS1	Protein IWS1 homolog	287	-3.08207	0.168458	-3.27915	8.76303e-06
IWS1	Protein IWS1 homolog	289	-3.08207	0.168458	-3.27915	8.76303e-06
IWS1	Protein IWS1 homolog	248	-2.06011	0.000273833	-3.26757	6.75714e-05
IWS1	Protein IWS1 homolog	261	-2.06011	0.000273833	-3.26757	6.75714e-05
IWS1	Protein IWS1 homolog	263	-2.06011	0.000273833	-3.26757	6.75714e-05
PPM1G	Protein phosphatase 1G	183	-1.87038	0.00794312	-3.26601	N/A
RAD23B	UV excision repair protein RAD23 homolog B	160	1.09683	0.889324	-3.26094	0.00126688
NOTCH2	Neurogenic locus notch homolog protein 2;Notch 2 extracellular truncation;Notch 2 intracellular domain	1778	1.06269	0.684754	-3.25618	0.00119239
ZHX3	Zinc fingers and homeoboxes protein 3	945	-2.26133	0.000108912	-3.25564	0.000758554
L3MBTL3	Lethal(3)malignant brain tumor-like protein 3	2	N/A	N/A	-3.25435	0.128913
MAP1B	Microtubule-associated protein 1B;MAP1B heavy chain;MAP1 light chain LC1	937	1.13498	0.236404	-3.25383	0.0182251
PHF2	Lysine-specific demethylase PHF2	539	-2.10913	0.0475898	-3.24966	N/A
HUWE1	E3 ubiquitin-protein ligase HUWE1	2362	-1.33987	0.01403	-3.24561	3.21117e-06
HUWE1	E3 ubiquitin-protein ligase HUWE1	2365	-1.33987	0.01403	-3.24561	3.21117e-06
MECP2	Methyl-CpG-binding protein 2	78	-3.27211	N/A	-3.24397	N/A
KHSRP	Far upstream element-binding protein 2	100	-1.76218	0.00796629	-3.24064	0.000115214
AKAP2	A-kinase anchor protein 2	121	N/A	N/A	-3.24019	N/A
FTH1	Ferritin heavy chain;Ferritin heavy chain, N-terminally processed	183	-1.00431	0.978123	-3.23909	5.27585e-05
MAP1B	Microtubule-associated protein 1B;MAP1B heavy chain;MAP1 light chain LC1	1965	1.17853	0.311362	-3.23813	0.000784482
ANAPC1	Anaphase-promoting complex subunit 1	688	-1.11321	0.359124	-3.23122	9.5732e-06
RPS6	40S ribosomal protein S6	241	-3.19893	N/A	-3.22847	N/A
TNFRSF21	Tumor necrosis factor receptor superfamily member 21	541	-1.51848	0.0181015	-3.22717	4.26983e-06
NAF1	H/ACA ribonucleoprotein complex non-core subunit NAF1	315	-1.31722	0.274113	-3.21803	4.41346e-05
TRA2A	Transformer-2 protein homolog alpha	84	-1.27224	0.00927834	-3.21638	5.74422e-07
TRA2A	Transformer-2 protein homolog alpha	86	-1.27224	0.00927834	-3.21638	5.74422e-07
TRIM28	Transcription intermediary factor 1-beta	26	1.49079	0.073893	-3.21318	0.0158982
BAZ1B	Tyrosine-protein kinase BAZ1B	1468	1.03681	0.621658	-3.21019	5.33553e-06
STIM1	Stromal interaction molecule 1	519	N/A	N/A	-3.20999	N/A
CHAMP1	Chromosome alignment-maintaining phosphoprotein 1	436	N/A	N/A	-3.20681	0.00486649
DHX9	ATP-dependent RNA helicase A	87	1.12489	N/A	-3.20177	N/A
OSBPL8	Oxysterol-binding protein-related protein 8	314	-1.12687	0.815989	-3.20162	0.00323293
RIC8A	Synembryn-A	502	-1.34566	0.0454471	-3.19944	0.000591413
SCAF11	Protein SCAF11	400	N/A	N/A	-3.19864	0.000794554
SCAF11	Protein SCAF11	401	N/A	N/A	-3.19864	0.000794554
SCAF11	Protein SCAF11	402	N/A	N/A	-3.19864	0.000794554
SCAF11	Protein SCAF11	405	N/A	N/A	-3.19864	0.000794554
LARP7	La-related protein 7	299	-3.8187	0.122686	-3.19751	0.00174199
FAM129A	Protein Niban	639	-1.37398	N/A	-3.19647	N/A
CHAMP1	Chromosome alignment-maintaining phosphoprotein 1	427	-1.61938	0.000112293	-3.19069	0.000130707
CHAMP1	Chromosome alignment-maintaining phosphoprotein 1	432	-1.61938	0.000112293	-3.19069	0.000130707
CHAMP1	Chromosome alignment-maintaining phosphoprotein 1	436	-1.61938	0.000112293	-3.19069	0.000130707
SMARCAD1	SWI/SNF-related matrix-associated actin-dependent regulator of chromatin subfamily A containing DEAD/H box 1	212	-1.59846	N/A	-3.18917	N/A
TOP2B	DNA topoisomerase 2-beta	1400	-1.797	0.00302682	-3.18634	8.31166e-05
TOP2B	DNA topoisomerase 2-beta	1413	-1.797	0.00302682	-3.18634	8.31166e-05
TOP2B	DNA topoisomerase 2-beta	1424	-1.797	0.00302682	-3.18634	8.31166e-05
USP9Y	Probable ubiquitin carboxyl-terminal hydrolase FAF-Y;Probable ubiquitin carboxyl-terminal hydrolase FAF-X	347;346	1.89132	0.00909804	-3.18504	0.00122144
USP9Y	Probable ubiquitin carboxyl-terminal hydrolase FAF-Y;Probable ubiquitin carboxyl-terminal hydrolase FAF-X	348;347	1.89132	0.00909804	-3.18504	0.00122144
BCLAF1	Bcl-2-associated transcription factor 1	284	-5.73308	0.381558	-3.18446	N/A
PIEZO1	Piezo-type mechanosensitive ion channel component 1	1391	-2.53993	0.00179464	-3.17433	0.0016435
PIEZO1	Piezo-type mechanosensitive ion channel component 1	1395	-2.53993	0.00179464	-3.17433	0.0016435
NPM1	Nucleophosmin	243	-1.52543	0.0240241	-3.17362	0.000190455
MECOM	MDS1 and EVI1 complex locus protein EVI1	624	1.00403	0.988295	-3.17342	0.0017405
UNG	Uracil-DNA glycosylase	64	1.23923	0.259851	-3.17334	6.49087e-05
UNG	Uracil-DNA glycosylase	60	1.23923	0.259851	-3.17334	6.49087e-05
SDCCAG3	Serologically defined colon cancer antigen 3	243	-1.06187	0.59623	-3.16843	2.92918e-05
SDCCAG3	Serologically defined colon cancer antigen 3	247	-1.06187	0.59623	-3.16843	2.92918e-05
ESAM	Endothelial cell-selective adhesion molecule	339	N/A	N/A	-3.16639	0.183106
TCOF1	Treacle protein	1378	-1.07126	0.606051	-3.166	5.00647e-05
ELAC2	Zinc phosphodiesterase ELAC protein 2	208	-1.61465	0.0212929	-3.16183	0.000195437
ELAC2	Zinc phosphodiesterase ELAC protein 2	212	-1.61465	0.0212929	-3.16183	0.000195437
ELAC2	Zinc phosphodiesterase ELAC protein 2	213	-1.61465	0.0212929	-3.16183	0.000195437
ELAC2	Zinc phosphodiesterase ELAC protein 2	215	-1.61465	0.0212929	-3.16183	0.000195437
SRC	Tyrosine-protein kinase Fyn;Tyrosine-protein kinase Lck;Tyrosine-protein kinase Yes;Proto-oncogene tyrosine-protein kinase Src	420;394;426;419	2.37642	N/A	-3.16098	N/A
CARHSP1	Calcium-regulated heat stable protein 1	30	1.48811	0.0975286	-3.15542	0.00214813
CARHSP1	Calcium-regulated heat stable protein 1	32	1.48811	0.0975286	-3.15542	0.00214813
SMG1	Serine/threonine-protein kinase SMG1	3573	-1.30081	0.0960741	-3.15535	4.91821e-05
NOP2	Probable 28S rRNA (cytosine(4447)-C(5))-methyltransferase	67	1.00966	0.970032	-3.15386	N/A
NOLC1	Nucleolar and coiled-body phosphoprotein 1	83	-18.9812	N/A	-3.1522	0.027097
PDLIM5	PDZ and LIM domain protein 5	313	-1.18059	0.340613	-3.15148	0.000173314
SZRD1	SUZ domain-containing protein 1	37	-1.9593	0.250026	-3.14921	N/A
EHBP1L1	EH domain-binding protein 1-like protein 1	285	1.27785	0.613811	-3.1445	0.181558
IWS1	Protein IWS1 homolog	250	-1.98241	0.000971627	-3.14435	0.000297905
SPECC1L	Cytospin-A	887	-1.03918	0.930381	-3.14321	0.00793091
HCFC1	Host cell factor 1;HCF N-terminal chain 1;HCF N-terminal chain 2;HCF N-terminal chain 3;HCF N-terminal chain 4;HCF N-terminal chain 5;HCF N-terminal chain 6;HCF C-terminal chain 1;HCF C-terminal chain 2;HCF C-terminal chain 3;HCF C-terminal chain 4;HCF C-terminal chain 5;HCF C-terminal chain 6	1507	-1.27879	0.0478249	-3.14101	9.14575e-05
MAP1S	Microtubule-associated protein 1S;MAP1S heavy chain;MAP1S light chain	631	1.09189	0.897782	-3.13929	0.0468188
HNRNPK	Heterogeneous nuclear ribonucleoprotein K	379	-1.1702	0.256428	-3.13692	3.31054e-05
RBM12B	RNA-binding protein 12B	250	3.86533	8.87667e-05	-3.13477	0.0536782
RBM12B	RNA-binding protein 12B	254	3.86533	8.87667e-05	-3.13477	0.0536782
DNM1L	Dynamin-1-like protein	616	-1.27872	0.301395	-3.13323	0.00105024
MAP1B	Microtubule-associated protein 1B;MAP1B heavy chain;MAP1 light chain LC1	1793	1.01076	N/A	-3.13199	N/A
LMNA	Prelamin-A/C;Lamin-A/C	616	-1.22541	0.0358255	-3.13175	0.0399801
SON	Protein SON	1691	1.01729	N/A	-3.13002	N/A
PAXBP1	PAX3- and PAX7-binding protein 1	295	-1.00039	0.999285	-3.12802	0.00560093
FBXO28	F-box only protein 28	344	1.10488	N/A	-3.12425	0.0221944
RPLP2	60S acidic ribosomal protein P2;60S acidic ribosomal protein P1	105;104	-1.20383	0.213569	-3.12412	1.83487e-05
BCL3	B-cell lymphoma 3 protein	374	2.3929	0.00424515	-3.12408	0.0214765
FMNL1	Formin-like protein 1	624	2.23899	0.034579	-3.12312	0.00316384
SVIL	Supervillin	245	1.3459	0.0178509	-3.12074	0.000176939
LARP7	La-related protein 7	258	-1.14393	0.364091	-3.12044	0.11153
TMF1	TATA element modulatory factor	72	-1.51759	0.0554104	-3.11962	0.0044905
PACS1	Phosphofurin acidic cluster sorting protein 1	534	1.51636	0.557795	-3.11882	0.27987
PHF3	PHD finger protein 3	1133	1.14628	0.0732154	-3.11538	1.02739e-05
PDAP1	28 kDa heat- and acid-stable phosphoprotein	57	-1.06808	0.806333	-3.11495	0.00329884
PDAP1	28 kDa heat- and acid-stable phosphoprotein	60	-1.06808	0.806333	-3.11495	0.00329884
PDAP1	28 kDa heat- and acid-stable phosphoprotein	63	-1.06808	0.806333	-3.11495	0.00329884
NOL8	Nucleolar protein 8	1082	-3.64207	7.25462e-06	-3.11256	5.00557e-05
NOL8	Nucleolar protein 8	1083	-3.64207	7.25462e-06	-3.11256	5.00557e-05
NOL8	Nucleolar protein 8	1084	-3.64207	7.25462e-06	-3.11256	5.00557e-05
UTP20	Small subunit processome component 20 homolog	1741	-1.44747	0.00416678	-3.11126	1.37237e-05
SSFA2	Sperm-specific antigen 2	466	-1.55046	0.48609	-3.10919	0.00017562
SRRM2	Serine/arginine repetitive matrix protein 2	2100	-1.19856	0.299853	-3.1082	0.000489778
ZMYND8	Protein kinase C-binding protein 1	652	-1.31259	0.0219665	-3.10684	0.0850335
AHNAK	Neuroblast differentiation-associated protein AHNAK	5739	-2.46938	0.00196531	-3.10519	0.000438731
ZNF185	Zinc finger protein 185	153	1.1993	0.641528	-3.09975	0.000479743
NCL	Nucleolin	619	-2.66194	0.000241528	-3.0959	N/A
CMTR1	Cap-specific mRNA (nucleoside-2'-O-)-methyltransferase 1	29	N/A	N/A	-3.09061	N/A
OGFR	Opioid growth factor receptor	349	1.17493	0.103428	-3.089	0.000252639
DDX47	Probable ATP-dependent RNA helicase DDX47	9	-1.23083	0.0660298	-3.08647	3.737e-05
RBM15	Putative RNA-binding protein 15	266	-1.20858	0.626966	-3.08598	0.0492364
RFFL	E3 ubiquitin-protein ligase rififylin	226	-1.44213	0.0844744	-3.08427	0.00194905
RFFL	E3 ubiquitin-protein ligase rififylin	229	-1.44213	0.0844744	-3.08427	0.00194905
RSL1D1	Ribosomal L1 domain-containing protein 1	361	-1.09982	0.390728	-3.08156	0.000135935
BCLAF1	Bcl-2-associated transcription factor 1	284	3.07934	0.0393401	-3.08107	0.209248
CTPS1	CTP synthase 1	575	1.08694	N/A	-3.07947	0.00182663
KRR1	KRR1 small subunit processome component homolog	3	-1.10344	0.447605	-3.07904	6.60532e-05
PRCC	Proline-rich protein PRCC	157	-1.15152	0.650265	-3.07592	0.000389633
PRCC	Proline-rich protein PRCC	159	-1.15152	0.650265	-3.07592	0.000389633
PCNP	PEST proteolytic signal-containing nuclear protein	147	3.59928	0.0103974	-3.07401	N/A
EBF2	Transcription factor COE2	161	-1.49195	0.425972	-3.07377	0.00608263
XPO4	Exportin-4	521	1.12954	0.779716	-3.07226	0.0066391
CLASP1	CLIP-associating protein 1	646	N/A	N/A	-3.07094	0.00670068
CLASP1	CLIP-associating protein 1	649	N/A	N/A	-3.07094	0.00670068
UTP18	U3 small nucleolar RNA-associated protein 18 homolog	121	-1.84027	0.00240603	-3.06792	0.000464303
UTP18	U3 small nucleolar RNA-associated protein 18 homolog	124	-1.84027	0.00240603	-3.06792	0.000464303
NOP56	Nucleolar protein 56	513	-1.53036	N/A	-3.06634	N/A
SMG1	Serine/threonine-protein kinase SMG1	3570	-2.11819	0.0176536	-3.06617	1.29684e-05
EPB41L2	Band 4.1-like protein 2	715	-1.74594	0.0152288	-3.06532	0.000978293
RRP9	U3 small nucleolar RNA-interacting protein 2	50	-3.31011	1.15238e-07	-3.06282	5.17275e-05
RRP9	U3 small nucleolar RNA-interacting protein 2	51	-3.31011	1.15238e-07	-3.06282	5.17275e-05
RRP9	U3 small nucleolar RNA-interacting protein 2	53	-3.31011	1.15238e-07	-3.06282	5.17275e-05
SNIP1	Smad nuclear-interacting protein 1	49	-2.06071	0.10027	-3.06195	N/A
TPD52L2	Tumor protein D54	12	-1.31694	0.0403503	-3.06163	0.000836604
SMARCAD1	SWI/SNF-related matrix-associated actin-dependent regulator of chromatin subfamily A containing DEAD/H box 1	211	-4.38905	0.0455665	-3.05978	8.21462e-05
SNIP1	Smad nuclear-interacting protein 1	54	1.00974	0.956427	-3.05917	0.00153886
FLII	Protein flightless-1 homolog	856	1.46742	0.0341898	-3.05726	4.94804e-05
AHNAK	Neuroblast differentiation-associated protein AHNAK	5737	-4.20936	0.000192626	-3.05722	N/A
PPP1R3D	Protein phosphatase 1 regulatory subunit 3D	77	4.39198	0.000375184	-3.05442	0.350603
ANKRD17	Ankyrin repeat domain-containing protein 17	2047	-1.32833	0.158982	-3.05315	0.001033
NOLC1	Nucleolar and coiled-body phosphoprotein 1	84	-18.3718	N/A	-3.05097	0.00117451
NOLC1	Nucleolar and coiled-body phosphoprotein 1	85	-18.3718	N/A	-3.05097	0.00117451
NOLC1	Nucleolar and coiled-body phosphoprotein 1	90	-18.3718	N/A	-3.05097	0.00117451
NOLC1	Nucleolar and coiled-body phosphoprotein 1	91	-18.3718	N/A	-3.05097	0.00117451
ERBB2IP	Protein LAP2	602	-1.6076	0.258224	-3.04943	0.0136689
ERBB2IP	Protein LAP2	603	-1.6076	0.258224	-3.04943	0.0136689
ARAP1	Arf-GAP with Rho-GAP domain, ANK repeat and PH domain-containing protein 1	229	-1.00457	0.932664	-3.04854	1.54939e-05
BCL9L	B-cell CLL/lymphoma 9-like protein	989	1.49053	0.0354445	-3.04652	0.0141149
SCARF2	Scavenger receptor class F member 2	687	-2.17493	0.00229309	-3.04506	0.00888062
SCARF2	Scavenger receptor class F member 2	698	-2.17493	0.00229309	-3.04506	0.00888062
CLDN12	Claudin-12	228	N/A	N/A	-3.03549	N/A
CLDN12	Claudin-12	231	N/A	N/A	-3.03549	N/A
CLDN12	Claudin-12	241	N/A	N/A	-3.03549	N/A
ASAP2	Arf-GAP with SH3 domain, ANK repeat and PH domain-containing protein 2	701	-1.29304	0.528179	-3.03473	0.000698241
RBM33	RNA-binding protein 33	205	-2.08111	0.00160323	-3.02514	0.0014036
GINS2	DNA replication complex GINS protein PSF2	182	1.14323	0.195804	-3.02004	0.000308777
PPP6R3	Serine/threonine-protein phosphatase 6 regulatory subunit 3	579	1.3252	0.0852258	-3.01981	0.00398071
RPL30	60S ribosomal protein L30	10	-1.2463	0.288962	-3.01829	0.0104303
ZFY	Zinc finger Y-chromosomal protein;Zinc finger X-chromosomal protein	270;274	1.22796	0.669979	-3.01735	N/A
EIF5B	Eukaryotic translation initiation factor 5B	113	1.19852	0.598203	-3.01676	0.00028473
USP16	Ubiquitin carboxyl-terminal hydrolase 16	552	1.5392	0.0125622	-3.01674	0.0001925
AATF	Protein AATF	310	1.09027	0.552979	-3.01584	0.00135515
SMIM13	Small integral membrane protein 13	60	-2.43709	0.00100333	-3.01392	7.54013e-06
TP53I13	Tumor protein p53-inducible protein 13	385	-1.15586	0.633588	-3.01064	N/A
TP53I13	Tumor protein p53-inducible protein 13	391	-1.15586	0.633588	-3.01064	N/A
TP53I13	Tumor protein p53-inducible protein 13	392	-1.15586	0.633588	-3.01064	N/A
HEXIM1	Protein HEXIM1	252	-3.55937	N/A	-3.00901	0.0503826
GAPVD1	GTPase-activating protein and VPS9 domain-containing protein 1	761	1.23179	N/A	-3.00732	N/A
SP100	Nuclear autoantigen Sp-100	407	1.21852	0.200944	-3.00655	1.52407e-05
SP100	Nuclear autoantigen Sp-100	409	1.21852	0.200944	-3.00655	1.52407e-05
SP100	Nuclear autoantigen Sp-100	410	1.21852	0.200944	-3.00655	1.52407e-05
NOP56	Nucleolar protein 56	569	-3.04782	0.00191737	-3.00578	0.00128651
NOP56	Nucleolar protein 56	570	-3.04782	0.00191737	-3.00578	0.00128651
NOP56	Nucleolar protein 56	563	-3.04782	0.00191737	-3.00578	0.00128651
SPRY4	Protein sprouty homolog 4	125	-1.6257	0.0209673	-3.00449	0.000141145
GRK6	G protein-coupled receptor kinase 6;G protein-coupled receptor kinase 5	484;484	1.22203	0.183779	-3.00337	0.000155574
RPS6	40S ribosomal protein S6	236	1.25414	0.0551686	-3.00027	1.71364e-05
RPS6	40S ribosomal protein S6	240	1.25414	0.0551686	-3.00027	1.71364e-05
BAZ1B	Tyrosine-protein kinase BAZ1B	710	1.43761	N/A	-2.99814	0.0196646
CDH11	Cadherin-11	714	-1.44732	0.261983	-2.99669	0.000528175
HIRIP3	HIRA-interacting protein 3	330	1.45464	0.385857	-2.99578	0.00890525
HIRIP3	HIRA-interacting protein 3	332	1.45464	0.385857	-2.99578	0.00890525
HIRIP3	HIRA-interacting protein 3	333	1.45464	0.385857	-2.99578	0.00890525
CHTF18	Chromosome transmission fidelity protein 18 homolog	871	1.20614	0.167004	-2.9926	4.75467e-05
LMNA	Prelamin-A/C;Lamin-A/C	632	-1.42172	0.0380327	-2.9925	0.000336724
HIVEP2	Transcription factor HIVEP2	955	1.06755	0.841655	-2.99204	0.00343169
AHNAK	Neuroblast differentiation-associated protein AHNAK	5731	-2.37917	0.000938224	-2.99175	0.000162441
SRRM1	Serine/arginine repetitive matrix protein 1	560	-1.20999	0.377754	-2.9852	0.00307532
SRRM1	Serine/arginine repetitive matrix protein 1	562	-1.20999	0.377754	-2.9852	0.00307532
SLC38A1	Sodium-coupled neutral amino acid transporter 1	52	3.83262	4.75756e-05	-2.98181	0.219899
RBM34	RNA-binding protein 34	14	-2.70551	N/A	-2.98181	0.00891122
RBM34	RNA-binding protein 34	28	-2.70551	N/A	-2.98181	0.00891122
TLE1	Transducin-like enhancer protein 1	286	1.05604	N/A	-2.98144	3.45485e-05
ESAM	Endothelial cell-selective adhesion molecule	336	N/A	N/A	-2.98022	0.0485478
ESAM	Endothelial cell-selective adhesion molecule	332	N/A	N/A	-2.98022	0.0485478
ASMTL	N-acetylserotonin O-methyltransferase-like protein	239	-1.08338	0.82919	-2.97911	0.00023364
MTCL1	Microtubule cross-linking factor 1	776	1.59557	0.144259	-2.97777	0.000802786
TOP2B	DNA topoisomerase 2-beta	1413	-1.38183	0.351235	-2.97675	0.00175606
FAM195B	Protein FAM195B	21	-1.03434	0.9208	-2.96958	0.000138602
RAI14	Ankycorbin	318	1.98648	N/A	-2.96619	N/A
HSF1	Heat shock factor protein 1	303	-1.40846	0.238551	-2.96461	0.00124418
PUM2	Pumilio homolog 2	136	2.1712	0.196189	-2.95845	0.0133857
SOWAHC	Ankyrin repeat domain-containing protein SOWAHC	213	1.36354	0.0485938	-2.95472	N/A
SAFB	Scaffold attachment factor B1	604	-1.14366	0.45924	-2.95457	0.000610982
SVIL	Supervillin	238	1.42274	0.00726879	-2.95218	0.000658837
SRRM2	Serine/arginine repetitive matrix protein 2	322	-1.58986	0.20026	-2.95116	0.000156114
BCL9L	B-cell CLL/lymphoma 9-like protein	88	-1.35351	0.399023	-2.94805	0.00320444
HEXIM1	Protein HEXIM1	237	-3.48553	N/A	-2.94658	0.0296911
HEXIM1	Protein HEXIM1	236	-3.48553	N/A	-2.94658	0.0296911
SYMPK	Symplekin	1259	-2.09904	0.000475623	-2.94341	0.000747271
SYMPK	Symplekin	1257	-2.09904	0.000475623	-2.94341	0.000747271
IRS2	Insulin receptor substrate 2	306	3.01047	0.0762235	-2.94237	0.0200254
PTPN12	Tyrosine-protein phosphatase non-receptor type 12	509	N/A	N/A	-2.94123	0.0157643
NUP98	Nuclear pore complex protein Nup98-Nup96;Nuclear pore complex protein Nup98;Nuclear pore complex protein Nup96	670	-2.1366	0.00074028	-2.94017	6.4066e-05
MPHOSPH8	M-phase phosphoprotein 8	149	-1.6183	0.0387289	-2.93866	N/A
MECP2	Methyl-CpG-binding protein 2	229	-1.12493	0.0168702	-2.93659	5.42466e-06
JUND	Transcription factor jun-D	251	-1.04164	N/A	-2.93628	N/A
GATAD2B	Transcriptional repressor p66-beta	122	-1.79096	0.0030104	-2.93602	0.000155285
GATAD2B	Transcriptional repressor p66-beta	120	-1.85108	0.00163283	-2.93602	0.000155285
MAP7D1	MAP7 domain-containing protein 1	554	-2.41252	0.0012274	-2.93431	0.000205068
GATAD2A	Transcriptional repressor p66-alpha	100	-1.4433	0.0184091	-2.93351	2.25638e-05
MVP	Major vault protein	873	-1.46155	0.551654	-2.93246	0.00383837
JUN	Transcription factor AP-1	62	1.11989	0.586526	-2.93097	1.21275e-05
TOP2B	DNA topoisomerase 2-beta	1400	-1.36012	0.313637	-2.92998	0.000604389
CDS2	Phosphatidate cytidylyltransferase 2	21	-2.74408	N/A	-2.92501	0.00562701
RALY	RNA-binding protein Raly	298	3.99939	N/A	-2.92355	0.454061
VPS51	Vacuolar protein sorting-associated protein 51 homolog	18	-1.15469	0.118455	-2.92298	2.69642e-06
DYNC1LI1	Cytoplasmic dynein 1 light intermediate chain 1	516	-1.0427	0.794293	-2.92164	9.99282e-05
VIM	Vimentin	430	1.02843	0.929746	-2.92045	0.000174482
GPN1	GPN-loop GTPase 1	338	1.1742	0.562682	-2.91784	0.000472508
OTUD4	OTU domain-containing protein 4	1006	-1.19751	0.194249	-2.9158	0.000378125
ZFP91	E3 ubiquitin-protein ligase ZFP91	83	1.06372	0.925355	-2.91438	0.00111221
MAP4	Microtubule-associated protein 4	280	1.81955	0.0146498	-2.91428	0.000689463
CCDC6	Coiled-coil domain-containing protein 6	367	N/A	N/A	-2.9141	N/A
CCDC6	Coiled-coil domain-containing protein 6	380	N/A	N/A	-2.9141	N/A
CDK12	Cyclin-dependent kinase 12	333	1.02863	0.894084	-2.91244	0.00248073
RAVER1	Ribonucleoprotein PTB-binding 1	463	-1.32478	N/A	-2.91194	N/A
NOP56	Nucleolar protein 56	563	N/A	N/A	-2.91041	0.00124319
PWWP2A	PWWP domain-containing protein 2A	81	-1.01929	0.784233	-2.91022	0.00053761
PXN	Paxillin	85	-1.06211	0.892801	-2.90962	0.00101857
PPHLN1	Periphilin-1	133	1.23046	0.483002	-2.90657	0.000649987
VIM	Vimentin	459	2.07811	0.489287	-2.90645	0.31073
EPS15L1	Epidermal growth factor receptor substrate 15-like 1	244	1.0559	0.883222	-2.90603	0.00240107
FOSL1	Fos-related antigen 1	74	-1.47313	0.018884	-2.90563	0.000116335
TERF2IP	Telomeric repeat-binding factor 2-interacting protein 1	203	1.1183	0.153774	-2.90545	1.97081e-06
RBM6	RNA-binding protein 6	360	1.08903	0.848606	-2.90363	N/A
MDC1	Mediator of DNA damage checkpoint protein 1	376	1.06105	0.814961	-2.89825	0.000835958
MDC1	Mediator of DNA damage checkpoint protein 1	378	1.06105	0.814961	-2.89825	0.000835958
ZC3H11A	Zinc finger CCCH domain-containing protein 11A	758;759;759;759	-24.1005	N/A	-2.89582	0.011232
EBAG9	Receptor-binding cancer antigen expressed on SiSo cells	36	-1.33061	0.415697	-2.89435	0.00358396
ZFP91	E3 ubiquitin-protein ligase ZFP91	101	-3.09074	0.000150605	-2.89217	0.00038418
ZFP91	E3 ubiquitin-protein ligase ZFP91	103	-3.09074	0.000150605	-2.89217	0.00038418
SUZ12	Polycomb protein SUZ12	546	1.36487	0.144691	-2.89066	0.000235453
KMT2A	Histone-lysine N-methyltransferase 2A;MLL cleavage product N320;MLL cleavage product C180	1837	-1.39179	0.0917079	-2.88924	N/A
NUFIP2	Nuclear fragile X mental retardation-interacting protein 2	374	-1.46051	N/A	-2.88908	0.00180682
POLD3	DNA polymerase delta subunit 3	307	1.44466	0.0916474	-2.88824	0.0185299
SRRM1	Serine/arginine repetitive matrix protein 1	874	-1.46353	0.30377	-2.88512	6.99018e-06
ACIN1	Apoptotic chromatin condensation inducer in the nucleus	254	1.30498	0.102731	-2.88362	0.00143528
IFI16	Gamma-interferon-inducible protein 16	780	-1.42438	0.0398209	-2.88312	0.00123663
YAP1	Transcriptional coactivator YAP1	109	1.53564	0.398631	-2.8822	0.00641434
DKC1	H/ACA ribonucleoprotein complex subunit 4	485	1.07499	0.543205	-2.88042	2.04376e-05
ZEB1	Zinc finger E-box-binding homeobox 1	642	1.30025	0.12138	-2.88004	0.0013843
SCRIB	Protein scribble homolog	1348	-1.50909	0.0341321	-2.87964	8.80348e-05
SMIM13	Small integral membrane protein 13	58	-1.65505	0.0956902	-2.87811	0.0132165
RGS3	Regulator of G-protein signaling 3	806	N/A	N/A	-2.87717	0.00217504
SRRM2	Serine/arginine repetitive matrix protein 2	2381	1.0298	N/A	-2.87454	N/A
ARHGAP29	Rho GTPase-activating protein 29	499	-2.18204	0.0635185	-2.87388	7.48542e-05
ARHGEF11	Rho guanine nucleotide exchange factor 11	1458	-1.12164	0.881698	-2.86918	0.191548
RAB7A	Ras-related protein Rab-7a	72	-1.10095	0.609046	-2.86833	0.00443281
FAM53C	Protein FAM53C	232	1.07245	0.61502	-2.86795	0.000819041
ATXN10	Ataxin-10	430	-3.14051	N/A	-2.86287	0.00972089
ZC3H13	Zinc finger CCCH domain-containing protein 13	198	1.01126	0.952599	-2.86269	0.0117611
KAT7	Histone acetyltransferase KAT7	135	-3.47846	0.000484783	-2.86187	9.09573e-05
KAT7	Histone acetyltransferase KAT7	136	-3.47846	0.000484783	-2.86187	9.09573e-05
KAT7	Histone acetyltransferase KAT7	138	-3.47846	0.000484783	-2.86187	9.09573e-05
KAT7	Histone acetyltransferase KAT7	128	-3.47846	0.000484783	-2.86187	9.09573e-05
KAT7	Histone acetyltransferase KAT7	124	-3.96255	0.000892912	-2.86187	9.09573e-05
GATAD2B	Transcriptional repressor p66-beta	129	-1.81408	2.84417e-05	-2.86114	6.32098e-05
PADI6	Protein-arginine deiminase type-6	455	1.24517	N/A	-2.86017	N/A
NUP214	Nuclear pore complex protein Nup214	657	-2.07311	N/A	-2.85593	N/A
BNIP3	BCL2/adenovirus E1B 19 kDa protein-interacting protein 3	93	N/A	N/A	-2.85195	N/A
PPFIA1	Liprin-alpha-1	239	-1.00322	0.994892	-2.85166	0.00577149
PPFIA1	Liprin-alpha-1	242	-1.00322	0.994892	-2.85166	0.00577149
TJP2	Tight junction protein ZO-2	415	-1.32063	0.170024	-2.85045	0.00262708
SMARCC1	SWI/SNF complex subunit SMARCC1	328	1.07485	0.466816	-2.84887	0.00433931
SMARCC1	SWI/SNF complex subunit SMARCC1	330	1.07485	0.466816	-2.84887	0.00433931
EPS8L2	Epidermal growth factor receptor kinase substrate 8-like protein 2	469	-1.16021	0.856734	-2.84871	0.245943
KMT2B	Histone-lysine N-methyltransferase 2B	1092	-1.45257	0.0409581	-2.8412	0.000985969
KMT2B	Histone-lysine N-methyltransferase 2B	1095	-1.45257	0.0409581	-2.8412	0.000985969
MAP4	Microtubule-associated protein 4	1073	1.2896	0.381788	-2.83992	0.00253313
UFD1L	Ubiquitin fusion degradation protein 1 homolog	299	2.50976	0.00195487	-2.8389	0.0044047
SRRM2	Serine/arginine repetitive matrix protein 2	1413	1.06544	0.646243	-2.83669	0.000485752
AHNAK	Neuroblast differentiation-associated protein AHNAK	2397	-1.49279	0.300823	-2.83648	0.000289662
YBX1	Nuclease-sensitive element-binding protein 1	165	1.2828	0.545859	-2.83302	0.000228021
GATAD2B	Transcriptional repressor p66-beta	120	-6.73412	0.000888251	-2.8307	2.32897e-05
ARFGEF2	Brefeldin A-inhibited guanine nucleotide-exchange protein 2	218	-1.09774	0.766494	-2.82596	0.000417087
TOR1AIP1	Torsin-1A-interacting protein 1	143	1.04396	0.917593	-2.82435	0.00666575
SRRM2	Serine/arginine repetitive matrix protein 2	323	-1.58986	0.20026	-2.82181	6.60639e-05
LNP	Protein lunapark	182	-1.22025	N/A	-2.82079	N/A
FUBP1	Far upstream element-binding protein 1	630	1.31953	0.298093	-2.81958	0.00379519
RALGAPA1	Ral GTPase-activating protein subunit alpha-1	861	1.23914	0.292136	-2.81786	0.190943
ANK2	Ankyrin-2	31	1.02309	0.889985	-2.8177	0.0280828
RPRD2	Regulation of nuclear pre-mRNA domain-containing protein 2	1099	-1.96072	0.0170985	-2.81679	0.00302447
ATP2B1	Plasma membrane calcium-transporting ATPase 1	1155	-1.52337	0.00559694	-2.81435	0.000192179
NFIC	Nuclear factor 1 C-type	333	1.06563	0.749152	-2.81409	0.0073743
NFIC	Nuclear factor 1 C-type	339	1.06563	0.749152	-2.81409	0.0073743
IARS	Isoleucine--tRNA ligase, cytoplasmic	1049	1.6902	0.0578813	-2.81279	0.0198451
PDCD5	Programmed cell death protein 5	119	1.17702	0.687306	-2.81234	0.00871313
PPP1R12A	Protein phosphatase 1 regulatory subunit 12A	299	4.15881	0.055202	-2.81074	0.0341019
EIF6	Eukaryotic translation initiation factor 6	243	N/A	N/A	-2.81051	N/A
RAD23A	UV excision repair protein RAD23 homolog A	123	1.17412	0.746812	-2.81002	0.156358
CTTNBP2NL	CTTNBP2 N-terminal-like protein	560	-1.15967	0.272947	-2.80764	N/A
EI24	Etoposide-induced protein 2.4 homolog	326	-2.05869	0.000425815	-2.80724	0.00020319
EI24	Etoposide-induced protein 2.4 homolog	330	-2.05869	0.000425815	-2.80724	0.00020319
TCOF1	Treacle protein	1257	1.07712	0.77433	-2.80607	0.0150629
NDRG1	Protein NDRG1	328	-1.82091	0.385354	-2.80605	0.00803475
TOR1AIP1	Torsin-1A-interacting protein 1	231	-2.01044	0.00495976	-2.8043	0.117579
LRRFIP1	Leucine-rich repeat flightless-interacting protein 1	120	N/A	N/A	-2.79814	N/A
YAP1	Transcriptional coactivator YAP1	143	-1.78215	0.362507	-2.79704	0.0186325
ZMYND8	Protein kinase C-binding protein 1	406	-1.33811	0.164127	-2.79516	0.00102872
NES	Nestin	1487	-12.7107	N/A	-2.79485	N/A
SLTM	SAFB-like transcription modulator	551	1.60011	0.0713491	-2.79043	0.00779283
SLTM	SAFB-like transcription modulator	553	1.60011	0.0713491	-2.79043	0.00779283
PTPN14	Tyrosine-protein phosphatase non-receptor type 14	465	2.65292	0.00708711	-2.79001	N/A
NEDD4L	E3 ubiquitin-protein ligase NEDD4-like	479	-1.28782	0.673298	-2.78927	0.0304097
ZEB1	Zinc finger E-box-binding homeobox 1	646	1.52058	0.0125301	-2.78842	0.00555894
DIDO1	Death-inducer obliterator 1	1456	1.01445	0.982232	-2.78557	0.00110934
EIF5B	Eukaryotic translation initiation factor 5B	214	-1.15729	0.71699	-2.78439	6.2052e-05
PTRF	Polymerase I and transcript release factor	167	1.67034	0.249359	-2.78423	0.000863147
DDX3X	ATP-dependent RNA helicase DDX3X;ATP-dependent RNA helicase DDX3Y	594;592	1.10052	0.632487	-2.78402	0.00838229
CEP170	Centrosomal protein of 170 kDa	838	-3.57928	0.0311462	-2.78169	0.164808
DKC1	H/ACA ribonucleoprotein complex subunit 4	497	1.10473	0.581956	-2.7802	0.000590206
OGFR	Opioid growth factor receptor	378	1.91064	0.0219925	-2.77968	0.000593912
SPEN	Msx2-interacting protein	1268	-1.28462	0.500381	-2.77947	0.000219193
SPEN	Msx2-interacting protein	1278	-1.28462	0.500381	-2.77947	0.000219193
ZC3HC1	Nuclear-interacting partner of ALK	333	-8.87305	N/A	-2.77845	N/A
LRCH4	Leucine-rich repeat and calponin homology domain-containing protein 4	21	N/A	N/A	-2.77458	N/A
GATAD2B	Transcriptional repressor p66-beta	134	-1.67085	0.0636449	-2.7732	0.00348413
RCSD1	CapZ-interacting protein	17	-1.08426	0.766119	-2.77122	N/A
ZKSCAN1	Zinc finger protein with KRAB and SCAN domains 1	13	-1.35129	0.292801	-2.76987	0.000583137
CEP170	Centrosomal protein of 170 kDa	1112	1.3262	0.0110132	-2.76968	N/A
CAP1	Adenylyl cyclase-associated protein 1	308	-1.94166	0.00181207	-2.7656	N/A
EPB41L2	Band 4.1-like protein 2	39	-2.27943	0.0263856	-2.76293	0.000272012
ZC3HC1	Nuclear-interacting partner of ALK	338	-2.07135	0.000802907	-2.76111	1.86902e-05
ZC3HC1	Nuclear-interacting partner of ALK	344	-2.07135	0.000802907	-2.76111	1.86902e-05
SRRM2	Serine/arginine repetitive matrix protein 2	854	-2.11149	2.1695e-06	-2.76075	8.40598e-05
SRRM2	Serine/arginine repetitive matrix protein 2	856	-2.07014	3.15826e-05	-2.76075	8.40598e-05
TOP2A	DNA topoisomerase 2-alpha	1106	-1.08881	0.617989	-2.75855	0.00362944
STMN1	Stathmin;Stathmin-2	46;80	1.49542	0.0783293	-2.75677	0.0536915
NCOR2	Nuclear receptor corepressor 2	1973	-1.52412	0.0788391	-2.75608	2.05723e-05
SRRM1	Serine/arginine repetitive matrix protein 1	220	-1.26809	0.412021	-2.75496	0.000204872
TNKS1BP1	182 kDa tankyrase-1-binding protein	1383	N/A	N/A	-2.75431	N/A
TNKS1BP1	182 kDa tankyrase-1-binding protein	1385	N/A	N/A	-2.75431	N/A
COG1	Conserved oligomeric Golgi complex subunit 1	459	2.59237	0.0540067	-2.75341	0.484539
KMT2A	Histone-lysine N-methyltransferase 2A;MLL cleavage product N320;MLL cleavage product C180	1845	-2.19444	1.92515e-06	-2.75238	0.000326577
KHSRP	Far upstream element-binding protein 2	277	N/A	N/A	-2.75099	N/A
MAP1B	Microtubule-associated protein 1B;MAP1B heavy chain;MAP1 light chain LC1	1252	-3.35923	0.0352255	-2.75078	0.0115977
EIF3B	Eukaryotic translation initiation factor 3 subunit B	85	-2.28006	N/A	-2.74733	N/A
AHNAK	Neuroblast differentiation-associated protein AHNAK	4960	-1.02196	0.92649	-2.74706	N/A
USP15	Ubiquitin carboxyl-terminal hydrolase 15	229	-1.15207	0.310934	-2.74613	6.78719e-05
USP15	Ubiquitin carboxyl-terminal hydrolase 15	226	-1.15207	0.310934	-2.74613	6.78719e-05
QSER1	Glutamine and serine-rich protein 1	1348	-1.36838	0.00765426	-2.74527	1.12246e-06
QSER1	Glutamine and serine-rich protein 1	1341	-1.36838	0.00765426	-2.74527	1.12246e-06
YAP1	Transcriptional coactivator YAP1	138	-2.03121	0.0887635	-2.74392	0.000423809
HDGFRP2	Hepatoma-derived growth factor-related protein 2	395	-4.13644	3.42225e-06	-2.74271	4.12514e-05
HDGFRP2	Hepatoma-derived growth factor-related protein 2	396	-4.13644	3.42225e-06	-2.74271	4.12514e-05
HDGFRP2	Hepatoma-derived growth factor-related protein 2	397	-4.13644	3.42225e-06	-2.74271	4.12514e-05
HDGFRP2	Hepatoma-derived growth factor-related protein 2	399	-4.13644	3.42225e-06	-2.74271	4.12514e-05
CDCP1	CUB domain-containing protein 1	803	N/A	N/A	-2.74071	N/A
SRRM2	Serine/arginine repetitive matrix protein 2	1387	-1.28145	0.145402	-2.73868	0.000237698
GIT1	ARF GTPase-activating protein GIT1	375	-1.21617	0.633426	-2.73693	0.0469128
SEC16A	Protein transport protein Sec16A	593	-1.07113	0.637485	-2.7365	0.13984
TOR1AIP1	Torsin-1A-interacting protein 1	230	-2.97737	0.00944329	-2.73627	0.0170788
PML	Protein PML	403	-1.69686	0.314542	-2.73433	0.00165127
HIVEP1	Zinc finger protein 40	1036	-1.18404	N/A	-2.73089	N/A
C11orf84	Uncharacterized protein C11orf84	248	-1.99505	1.78296e-07	-2.7307	1.15447e-05
ZEB1	Zinc finger E-box-binding homeobox 1	679	-1.02342	0.872072	-2.7296	4.46363e-05
ANTXR1	Anthrax toxin receptor 1	362	-1.18438	N/A	-2.72881	N/A
NEDD4L	E3 ubiquitin-protein ligase NEDD4-like	487	-2.3546	0.0790173	-2.72869	0.0167082
BCL9L	B-cell CLL/lymphoma 9-like protein	991	1.85744	0.00387815	-2.72828	0.0101561
C11orf84	Uncharacterized protein C11orf84	251	-1.98413	1.40038e-05	-2.72648	6.41573e-05
PRRC2C	Protein PRRC2C	633	1.68069	0.003886	-2.72622	0.0399964
PRRC2C	Protein PRRC2C	636	1.68069	0.003886	-2.72622	0.0399964
MAP4	Microtubule-associated protein 4	521	1.94247	0.000296106	-2.72607	0.00165578
CAD	CAD protein;Glutamine-dependent carbamoyl-phosphate synthase;Aspartate carbamoyltransferase;Dihydroorotase	1859	-1.48694	0.0372416	-2.72599	0.00209846
IWS1	Protein IWS1 homolog	313	-1.76112	0.0361088	-2.7258	0.00317047
IWS1	Protein IWS1 homolog	315	-1.76112	0.0361088	-2.7258	0.00317047
NFIC	Nuclear factor 1 C-type	339	-1.45695	0.066299	-2.72489	1.54978e-05
CDS2	Phosphatidate cytidylyltransferase 2	33	-1.04964	0.938708	-2.72459	0.00418227
PRKDC	DNA-dependent protein kinase catalytic subunit	2612	1.10143	0.753058	-2.72457	0.0168199
ZNF609	Zinc finger protein 609	578	-2.14435	N/A	-2.72444	8.11845e-05
ARHGAP39	Rho GTPase-activating protein 39	604	1.60395	0.0199945	-2.72393	N/A
SMARCA2	Probable global transcription activator SNF2L2	588	N/A	N/A	-2.71043	N/A
SMARCA2	Probable global transcription activator SNF2L2	591	N/A	N/A	-2.71043	N/A
CDK12	Cyclin-dependent kinase 12	343	1.18808	0.14415	-2.70889	6.80207e-06
CDK12	Cyclin-dependent kinase 12	345	1.18808	0.14415	-2.70889	6.80207e-06
KMT2A	Histone-lysine N-methyltransferase 2A;MLL cleavage product N320;MLL cleavage product C180	3028	-1.37792	0.0463201	-2.70877	2.27548e-05
KMT2A	Histone-lysine N-methyltransferase 2A;MLL cleavage product N320;MLL cleavage product C180	3511	-1.00239	0.976669	-2.70656	0.133269
PGRMC1	Membrane-associated progesterone receptor component 1	181	-1.10205	0.7484	-2.70553	0.000670775
FKBP15	FK506-binding protein 15	956	1.59576	0.189005	-2.70182	0.0310637
TMPO	Lamina-associated polypeptide 2, isoform alpha;Thymopoietin;Thymopentin	158	-1.44099	0.171973	-2.70017	0.118716
ARHGAP27	Rho GTPase-activating protein 27	466	-1.51006	0.0795982	-2.6989	0.000162257
CDK12	Cyclin-dependent kinase 12	332	-1.18135	0.218027	-2.69594	0.000334389
KIAA0195	Uncharacterized protein KIAA0195	221	1.9298	N/A	-2.69234	N/A
KIAA0195	Uncharacterized protein KIAA0195	225	1.9298	N/A	-2.69234	N/A
TRAF1	TNF receptor-associated factor 1	66	-1.40302	N/A	-2.6912	N/A
DOCK4	Dedicator of cytokinesis protein 4	1620	-1.0109	0.949252	-2.69064	0.000326124
BET1L	BET1-like protein	9	-1.09197	0.6978	-2.68771	0.00706582
SSRP1	FACT complex subunit SSRP1	672	-2.14381	0.00417348	-2.68699	0.000825554
SSRP1	FACT complex subunit SSRP1	667	-2.14381	0.00417348	-2.68699	0.000825554
SSRP1	FACT complex subunit SSRP1	668	-2.14381	0.00417348	-2.68699	0.000825554
SSRP1	FACT complex subunit SSRP1	671	-2.14381	0.00417348	-2.68699	0.000825554
IWS1	Protein IWS1 homolog	69	1.02631	0.898823	-2.6849	0.00618961
IWS1	Protein IWS1 homolog	80	1.02631	0.898823	-2.6849	0.00618961
IWS1	Protein IWS1 homolog	82	1.02631	0.898823	-2.6849	0.00618961
IWS1	Protein IWS1 homolog	67	1.02631	0.898823	-2.6849	0.00618961
GATAD2A	Transcriptional repressor p66-alpha	114	-1.85831	0.00124113	-2.68474	8.36704e-05
PSEN1	Presenilin-1;Presenilin-1 NTF subunit;Presenilin-1 CTF subunit;Presenilin-1 CTF12	366	-1.92066	0.000241814	-2.68366	0.000274562
PSEN1	Presenilin-1;Presenilin-1 NTF subunit;Presenilin-1 CTF subunit;Presenilin-1 CTF12	367	-1.92066	0.000241814	-2.68366	0.000274562
PKN1	Serine/threonine-protein kinase N1	916	1.03787	0.826792	-2.68016	N/A
RSF1	Remodeling and spacing factor 1	748	1.02587	0.910379	-2.67905	0.00183111
PCM1	Pericentriolar material 1 protein	93	2.16136	0.00620551	-2.67795	0.00419146
SMARCA1	Probable global transcription activator SNF2L1	116	-1.18033	0.554949	-2.67706	N/A
PML	Protein PML	518	-2.39549	0.00445645	-2.67697	0.00348044
PML	Protein PML	527	-2.39549	0.00445645	-2.67697	0.00348044
PML	Protein PML	530	-2.39549	0.00445645	-2.67697	0.00348044
CDCP1	CUB domain-containing protein 1	797	-1.81996	0.00920492	-2.67591	0.00164569
KMT2A	Histone-lysine N-methyltransferase 2A;MLL cleavage product N320;MLL cleavage product C180	3036	-1.14477	0.103483	-2.67552	0.00499567
INCENP	Inner centromere protein	219	1.14585	0.855244	-2.67539	N/A
ESYT1	Extended synaptotagmin-1	1034	1.18206	0.14438	-2.673	0.000643778
HDGFRP2	Hepatoma-derived growth factor-related protein 2	664	-1.18718	0.111058	-2.67215	3.10456e-06
YBX1	Nuclease-sensitive element-binding protein 1	176	1.15653	0.74433	-2.67024	0.0153276
TP53BP1	Tumor suppressor p53-binding protein 1	552	-2.89024	0.0451684	-2.66989	0.0285918
TP53BP1	Tumor suppressor p53-binding protein 1	543	-2.89024	0.0451684	-2.66989	0.0285918
SRRM1	Serine/arginine repetitive matrix protein 1	718	3.87412	4.81093e-05	-2.66976	0.000916426
RBM15	Putative RNA-binding protein 15	265	1.40737	0.74004	-2.66793	0.536537
PPAN	Suppressor of SWI4 1 homolog	359	-1.08413	0.451812	-2.66774	3.79305e-05
HERC2	E3 ubiquitin-protein ligase HERC2	1938	-1.63296	0.000652187	-2.66675	N/A
MAP4	Microtubule-associated protein 4	928	1.05488	0.444597	-2.66638	0.00126132
STUB1	E3 ubiquitin-protein ligase CHIP	19	-1.32836	0.0299783	-2.66595	0.000127793
STUB1	E3 ubiquitin-protein ligase CHIP	23	-1.32836	0.0299783	-2.66595	0.000127793
LARP4B	La-related protein 4B	601	1.91637	0.00756336	-2.66285	0.0093556
YTHDF2	YTH domain-containing family protein 2	39	1.02058	0.885191	-2.66274	3.98746e-05
FLNB	Filamin-B	2478	-1.58808	0.00985223	-2.66156	1.66859e-05
ERRFI1	ERBB receptor feedback inhibitor 1	326	N/A	N/A	-2.66128	0.00335362
ERRFI1	ERBB receptor feedback inhibitor 1	330	N/A	N/A	-2.66128	0.00335362
ERRFI1	ERBB receptor feedback inhibitor 1	334	N/A	N/A	-2.66128	0.00335362
ERRFI1	ERBB receptor feedback inhibitor 1	332	N/A	N/A	-2.66128	0.00335362
SLC16A3	Monocarboxylate transporter 4	464	-1.44914	0.120923	-2.66027	0.000759137
PHLDB2	Pleckstrin homology-like domain family B member 2	71	-3.7637	0.0858973	-2.65968	0.000200106
PHLDB2	Pleckstrin homology-like domain family B member 2	73	-3.7637	0.0858973	-2.65968	0.000200106
POGZ	Pogo transposable element with ZNF domain	425	-1.08041	0.798774	-2.65813	0.00196892
BCLAF1	Bcl-2-associated transcription factor 1	512	-1.17745	0.400444	-2.65606	0.000873067
MMTAG2	Multiple myeloma tumor-associated protein 2	216	N/A	N/A	-2.65514	N/A
AKT1S1	Proline-rich AKT1 substrate 1	202	-1.32298	0.0581167	-2.65273	0.00205138
AKT1S1	Proline-rich AKT1 substrate 1	203	-1.32298	0.0581167	-2.65273	0.00205138
SMARCA4	Transcription activator BRG1	609	-1.50423	0.126297	-2.65226	0.00513018
CHAMP1	Chromosome alignment-maintaining phosphoprotein 1	626	-2.13014	0.202391	-2.65196	0.00303352
SMARCA1	Probable global transcription activator SNF2L1	119	-1.16911	0.515179	-2.65161	N/A
SMARCA1	Probable global transcription activator SNF2L1	118	-1.10915	N/A	-2.65161	N/A
DDX51	ATP-dependent RNA helicase DDX51	83	-1.37666	0.0271884	-2.64913	1.07579e-05
NOP56	Nucleolar protein 56	520	1.16774	0.591777	-2.64864	0.000813194
DYNC1LI1	Cytoplasmic dynein 1 light intermediate chain 1	512	-1.02819	0.928596	-2.64634	0.0292445
CDK11A	Cyclin-dependent kinase 11A;Cyclin-dependent kinase 11B	271;283	-1.30895	0.0255295	-2.64565	4.70144e-05
HIST1H1E	Histone H1.4	18	1.42775	0.0072969	-2.64323	2.27505e-06
CDK12	Cyclin-dependent kinase 12	334	-1.12374	0.357755	-2.64138	9.84811e-05
MTX3	Metaxin-3	284	-1.87186	0.0329094	-2.64096	0.0408035
MYC	Myc proto-oncogene protein	73	-1.73498	0.0862769	-2.64068	0.00320481
SMC4	Structural maintenance of chromosomes protein 4	41	1.53528	0.0160207	-2.64044	5.88426e-05
BRD2	Bromodomain-containing protein 2	298	-1.74464	0.000229413	-2.63892	0.00251765
BRD2	Bromodomain-containing protein 2	301	-1.74464	0.000229413	-2.63892	0.00251765
FIP1L1	Pre-mRNA 3'-end-processing factor FIP1	500	-1.1212	0.9033	-2.63872	0.0381703
SPTBN1	Spectrin beta chain, non-erythrocytic 1	2328	-1.15943	0.535698	-2.63814	0.0820141
CTTNBP2NL	CTTNBP2 N-terminal-like protein	568	1.01803	0.895871	-2.63794	0.000143707
CTTNBP2NL	CTTNBP2 N-terminal-like protein	563	1.01803	0.895871	-2.63794	0.000143707
TPD52L2	Tumor protein D54	166	-1.11426	0.907734	-2.63671	0.000331129
BAG6	Large proline-rich protein BAG6	1081	-1.57809	0.0262942	-2.63636	N/A
ZNF185	Zinc finger protein 185	519	-1.62828	0.000261649	-2.6362	2.20598e-05
ZNF185	Zinc finger protein 185	513	-1.54738	0.000361998	-2.6362	2.20598e-05
SHROOM3	Protein Shroom3	439	-2.98568	N/A	-2.63552	0.00702046
SHROOM3	Protein Shroom3	443	-2.98568	N/A	-2.63552	0.00702046
PHRF1	PHD and RING finger domain-containing protein 1	1202	1.61651	0.0540559	-2.63525	0.00155959
RNF113A	RING finger protein 113A	253	1.09981	0.514932	-2.63381	0.000184642
TJP2	Tight junction protein ZO-2	1067	1.18712	0.0911025	-2.63165	5.59066e-05
NAP1L4	Nucleosome assembly protein 1-like 4	7	1.68815	0.0120535	-2.62981	3.18964e-06
TEX2	Testis-expressed sequence 2 protein	751	-2.23041	0.00569162	-2.6297	N/A
TOPORS	E3 ubiquitin-protein ligase Topors	98	1.03993	0.769042	-2.62508	4.91599e-05
DDB2	DNA damage-binding protein 2	26	2.744	0.00454017	-2.6243	N/A
STMN1	Stathmin	16	1.23678	0.0831587	-2.62346	0.00044314
SRRM2	Serine/arginine repetitive matrix protein 2	2409	1.19995	N/A	-2.62269	N/A
PLA2G4A	Cytosolic phospholipase A2;Phospholipase A2;Lysophospholipase	437	-1.29916	0.778908	-2.62208	N/A
ZC3HC1	Nuclear-interacting partner of ALK	335	-2.18869	0.000453905	-2.62166	0.000141515
PAK4	Serine/threonine-protein kinase PAK 4	181	1.66736	0.410367	-2.62082	0.0172948
PFKFB2	6-phosphofructo-2-kinase/fructose-2,6-bisphosphatase 2;6-phosphofructo-2-kinase;Fructose-2,6-bisphosphatase	483	3.8297	0.00047633	-2.62044	0.00472307
PFKFB2	6-phosphofructo-2-kinase/fructose-2,6-bisphosphatase 2;6-phosphofructo-2-kinase;Fructose-2,6-bisphosphatase	493	3.8297	0.00047633	-2.62044	0.00472307
ZFC3H1	Zinc finger C3H1 domain-containing protein	949	-1.28397	N/A	-2.61908	N/A
DCAF6	DDB1- and CUL4-associated factor 6	847	1.07423	0.563296	-2.61756	0.0016744
DCAF6	DDB1- and CUL4-associated factor 6	850	1.07423	0.563296	-2.61756	0.0016744
CCDC86	Coiled-coil domain-containing protein 86	21	-1.69532	0.0590182	-2.61516	0.000922888
MED24	Mediator of RNA polymerase II transcription subunit 24	873	1.24578	N/A	-2.61502	0.000125132
NEK9	Serine/threonine-protein kinase Nek9	868	2.58222	0.0964749	-2.615	0.023896
GATAD2B	Transcriptional repressor p66-beta	122	-2.64264	8.03245e-07	-2.61478	0.000142047
AKT1	RAC-alpha serine/threonine-protein kinase	124	1.44982	0.304883	-2.61426	0.00116489
NUP153	Nuclear pore complex protein Nup153	334	-1.31031	0.459302	-2.61186	0.0334354
FAM21A	WASH complex subunit FAM21A;WASH complex subunit FAM21C	333;333	1.80037	0.163335	-2.61147	0.0266586
ABCC1	Multidrug resistance-associated protein 1	918	N/A	N/A	-2.61107	N/A
PRRC2C	Protein PRRC2C	2105	1.45362	0.0333419	-2.61083	0.000121223
WDR62	WD repeat-containing protein 62	1228	1.82141	0.00206305	-2.61051	0.000184733
CDS2	Phosphatidate cytidylyltransferase 2	33	-2.83612	N/A	-2.60882	0.00401655
BNIP3	BCL2/adenovirus E1B 19 kDa protein-interacting protein 3	93	-1.06395	0.904767	-2.60826	0.0150733
PTRF	Polymerase I and transcript release factor	387	-21.8155	0.00162726	-2.60814	0.0416557
PTRF	Polymerase I and transcript release factor	389	-21.8155	0.00162726	-2.60814	0.0416557
EIF4G3	Eukaryotic translation initiation factor 4 gamma 3	1156	2.02026	N/A	-2.60783	N/A
EIF4G3	Eukaryotic translation initiation factor 4 gamma 3	1157	1.79813	N/A	-2.60783	N/A
DDX24	ATP-dependent RNA helicase DDX24	295	-1.35857	0.482922	-2.60505	0.00171474
SRRM2	Serine/arginine repetitive matrix protein 2	2044	1.33795	0.00948847	-2.60175	0.000651649
SRRM2	Serine/arginine repetitive matrix protein 2	2046	1.33795	0.00948847	-2.60175	0.000651649
SMAP2	Stromal membrane-associated protein 2	225	1.32052	N/A	-2.60144	N/A
SEC16A	Protein transport protein Sec16A	589	-2.77826	0.0051801	-2.60122	0.00293996
DDX42	ATP-dependent RNA helicase DDX42	185	1.27565	0.433811	-2.60084	0.000902293
LYN	Tyrosine-protein kinase Lyn	13	N/A	N/A	-2.59902	0.000317428
PTPN14	Tyrosine-protein phosphatase non-receptor type 14	809	-1.10678	0.35444	-2.59897	N/A
HIST1H1E	Histone H1.4	2	-1.00562	0.966475	-2.59778	2.06268e-06
FOXK2	Forkhead box protein K2	389	-1.75559	N/A	-2.59656	N/A
FOXK2	Forkhead box protein K2	373	-1.65027	N/A	-2.59656	N/A
MAK16	Protein MAK16 homolog	197	1.19619	0.53936	-2.5965	0.0019858
TMPO	Lamina-associated polypeptide 2, isoform alpha;Thymopoietin;Thymopentin	158	-1.3005	0.74607	-2.59521	0.256418
MLLT4	Afadin	216	3.34033	1.55195e-06	-2.59501	0.000886929
ENSA	Alpha-endosulfine	2	1.40076	0.102221	-2.59474	0.0194434
SRRM2	Serine/arginine repetitive matrix protein 2	864	1.26949	0.509528	-2.5947	0.00145192
ESYT2	Extended synaptotagmin-2	758	-6.21347	0.180997	-2.59363	0.119522
AKT1S1	Proline-rich AKT1 substrate 1	92	-1.34264	0.214364	-2.59343	0.00167942
PTPRJ	Receptor-type tyrosine-protein phosphatase eta	1009	1.38827	0.544242	-2.59115	0.00274434
IRS2	Insulin receptor substrate 2	1203	-1.79559	0.00951649	-2.58971	N/A
CCNL1	Cyclin-L1	329	N/A	N/A	-2.58725	N/A
NUCKS1	Nuclear ubiquitous casein and cyclin-dependent kinase substrate 1	214	-2.58394	0.00062485	-2.58702	0.000176555
NUCKS1	Nuclear ubiquitous casein and cyclin-dependent kinase substrate 1	204	-2.58394	0.00062485	-2.58702	0.000176555
NUCKS1	Nuclear ubiquitous casein and cyclin-dependent kinase substrate 1	202	-2.58394	0.00062485	-2.58702	0.000176555
TRIM56	E3 ubiquitin-protein ligase TRIM56	469	-1.00863	0.98288	-2.58675	0.00562279
CD74	HLA class II histocompatibility antigen gamma chain	25	-1.72689	0.000972622	-2.58535	0.000129414
PRKAR1B	cAMP-dependent protein kinase type I-beta regulatory subunit	83	1.10874	0.410708	-2.58485	0.0629067
HDGF	Hepatoma-derived growth factor	132	1.25251	N/A	-2.58476	0.0664014
PADI6	Protein-arginine deiminase type-6	441	1.37815	0.483466	-2.5842	0.0191344
PADI6	Protein-arginine deiminase type-6	442	1.37815	0.483466	-2.5842	0.0191344
PADI6	Protein-arginine deiminase type-6	444	1.37815	0.483466	-2.5842	0.0191344
CDC42EP4	Cdc42 effector protein 4	118	-1.41787	0.326308	-2.58379	7.50819e-05
AHNAK2	Protein AHNAK2	294	1.21528	0.490372	-2.5807	2.24803e-05
TP53BP1	Tumor suppressor p53-binding protein 1	1426	1.49488	0.0697892	-2.58003	0.00424684
TP53BP1	Tumor suppressor p53-binding protein 1	1430	1.49488	0.0697892	-2.58003	0.00424684
CDK12	Cyclin-dependent kinase 12	325	-1.77651	0.000957248	-2.5778	0.00109124
TAP2	Antigen peptide transporter 2	455	-1.72155	N/A	-2.5755	N/A
AHNAK	Neuroblast differentiation-associated protein AHNAK	5796	-1.78993	0.0143499	-2.57539	0.0978423
PRKAR1A	cAMP-dependent protein kinase type I-alpha regulatory subunit;cAMP-dependent protein kinase type I-alpha regulatory subunit, N-terminally processed	83	1.42624	0.0850509	-2.57462	0.000310551
LIMCH1	LIM and calponin homology domains-containing protein 1	231	1.2757	0.618941	-2.57385	0.000872826
EIF3K	Eukaryotic translation initiation factor 3 subunit K	217	-1.1145	0.263118	-2.57152	0.000366168
KLF12	Krueppel-like factor 12	209	N/A	N/A	-2.56965	0.0660996
ESYT2	Extended synaptotagmin-2	755	-20.2	0.0601846	-2.56758	0.18385
PWP2	Periodic tryptophan protein 2 homolog	891	3.33771	0.104991	-2.56378	0.394329
PWP2	Periodic tryptophan protein 2 homolog	898	3.33771	0.104991	-2.56378	0.394329
PWP2	Periodic tryptophan protein 2 homolog	902	3.33771	0.104991	-2.56378	0.394329
PWP2	Periodic tryptophan protein 2 homolog	913	3.33771	0.104991	-2.56378	0.394329
APPL1	DCC-interacting protein 13-alpha	401	1.90464	0.000425596	-2.56335	0.00014878
NUMA1	Nuclear mitotic apparatus protein 1	395	-1.0046	0.989676	-2.56331	1.90942e-06
HSF1	Heat shock factor protein 1	303	-1.87035	0.00424616	-2.56299	0.000174197
HSF1	Heat shock factor protein 1	307	-1.87035	0.00424616	-2.56299	0.000174197
HNRNPAB	Heterogeneous nuclear ribonucleoprotein A/B	242	-1.23576	0.231694	-2.56287	0.000880408
FOXK1	Forkhead box protein K1	420	1.00046	0.997295	-2.56243	0.000130685
MAP7D1	MAP7 domain-containing protein 1	47	1.04162	0.704305	-2.56207	4.07945e-05
MAP7D1	MAP7 domain-containing protein 1	51	1.04162	0.704305	-2.56207	4.07945e-05
ZNF580	Zinc finger protein 580	15	1.98374	N/A	-2.56015	N/A
MYBBP1A	Myb-binding protein 1A	11	-1.5387	1.71766e-05	-2.56003	4.92858e-06
NAA10	N-alpha-acetyltransferase 10	228	1.83155	0.0100073	-2.55966	0.00194691
AKT1S1	Proline-rich AKT1 substrate 1	88	-1.32462	0.292939	-2.55863	0.00494852
SRRM2	Serine/arginine repetitive matrix protein 2	1329	1.13018	0.694707	-2.55799	0.024853
NOL12	Nucleolar protein 12	134	-1.34367	0.0380626	-2.5565	0.00039218
NOL12	Nucleolar protein 12	139	-1.34367	0.0380626	-2.5565	0.00039218
NOL12	Nucleolar protein 12	140	-1.34367	0.0380626	-2.5565	0.00039218
FKBP15	FK506-binding protein 15	1114	1.00528	0.97653	-2.55567	0.000828243
EIF6	Eukaryotic translation initiation factor 6	239	-4.02802	0.00859828	-2.55556	N/A
MAK16	Protein MAK16 homolog	199	1.18739	0.683729	-2.55487	0.00576265
MAK16	Protein MAK16 homolog	200	1.18739	0.683729	-2.55487	0.00576265
BAG6	Large proline-rich protein BAG6	1117	1.08841	0.55364	-2.55368	0.00129487
SRRM2	Serine/arginine repetitive matrix protein 2	1320	-1.8394	0.270865	-2.55338	0.0344393
PNPLA6	Neuropathy target esterase	354	1.37197	0.00339438	-2.55273	0.000750291
RRBP1	Ribosome-binding protein 1	1277	1.28069	0.38485	-2.55154	0.000529733
SLC23A2	Solute carrier family 23 member 2	81	-1.5785	0.0121817	-2.55149	0.000944835
SLC23A2	Solute carrier family 23 member 2	79	-1.61139	0.0204378	-2.55149	0.000944835
MTMR9	Myotubularin-related protein 9	548	-1.05661	0.601702	-2.55045	0.000152972
NCL	Nucleolin	67	1.09846	0.695914	-2.54993	0.000431499
HECW2	E3 ubiquitin-protein ligase HECW2	48	1.33654	0.00163263	-2.54978	0.00133208
DPM1	Dolichol-phosphate mannosyltransferase subunit 1	9	1.42744	0.0245729	-2.54958	0.000222209
CCDC86	Coiled-coil domain-containing protein 86	18	-1.75545	0.00232185	-2.54391	5.05505e-06
MAP4K4	Mitogen-activated protein kinase kinase kinase kinase 4	639	1.73632	0.0396953	-2.54319	0.0247449
RPRD1B	Regulation of nuclear pre-mRNA domain-containing protein 1B	134	-1.2308	0.535815	-2.5393	0.0160078
NCOA3	Nuclear receptor coactivator 3	551	N/A	N/A	-2.53608	0.000256199
LMNA	Prelamin-A/C;Lamin-A/C	390	1.00778	0.935026	-2.53434	0.000915273
CCDC9	Coiled-coil domain-containing protein 9	202	N/A	N/A	-2.53374	0.00416816
CCNL1	Cyclin-L1	335	-1.65703	0.570765	-2.53144	0.434661
ADD3	Gamma-adducin	681	-2.43809	0.00123657	-2.53144	0.00767008
ARHGAP12	Rho GTPase-activating protein 12	215	2.03699	0.0581278	-2.53081	0.0269284
BABAM1	BRISC and BRCA1-A complex member 1	7	-3.15513	N/A	-2.53064	0.00384288
BABAM1	BRISC and BRCA1-A complex member 1	8	-3.15513	N/A	-2.53064	0.00384288
BABAM1	BRISC and BRCA1-A complex member 1	10	-3.15513	N/A	-2.53064	0.00384288
SQSTM1	Sequestosome-1	366	-2.03722	0.0015067	-2.53055	0.000200109
CDK12	Cyclin-dependent kinase 12	383	-1.45457	0.393737	-2.53051	0.000461328
CDK12	Cyclin-dependent kinase 12	385	-1.45457	0.393737	-2.53051	0.000461328
CEP170	Centrosomal protein of 170 kDa	1235	N/A	N/A	-2.52529	N/A
PCM1	Pericentriolar material 1 protein	65	-2.3377	6.58187e-05	-2.52197	9.65197e-05
PCM1	Pericentriolar material 1 protein	68	-2.3377	6.58187e-05	-2.52197	9.65197e-05
PCM1	Pericentriolar material 1 protein	69	-2.3377	6.58187e-05	-2.52197	9.65197e-05
TJP2	Tight junction protein ZO-2	986	-1.07524	0.704863	-2.52088	0.000665407
TJP2	Tight junction protein ZO-2	978	-1.21359	0.260951	-2.52088	0.000665407
FAM53C	Protein FAM53C	234	1.12357	0.382655	-2.51999	8.02637e-05
CMTR1	Cap-specific mRNA (nucleoside-2'-O-)-methyltransferase 1	28	-1.10178	0.603189	-2.51909	0.00446722
AHNAK	Neuroblast differentiation-associated protein AHNAK	5763	-1.77197	0.000138417	-2.51558	0.00076437
PPP1R12A	Protein phosphatase 1 regulatory subunit 12A	508	1.94007	N/A	-2.51549	N/A
PPP1R12A	Protein phosphatase 1 regulatory subunit 12A	507	1.5553	N/A	-2.51549	N/A
LMNA	Prelamin-A/C;Lamin-A/C	392	1.00778	0.935026	-2.51235	0.00289412
QSOX2	Sulfhydryl oxidase 2	578	1.23564	0.0513163	-2.51225	3.94336e-05
CD44	CD44 antigen	686	1.01345	0.930008	-2.51178	0.000510185
FOXK1	Forkhead box protein K1	468	-1.45418	0.0245734	-2.5107	0.000278144
NCL	Nucleolin	28	-2.52955	0.000704709	-2.51028	0.153186
LRCH4	Leucine-rich repeat and calponin homology domain-containing protein 4	25	N/A	N/A	-2.50795	N/A
SRRM2	Serine/arginine repetitive matrix protein 2	1878	-1.02071	0.829622	-2.5079	0.000240122
SRRM2	Serine/arginine repetitive matrix protein 2	1880	-1.02071	0.829622	-2.5079	0.000240122
AHNAK	Neuroblast differentiation-associated protein AHNAK	5782	-1.09893	0.837384	-2.50333	0.00316784
OGFR	Opioid growth factor receptor	539	-1.64931	0.0724898	-2.50269	0.00437985
SLAIN2	SLAIN motif-containing protein 2	391	1.82722	0.0534351	-2.50155	0.0098079
UBL7	Ubiquitin-like protein 7	230	1.78872	0.0699906	-2.49964	0.0211644
USO1	General vesicular transport factor p115	942	-1.10337	0.801608	-2.49872	0.000966903
MAP1B	Microtubule-associated protein 1B;MAP1B heavy chain;MAP1 light chain LC1	1779	1.16559	0.246985	-2.49536	0.000115928
NCL	Nucleolin	34	-2.57632	0.000895109	-2.4944	0.163531
PSPC1	Paraspeckle component 1	477	-1.31181	0.117134	-2.49412	0.00154868
AKAP13	A-kinase anchor protein 13	2728	1.20188	0.369301	-2.49407	0.0192347
SRRM2	Serine/arginine repetitive matrix protein 2	2690	-2.66994	4.81424e-05	-2.49377	2.43736e-05
SRRM2	Serine/arginine repetitive matrix protein 2	2692	-2.66994	4.81424e-05	-2.49377	2.43736e-05
SRRM2	Serine/arginine repetitive matrix protein 2	2694	-2.66994	4.81424e-05	-2.49377	2.43736e-05
U2AF2	Splicing factor U2AF 65 kDa subunit	2	1.04099	0.712234	-2.49234	1.13941e-05
NAP1L1	Nucleosome assembly protein 1-like 1	10	1.48903	0.0141927	-2.49151	0.000550104
NUFIP2	Nuclear fragile X mental retardation-interacting protein 2	112	1.14724	0.304843	-2.49027	0.00779252
AJUBA	LIM domain-containing protein ajuba	230	1.06387	0.567109	-2.48821	N/A
AHNAK	Neuroblast differentiation-associated protein AHNAK	5731	-1.2342	0.0542503	-2.48768	0.000252416
PTK2	Focal adhesion kinase 1	910	1.28195	0.0690743	-2.48571	8.99689e-05
PLEC	Plectin	4646	8.05704	N/A	-2.48459	0.223967
KMT2A	Histone-lysine N-methyltransferase 2A;MLL cleavage product N320;MLL cleavage product C180	153	-1.18505	0.671924	-2.48303	1.13591e-07
FOXK1	Forkhead box protein K1	416	1.59323	0.00692097	-2.48301	0.00122347
KMT2A	Histone-lysine N-methyltransferase 2A;MLL cleavage product N320;MLL cleavage product C180	3036	-1.4294	0.0162504	-2.48105	8.55358e-05
RAB34	Ras-related protein Rab-34	241	1.38191	N/A	-2.48038	N/A
GBF1	Golgi-specific brefeldin A-resistance guanine nucleotide exchange factor 1	1298	1.46561	0.21915	-2.47978	0.00112525
NKTR	NK-tumor recognition protein;Putative peptidyl-prolyl cis-trans isomerase	467	N/A	N/A	-2.47935	0.00288562
NKTR	NK-tumor recognition protein;Putative peptidyl-prolyl cis-trans isomerase	472	N/A	N/A	-2.47935	0.00288562
HMGA1	High mobility group protein HMG-I/HMG-Y	102	-8.52388	0.0737221	-2.47857	5.29921e-05
HMGA1	High mobility group protein HMG-I/HMG-Y	103	-8.52388	0.0737221	-2.47857	5.29921e-05
STX7	Syntaxin-7	129	N/A	N/A	-2.47813	N/A
MDC1	Mediator of DNA damage checkpoint protein 1	329	-1.85726	0.0494096	-2.47708	2.95153e-05
MDC1	Mediator of DNA damage checkpoint protein 1	331	-1.85726	0.0494096	-2.47708	2.95153e-05
DDX41	Probable ATP-dependent RNA helicase DDX41	66	N/A	N/A	-2.47598	0.0569629
DDX41	Probable ATP-dependent RNA helicase DDX41	68	N/A	N/A	-2.47598	0.0569629
MAST2	Microtubule-associated serine/threonine-protein kinase 2	148	1.65623	0.0177385	-2.47584	0.0124303
RBMX	RNA-binding motif protein, X chromosome;RNA-binding motif protein, X chromosome, N-terminally processed	352	-1.08478	0.616907	-2.47574	0.000102175
PML	Protein PML	530	-1.81796	0.25472	-2.47402	0.00424403
SRRM2	Serine/arginine repetitive matrix protein 2	1124	-1.05086	0.66429	-2.47313	0.000149405
CCNL1	Cyclin-L1	341	-3.91144	0.00573767	-2.47144	0.0962983
FOXK2	Forkhead box protein K2	398	-1.20081	0.325254	-2.47032	0.000356806
EIF4G1	Eukaryotic translation initiation factor 4 gamma 1	1231	1.11024	0.499927	-2.46808	0.000170929
GATAD2A	Transcriptional repressor p66-alpha	114	-1.30347	0.137372	-2.46801	0.00326458
AHNAK	Neuroblast differentiation-associated protein AHNAK	5793	N/A	N/A	-2.46764	N/A
AHNAK	Neuroblast differentiation-associated protein AHNAK	5794	N/A	N/A	-2.46764	N/A
RPAP3	RNA polymerase II-associated protein 3	119	-1.29508	0.355585	-2.46757	0.000935861
RPAP3	RNA polymerase II-associated protein 3	121	-1.29508	0.355585	-2.46757	0.000935861
TLE3	Transducin-like enhancer protein 3	203	1.19671	0.420587	-2.46659	0.00305207
AKT1S1	Proline-rich AKT1 substrate 1	212	-1.07483	0.422344	-2.46483	0.000241378
OSTM1	Osteopetrosis-associated transmembrane protein 1	324	1.91965	0.000235719	-2.46309	0.248606
RPLP0P6	60S acidic ribosomal protein P0-like;60S acidic ribosomal protein P0	304;304	-1.22194	0.602733	-2.46265	0.0348774
RPLP0P6	60S acidic ribosomal protein P0-like;60S acidic ribosomal protein P0	307;307	-1.22194	0.602733	-2.46265	0.0348774
KMT2A	Histone-lysine N-methyltransferase 2A;MLL cleavage product N320;MLL cleavage product C180	3515	-2.24326	0.0290687	-2.4626	N/A
SHARPIN	Sharpin	165	-1.59995	N/A	-2.46251	N/A
SRRM1	Serine/arginine repetitive matrix protein 1	696	N/A	N/A	-2.46229	N/A
CCDC43	Coiled-coil domain-containing protein 43	139	1.50039	0.0848847	-2.46041	0.00359318
GSK3A	Glycogen synthase kinase-3 alpha	21	1.16587	0.583198	-2.45557	0.0100929
SPTBN1	Spectrin beta chain, non-erythrocytic 1	2161	3.49674	0.21162	-2.45542	0.434584
FOXK2	Forkhead box protein K2	392	-1.67217	0.00648479	-2.45471	0.00725133
NOM1	Nucleolar MIF4G domain-containing protein 1	317	-2.8956	2.83693e-06	-2.45268	0.00114413
NOM1	Nucleolar MIF4G domain-containing protein 1	320	-2.8956	2.83693e-06	-2.45268	0.00114413
NOM1	Nucleolar MIF4G domain-containing protein 1	321	-2.8956	2.83693e-06	-2.45268	0.00114413
AKAP2	A-kinase anchor protein 2	631	1.82829	N/A	-2.45175	N/A
CKAP5	Cytoskeleton-associated protein 5	832	-1.1217	0.516231	-2.45129	N/A
LMO7	LIM domain only protein 7	873	-1.04637	0.714922	-2.45097	0.000635029
LMO7	LIM domain only protein 7	867	-1.05618	0.71521	-2.45097	0.000635029
YAP1	Transcriptional coactivator YAP1	367	1.34309	0.0288386	-2.45054	9.55906e-05
WRAP53	Telomerase Cajal body protein 1	112	-1.93887	0.00271914	-2.45	0.000160353
WRAP53	Telomerase Cajal body protein 1	114	-1.93887	0.00271914	-2.45	0.000160353
RIF1	Telomere-associated protein RIF1	1579	1.65206	0.00769508	-2.44742	0.000760178
GTF2F1	General transcription factor IIF subunit 1	217	-4.35285	0.000462847	-2.44496	0.00518252
GTF2F1	General transcription factor IIF subunit 1	218	-4.35285	0.000462847	-2.44496	0.00518252
GTF2F1	General transcription factor IIF subunit 1	221	-4.35285	0.000462847	-2.44496	0.00518252
GTF2F1	General transcription factor IIF subunit 1	224	-4.35285	0.000462847	-2.44496	0.00518252
PNISR	Arginine/serine-rich protein PNISR	290	-1.40851	N/A	-2.44484	N/A
CDC42BPB	Serine/threonine-protein kinase MRCK beta	1690	1.72973	0.0225422	-2.44431	0.0405833
CDC42BPB	Serine/threonine-protein kinase MRCK beta	1693	1.72973	0.0225422	-2.44431	0.0405833
IRS2	Insulin receptor substrate 2	1186	-1.57752	0.013973	-2.44403	N/A
MAP1B	Microtubule-associated protein 1B;MAP1B heavy chain;MAP1 light chain LC1	1919	-1.81546	N/A	-2.44213	N/A
SMARCA4	Transcription activator BRG1	610	-1.80936	0.0203834	-2.44105	0.000525296
SRRM2	Serine/arginine repetitive matrix protein 2	1401	1.07065	0.55805	-2.44018	0.00583643
KIDINS220	Kinase D-interacting substrate of 220 kDa	1521	1.06299	0.627688	-2.43614	0.000104502
ZFC3H1	Zinc finger C3H1 domain-containing protein	714	-1.9805	0.00262964	-2.43545	8.24085e-05
ZC3HC1	Nuclear-interacting partner of ALK	344	-1.44238	0.0179896	-2.43535	0.000108179
SRRM1	Serine/arginine repetitive matrix protein 1	389	-1.86371	0.00069633	-2.43392	1.90831e-05
SRRM1	Serine/arginine repetitive matrix protein 1	391	-1.86371	0.00069633	-2.43392	1.90831e-05
SRRM1	Serine/arginine repetitive matrix protein 1	393	-1.86371	0.00069633	-2.43392	1.90831e-05
HUWE1	E3 ubiquitin-protein ligase HUWE1	2888	N/A	N/A	-2.43258	0.125291
NUFIP2	Nuclear fragile X mental retardation-interacting protein 2	629	-1.11992	0.385918	-2.42913	0.000101029
NFATC2	Nuclear factor of activated T-cells, cytoplasmic 2	326	1.47998	0.0163049	-2.42644	0.00108001
CCDC94	Coiled-coil domain-containing protein 94	211	1.79894	0.0189009	-2.42355	0.000579907
CCDC94	Coiled-coil domain-containing protein 94	213	1.79894	0.0189009	-2.42355	0.000579907
NFATC2	Nuclear factor of activated T-cells, cytoplasmic 2	859	1.63217	0.0482701	-2.42293	0.00583203
AHCTF1	Protein ELYS	1218	N/A	N/A	-2.42259	N/A
ZNF185	Zinc finger protein 185	519	-1.02702	0.879282	-2.42141	0.000337643
MDC1	Mediator of DNA damage checkpoint protein 1	447	N/A	N/A	-2.4213	0.000272374
RSRC2	Arginine/serine-rich coiled-coil protein 2	32	-1.21569	0.0614818	-2.42061	1.7572e-06
FLNA	Filamin-A	2327	-1.05871	0.817948	-2.41954	0.000461206
EPS15L1	Epidermal growth factor receptor substrate 15-like 1	255	1.14268	0.597565	-2.41871	0.00131896
FAM134C	Protein FAM134C	313	-15.6626	6.76467e-06	-2.41841	0.0493401
FAM134C	Protein FAM134C	320	-15.6626	6.76467e-06	-2.41841	0.0493401
RPS6	40S ribosomal protein S6	247	1.8609	0.0367573	-2.41829	0.00278693
AHNAK	Neuroblast differentiation-associated protein AHNAK	5735	N/A	N/A	-2.41525	0.0134527
SIPA1L1	Signal-induced proliferation-associated 1-like protein 1	1565	1.08984	0.594659	-2.41491	0.0310431
DYNC1I2	Cytoplasmic dynein 1 intermediate chain 2	95	1.10046	0.585585	-2.41473	0.00645013
SQSTM1	Sequestosome-1	361	-2.48963	7.87905e-07	-2.41381	0.000108294
AHNAK	Neuroblast differentiation-associated protein AHNAK	135	1.21008	0.609154	-2.41371	0.000810713
EIF3B	Eukaryotic translation initiation factor 3 subunit B	119	2.7023	0.053533	-2.41334	0.107113
ZHX3	Zinc fingers and homeoboxes protein 3	946	-1.07347	0.485399	-2.41317	0.000346386
ESAM	Endothelial cell-selective adhesion molecule	359	1.16832	0.771291	-2.41315	0.0538407
NEDD4L	E3 ubiquitin-protein ligase NEDD4-like	483	-1.92543	0.00067434	-2.40989	0.0032608
LSM14A	Protein LSM14 homolog A	216	2.01574	0.00644419	-2.40547	0.0209493
EHBP1	EH domain-binding protein 1	432	-2.71876	0.0181172	-2.40267	0.0217498
TOR1AIP1	Torsin-1A-interacting protein 1	220	-1.39602	0.215007	-2.40241	0.000213085
RELL1	RELT-like protein 1	157	1.39932	0.00555332	-2.40124	6.12648e-05
RELL1	RELT-like protein 1	161	1.39932	0.00555332	-2.40124	6.12648e-05
TCOF1	Treacle protein	381	2.06944	0.00127649	-2.40011	0.0213251
C11orf84	Uncharacterized protein C11orf84	308	-1.14847	0.320964	-2.39891	0.00340799
TMEM51	Transmembrane protein 51	182	-2.5731	0.0044509	-2.39881	0.000731056
SRRM2	Serine/arginine repetitive matrix protein 2	1122	-2.71219	0.000590722	-2.39752	0.00104743
SRRM2	Serine/arginine repetitive matrix protein 2	1124	-2.71219	0.000590722	-2.39752	0.00104743
SRRM1	Serine/arginine repetitive matrix protein 1	605	-1.83789	0.000100301	-2.39529	0.000111105
SRRM1	Serine/arginine repetitive matrix protein 1	607	-1.83789	0.000100301	-2.39529	0.000111105
MLF2	Myeloid leukemia factor 2	238	-1.14695	0.600505	-2.39526	N/A
CEP170B	Centrosomal protein of 170 kDa protein B	1135	1.18711	0.00497846	-2.39459	2.44964e-05
HDAC2	Histone deacetylase 2	394	1.08095	0.931275	-2.39388	0.453455
ATXN2L	Ataxin-2-like protein	559	-1.10795	0.496924	-2.39331	0.000105231
SSFA2	Sperm-specific antigen 2	1174	-7.37258	8.24735e-05	-2.39249	0.161197
SSFA2	Sperm-specific antigen 2	1168	-7.20641	2.06693e-05	-2.39249	0.161197
LIMCH1	LIM and calponin homology domains-containing protein 1	973	3.51173	0.00355576	-2.39132	N/A
ZBTB33	Transcriptional regulator Kaiso	237	-1.77497	N/A	-2.3877	N/A
AHNAK	Neuroblast differentiation-associated protein AHNAK	511	-1.41845	0.00326599	-2.38747	2.07942e-05
CDK12	Cyclin-dependent kinase 12	276	-1.12532	0.666924	-2.38641	0.000484374
UBE3A	Ubiquitin-protein ligase E3A	218	-2.64665	0.00202296	-2.38627	N/A
TCEAL3	Transcription elongation factor A protein-like 3;Transcription elongation factor A protein-like 6;Transcription elongation factor A protein-like 5	118;118;124	5.74955	N/A	-2.38606	0.222499
AGFG1	Arf-GAP domain and FG repeat-containing protein 1	181	-2.59901	0.205103	-2.3851	0.00382103
B4GALT1	Beta-1,4-galactosyltransferase 1;Lactose synthase A protein;N-acetyllactosamine synthase;Beta-N-acetylglucosaminylglycopeptide beta-1,4-galactosyltransferase;Beta-N-acetylglucosaminyl-glycolipid beta-1,4-galactosyltransferase;Processed beta-1,4-galactosyltransferase 1	74	1.06121	0.644986	-2.38401	0.000105555
KLC2	Kinesin light chain 2	610	1.41994	0.00215258	-2.3828	0.000142931
SRRM1	Serine/arginine repetitive matrix protein 1	694	N/A	N/A	-2.3816	0.000108435
SRRM1	Serine/arginine repetitive matrix protein 1	695	N/A	N/A	-2.3816	0.000108435
CASC3	Protein CASC3	148	2.52881	0.000308645	-2.381	0.0872674
WRNIP1	ATPase WRNIP1	92	-1.54625	0.0310083	-2.37962	0.00607567
WRNIP1	ATPase WRNIP1	85	-1.54625	0.0310083	-2.37962	0.00607567
WRNIP1	ATPase WRNIP1	75	-1.54625	0.0310083	-2.37962	0.00607567
CIZ1	Cip1-interacting zinc finger protein	838	2.20531	0.000299375	-2.37764	0.00412876
SDE2	Protein SDE2 homolog	274	-1.20249	0.50663	-2.37738	0.0180774
PARN	Poly(A)-specific ribonuclease PARN	619	1.20501	0.161821	-2.37617	0.00023048
HIRIP3	HIRA-interacting protein 3	196	-2.24126	0.00023368	-2.37607	0.000579615
HIRIP3	HIRA-interacting protein 3	199	-2.24126	0.00023368	-2.37607	0.000579615
FOSL2	Fos-related antigen 2	230	1.04172	0.719046	-2.37553	0.0024799
CBX5	Chromobox protein homolog 5	11	-3.60745	3.72297e-06	-2.37509	6.0619e-05
CBX5	Chromobox protein homolog 5	12	-3.60745	3.72297e-06	-2.37509	6.0619e-05
CBX5	Chromobox protein homolog 5	13	-3.60745	3.72297e-06	-2.37509	6.0619e-05
CBX5	Chromobox protein homolog 5	14	-3.60745	3.72297e-06	-2.37509	6.0619e-05
FOXK1	Forkhead box protein K1	472	-1.45418	0.0245734	-2.37413	0.000192819
THRAP3	Thyroid hormone receptor-associated protein 3	406	-1.07984	0.714928	-2.3724	0.0724641
THRAP3	Thyroid hormone receptor-associated protein 3	408	-1.07984	0.714928	-2.3724	0.0724641
ZNF316	Zinc finger protein 316	10	-1.03445	0.900579	-2.37145	0.0355032
ERRFI1	ERBB receptor feedback inhibitor 1	273	-1.46522	0.135063	-2.37	0.000959046
PSD3	PH and SEC7 domain-containing protein 3	1011	2.0187	0.00266381	-2.36886	0.00642659
PSD3	PH and SEC7 domain-containing protein 3	1020	2.0187	0.00266381	-2.36886	0.00642659
DSG2	Desmoglein-2	680	N/A	N/A	-2.3683	0.0839186
DEK	Protein DEK	32	1.18768	0.227475	-2.36764	0.00270541
SON	Protein SON	1697	-1.64843	0.0590619	-2.36743	0.00356451
DBN1	Drebrin	142	2.1859	0.00780952	-2.36728	0.0190189
MMTAG2	Multiple myeloma tumor-associated protein 2	217	N/A	N/A	-2.36725	N/A
MMTAG2	Multiple myeloma tumor-associated protein 2	220	N/A	N/A	-2.36725	N/A
FAM134C	Protein FAM134C	320	1.22585	0.604156	-2.36656	0.0579398
MARCKSL1	MARCKS-related protein	22	1.19266	0.0218639	-2.36585	0.0295555
ERRFI1	ERBB receptor feedback inhibitor 1	326	-1.04603	0.87842	-2.36513	0.000460692
IL16	Pro-interleukin-16;Interleukin-16	322	-1.18159	0.620434	-2.36449	0.00347723
DDX20	Probable ATP-dependent RNA helicase DDX20	500	1.44433	0.0572461	-2.36305	0.00322531
FAM21A	WASH complex subunit FAM21A;WASH complex subunit FAM21C	1179;1179	1.36294	0.0740767	-2.35881	0.00349545
FAM21A	WASH complex subunit FAM21A;WASH complex subunit FAM21C	1180;1180	1.36294	0.0740767	-2.35881	0.00349545
JUND	Transcription factor jun-D	255	1.25577	0.0363338	-2.35853	0.000139617
JUND	Transcription factor jun-D	259	1.25577	0.0363338	-2.35853	0.000139617
LAYN	Layilin	299	1.73304	0.324434	-2.35819	0.00558659
CWC22	Pre-mRNA-splicing factor CWC22 homolog	28	-1.86579	N/A	-2.357	N/A
CWC22	Pre-mRNA-splicing factor CWC22 homolog	39	-1.86579	N/A	-2.357	N/A
MINK1	Misshapen-like kinase 1	763	-1.06483	0.911165	-2.35649	0.00412452
PNISR	Arginine/serine-rich protein PNISR	304	-1.34614	0.0676883	-2.35629	0.00137665
RNF20	E3 ubiquitin-protein ligase BRE1A	138	-1.16637	0.348452	-2.35618	0.000344659
FLNC	Filamin-C	2233	1.67407	0.0308341	-2.35479	0.000513685
UTP18	U3 small nucleolar RNA-associated protein 18 homolog	206	-1.15176	0.470703	-2.35376	0.00221592
NHS	Nance-Horan syndrome protein	1329	1.46857	0.0269376	-2.35334	0.00039441
PCNP	PEST proteolytic signal-containing nuclear protein	119	1.22152	0.0698203	-2.35314	0.000595135
YBX1	Nuclease-sensitive element-binding protein 1	174	-1.10343	N/A	-2.35297	N/A
DNTTIP2	Deoxynucleotidyltransferase terminal-interacting protein 2	87	-1.09649	0.868837	-2.35275	0.0522233
WRN	Werner syndrome ATP-dependent helicase	258	1.05329	0.832277	-2.35261	0.00511266
DCP2	m7GpppN-mRNA hydrolase	246	1.18089	N/A	-2.35147	N/A
DCP2	m7GpppN-mRNA hydrolase	247	1.18089	N/A	-2.35147	N/A
DCP2	m7GpppN-mRNA hydrolase	249	1.18089	N/A	-2.35147	N/A
GATAD2A	Transcriptional repressor p66-alpha	100	-1.52117	0.0111122	-2.35068	4.64228e-05
GATAD2A	Transcriptional repressor p66-alpha	107	-1.52117	0.0111122	-2.35068	4.64228e-05
HUWE1	E3 ubiquitin-protein ligase HUWE1	648	N/A	N/A	-2.34824	N/A
HUWE1	E3 ubiquitin-protein ligase HUWE1	649	N/A	N/A	-2.34824	N/A
HUWE1	E3 ubiquitin-protein ligase HUWE1	655	N/A	N/A	-2.34824	N/A
SLC38A1	Sodium-coupled neutral amino acid transporter 1	28	N/A	N/A	-2.34811	0.0484498
PNN	Pinin	100	1.02437	0.96245	-2.34297	0.00158137
ATXN2L	Ataxin-2-like protein	111	-1.0068	0.9582	-2.34211	4.18833e-05
DNAJC1	DnaJ homolog subfamily C member 1	430	-1.06548	0.814036	-2.34192	0.000610879
CRBN	Protein cereblon	25	1.28764	0.221625	-2.34145	0.025952
ING5	Inhibitor of growth protein 5	118	-1.62008	0.00183929	-2.34098	0.000189244
CDK12	Cyclin-dependent kinase 12	274	-1.10304	0.683115	-2.33916	0.000143903
PPP2R5D	Serine/threonine-protein phosphatase 2A 56 kDa regulatory subunit delta isoform	88	1.33184	0.0234867	-2.33898	0.00210345
PPP2R5D	Serine/threonine-protein phosphatase 2A 56 kDa regulatory subunit delta isoform	89	1.33184	0.0234867	-2.33898	0.00210345
EIF3A	Eukaryotic translation initiation factor 3 subunit A	882	-1.02645	N/A	-2.33705	N/A
FAM21A	WASH complex subunit FAM21A;WASH complex subunit FAM21C	1179;1179	1.13226	N/A	-2.33702	0.0510862
PHF14	PHD finger protein 14	163	-3.42763	N/A	-2.33681	N/A
ZC3H18	Zinc finger CCCH domain-containing protein 18	67	3.77862	0.0127267	-2.33548	0.439369
LARP1	La-related protein 1	785	-1.01621	0.915414	-2.3354	0.00222331
LARP1	La-related protein 1	788	-1.01621	0.915414	-2.3354	0.00222331
ANLN	Actin-binding protein anillin	485	3.30248	0.00025886	-2.33485	0.00461608
LCP1	Plastin-2	5	1.41202	N/A	-2.33456	N/A
ATXN2L	Ataxin-2-like protein	594	1.18897	0.161285	-2.33372	0.000830159
BRPF3	Bromodomain and PHD finger-containing protein 3	959	N/A	N/A	-2.33249	0.00323822
BRPF3	Bromodomain and PHD finger-containing protein 3	962	N/A	N/A	-2.33249	0.00323822
BRPF3	Bromodomain and PHD finger-containing protein 3	965	N/A	N/A	-2.33249	0.00323822
GIGYF2	PERQ amino acid-rich with GYF domain-containing protein 2	382	2.01028	N/A	-2.33121	0.0716735
PKP2	Plakophilin-2	329	-1.19668	N/A	-2.33002	0.0561294
DYRK1B	Dual specificity tyrosine-phosphorylation-regulated kinase 1B;Dual specificity tyrosine-phosphorylation-regulated kinase 1A	273;321	1.6603	0.00474931	-2.32924	0.00235229
FOXJ3	Forkhead box protein J3	223	-1.05413	0.69512	-2.32872	0.000465626
SF3B2	Splicing factor 3B subunit 2	307	-1.07027	0.534672	-2.32711	0.242706
SURF2	Surfeit locus protein 2	195	1.11822	0.292819	-2.32527	3.56946e-06
TNKS1BP1	182 kDa tankyrase-1-binding protein	435	-1.04749	0.744518	-2.32497	0.000708315
RPS6	40S ribosomal protein S6	244	1.93615	0.0157452	-2.32432	0.00143793
HIST1H1E	Histone H1.4;Histone H1.3;Histone H1.2	36;37;36	-1.33503	N/A	-2.32384	N/A
NUMB	Protein numb homolog	238	N/A	N/A	-2.32289	0.010568
NUMB	Protein numb homolog	241	N/A	N/A	-2.32289	0.010568
MAPK1	Mitogen-activated protein kinase 1	185	1.36924	0.393692	-2.32242	0.00412257
MAPK1	Mitogen-activated protein kinase 1	187	1.36924	0.393692	-2.32242	0.00412257
EPN1	Epsin-1	454	-1.05077	0.847267	-2.31736	0.00491378
SLC46A1	Proton-coupled folate transporter	458	-2.37571	0.000992271	-2.31728	0.0137696
MORC2	MORC family CW-type zinc finger protein 2	777	1.06694	0.88216	-2.3171	0.000102608
ZC3H13	Zinc finger CCCH domain-containing protein 13	265	-2.28469	1.01434e-05	-2.31689	0.000230467
ZC3H13	Zinc finger CCCH domain-containing protein 13	263	-2.28469	1.01434e-05	-2.31689	0.000230467
NCAPD2	Condensin complex subunit 1	1333	1.71859	0.0048419	-2.31654	0.00207793
DKC1	H/ACA ribonucleoprotein complex subunit 4	451	1.04554	0.822592	-2.31492	0.000432545
DKC1	H/ACA ribonucleoprotein complex subunit 4	453	1.04554	0.822592	-2.31492	0.000432545
DKC1	H/ACA ribonucleoprotein complex subunit 4	455	1.04554	0.822592	-2.31492	0.000432545
GRAMD1A	GRAM domain-containing protein 1A	263	-1.79454	0.0826939	-2.31427	0.00036884
MCM3	DNA replication licensing factor MCM3	711	-1.20646	0.0845463	-2.31423	0.00119597
MCM3	DNA replication licensing factor MCM3	722	-1.20646	0.0845463	-2.31423	0.00119597
RANBP3	Ran-binding protein 3	353	-1.81162	0.023216	-2.31416	N/A
RANBP3	Ran-binding protein 3	355	-1.81162	0.023216	-2.31416	N/A
RANBP3	Ran-binding protein 3	357	-1.81162	0.023216	-2.31416	N/A
RANBP3	Ran-binding protein 3	358	-1.81162	0.023216	-2.31416	N/A
RANBP3	Ran-binding protein 3	359	-1.81162	0.023216	-2.31416	N/A
SRRM2	Serine/arginine repetitive matrix protein 2	322	-3.61576	N/A	-2.31257	N/A
RBM6	RNA-binding protein 6	360	-2.24354	0.00370624	-2.3102	0.000324726
RBM6	RNA-binding protein 6	362	-2.24354	0.00370624	-2.3102	0.000324726
SP3	Transcription factor Sp3	73	-1.47369	0.00557164	-2.30884	0.00177714
SMARCA4	Transcription activator BRG1	613	-1.71032	0.0461955	-2.30743	0.00114315
TP53BP1	Tumor suppressor p53-binding protein 1	1028	-1.02233	0.93578	-2.30601	0.0217185
SRRM2	Serine/arginine repetitive matrix protein 2	1112	1.16652	0.245386	-2.30326	0.000785119
ICE1	Little elongation complex subunit 1	925	-1.21878	0.248982	-2.30296	0.0739297
MARCKS	Myristoylated alanine-rich C-kinase substrate	118	-2.62224	0.0113935	-2.30242	0.000696838
PABPN1	Polyadenylate-binding protein 2	95	-1.89077	0.000917825	-2.29996	2.44816e-05
ACIN1	Apoptotic chromatin condensation inducer in the nucleus	490	1.16741	0.583029	-2.29972	0.000635232
IFI16	Gamma-interferon-inducible protein 16	153	-1.55491	0.189008	-2.29945	0.00855034
NRXN1	Neurexin-1	664	1.23361	N/A	-2.29932	N/A
NRXN1	Neurexin-1	671	1.23361	N/A	-2.29932	N/A
NRXN1	Neurexin-1	665	1.23361	N/A	-2.29932	N/A
MORC2	MORC family CW-type zinc finger protein 2	779	1.07577	0.86724	-2.29808	0.000105036
ARHGEF11	Rho guanine nucleotide exchange factor 11	1462	1.28129	0.313415	-2.29792	0.110372
TPR	Nucleoprotein TPR	2037	-1.5369	0.148261	-2.29762	0.00343298
NSRP1	Nuclear speckle splicing regulatory protein 1	248	-1.76583	0.00010787	-2.29708	2.55204e-05
NSRP1	Nuclear speckle splicing regulatory protein 1	254	-1.76583	0.00010787	-2.29708	2.55204e-05
NSRP1	Nuclear speckle splicing regulatory protein 1	255	-1.76583	0.00010787	-2.29708	2.55204e-05
CUL4B	Cullin-4B	146	1.12586	0.579353	-2.2944	0.0177014
CHAMP1	Chromosome alignment-maintaining phosphoprotein 1	427	N/A	N/A	-2.29356	0.00965466
MEPCE	7SK snRNA methylphosphate capping enzyme	217	-1.08683	0.450135	-2.29293	0.000453117
MEPCE	7SK snRNA methylphosphate capping enzyme	213	-1.08683	0.450135	-2.29293	0.000453117
OSBPL3	Oxysterol-binding protein-related protein 3	304	1.53247	0.209858	-2.29185	0.00330861
REEP4	Receptor expression-enhancing protein 4	152	1.89763	6.68092e-05	-2.29127	0.00222109
TUBA1C	Tubulin alpha-1C chain	439	1.29256	0.325208	-2.28992	0.000529815
ASAP1	Arf-GAP with SH3 domain, ANK repeat and PH domain-containing protein 1	839	1.98706	0.0321721	-2.28861	0.0459582
SEC16A	Protein transport protein Sec16A	595	-3.15065	4.21971e-05	-2.28831	1.72119e-06
SEC16A	Protein transport protein Sec16A	593	-3.18038	0.000183349	-2.28831	1.72119e-06
CDK13	Cyclin-dependent kinase 13	439	-1.87576	0.389329	-2.28336	5.86273e-05
CDK13	Cyclin-dependent kinase 13	437	1.04706	0.708412	-2.28336	5.86273e-05
UBE4B	Ubiquitin conjugation factor E4 B	88	-2.95513	0.0769724	-2.28295	N/A
LARP7	La-related protein 7	299	-1.47152	0.32977	-2.28221	0.0021166
LARP7	La-related protein 7	300	-1.47152	0.32977	-2.28221	0.0021166
WAC	WW domain-containing adapter protein with coiled-coil	525	-1.01198	0.98232	-2.2812	0.290717
THRAP3	Thyroid hormone receptor-associated protein 3	243	1.20285	0.115526	-2.2795	0.000791797
USP15	Ubiquitin carboxyl-terminal hydrolase 15	229	-1.0329	0.839296	-2.27819	0.000433155
WRNIP1	ATPase WRNIP1	91	-1.05291	0.850369	-2.27655	0.00871131
FOXK2	Forkhead box protein K2	428	-1.92205	0.00344773	-2.2763	N/A
RIOK1	Serine/threonine-protein kinase RIO1	21	N/A	N/A	-2.27613	0.00141795
RIOK1	Serine/threonine-protein kinase RIO1	22	N/A	N/A	-2.27613	0.00141795
PHAX	Phosphorylated adapter RNA export protein	16	1.01442	0.878843	-2.27579	0.0023182
PHAX	Phosphorylated adapter RNA export protein	18	-1.00796	0.939069	-2.27579	0.0023182
LEO1	RNA polymerase-associated protein LEO1	630	1.20525	0.18058	-2.27527	0.0236867
LEO1	RNA polymerase-associated protein LEO1	629	1.20525	0.18058	-2.27527	0.0236867
RAD23A	UV excision repair protein RAD23 homolog A	133	-3.73462	0.00381279	-2.27475	0.0199098
ZNF106	Zinc finger protein 106	1025	N/A	N/A	-2.27398	0.00320334
ZNF106	Zinc finger protein 106	1026	N/A	N/A	-2.27398	0.00320334
HDAC6	Histone deacetylase 6	22	1.03079	0.797425	-2.27321	1.63231e-05
ZFC3H1	Zinc finger C3H1 domain-containing protein	717	-1.9805	0.00262964	-2.27105	8.41825e-05
ZFC3H1	Zinc finger C3H1 domain-containing protein	719	-1.9805	0.00262964	-2.27105	8.41825e-05
TOP2B	DNA topoisomerase 2-beta	1466	-1.39424	0.585568	-2.27052	0.0206522
MEAF6	Chromatin modification-related protein MEAF6	125	-2.24267	0.00074301	-2.27004	0.00138469
MEAF6	Chromatin modification-related protein MEAF6	124	-2.24267	0.00074301	-2.27004	0.00138469
DAXX	Death domain-associated protein 6	495	-1.22847	0.418016	-2.26995	0.0152112
ARHGAP29	Rho GTPase-activating protein 29	949	1.46918	0.132498	-2.26978	0.00642282
NMD3	60S ribosomal export protein NMD3	468	-1.47059	0.00117021	-2.26941	7.0036e-05
NMD3	60S ribosomal export protein NMD3	470	-1.47059	0.00117021	-2.26941	7.0036e-05
SQSTM1	Sequestosome-1	355	-1.07076	0.60842	-2.26896	0.000998478
C2CD2L	C2 domain-containing protein 2-like	660	-1.0753	0.834566	-2.26693	0.00306927
BAZ2A	Bromodomain adjacent to zinc finger domain protein 2A	1051	-1.42504	N/A	-2.26553	0.000278282
BAZ2A	Bromodomain adjacent to zinc finger domain protein 2A	1050	-1.42504	N/A	-2.26553	0.000278282
KIDINS220	Kinase D-interacting substrate of 220 kDa	1526	1.0889	0.608665	-2.26159	0.00146738
FAM65A	Protein FAM65A	22	1.67045	0.408991	-2.26131	0.0702693
LARP4	La-related protein 4	583	1.26205	0.0757724	-2.261	0.000119241
MAP1B	Microtubule-associated protein 1B;MAP1B heavy chain;MAP1 light chain LC1	1389	1.30848	0.0542424	-2.26043	0.000380036
EIF5B	Eukaryotic translation initiation factor 5B	135	1.79491	0.00413778	-2.25882	0.000339716
EIF5B	Eukaryotic translation initiation factor 5B	137	1.79491	0.00413778	-2.25882	0.000339716
PCM1	Pericentriolar material 1 protein	65	1.37407	0.0272931	-2.25633	0.00372943
DOCK7	Dedicator of cytokinesis protein 7	910	1.07689	N/A	-2.25627	N/A
ITPR3	Inositol 1,4,5-trisphosphate receptor type 3	934	1.3265	0.442125	-2.25375	0.00110862
PTDSS2	Phosphatidylserine synthase 2	24	-2.33184	0.00404549	-2.24868	0.000211486
TCOF1	Treacle protein	1111	-1.12766	0.368202	-2.24703	0.00414005
ZMYND8	Protein kinase C-binding protein 1	490	1.15568	0.676972	-2.24688	0.00247546
CHAMP1	Chromosome alignment-maintaining phosphoprotein 1	651	-3.54703	0.000695686	-2.24574	N/A
CHAMP1	Chromosome alignment-maintaining phosphoprotein 1	652	-3.54703	0.000695686	-2.24574	N/A
CHAMP1	Chromosome alignment-maintaining phosphoprotein 1	653	-3.54703	0.000695686	-2.24574	N/A
RBPJ	Recombining binding protein suppressor of hairless	18	N/A	N/A	-2.2442	0.0149017
MCM2	DNA replication licensing factor MCM2	13	1.33365	0.00755195	-2.24387	0.000168297
NEDD4L	E3 ubiquitin-protein ligase NEDD4-like	475	-2.74486	3.97063e-05	-2.24227	6.97281e-05
NMD3	60S ribosomal export protein NMD3	470	1.35209	0.100188	-2.24211	0.000509474
SMEK1	Serine/threonine-protein phosphatase 4 regulatory subunit 3A	774	-1.53464	0.153175	-2.2421	0.00190561
EPRS	Bifunctional glutamate/proline--tRNA ligase;Glutamate--tRNA ligase;Proline--tRNA ligase	886	-2.20849	N/A	-2.24131	N/A
MCM3	DNA replication licensing factor MCM3	708	-1.19244	0.170081	-2.24121	0.00388912
ACLY	ATP-citrate synthase	481	-1.38386	0.0355038	-2.24011	0.0087902
GPALPP1	GPALPP motifs-containing protein 1	140	-1.4918	0.00948992	-2.23913	0.00234915
GPALPP1	GPALPP motifs-containing protein 1	141	-1.4918	0.00948992	-2.23913	0.00234915
GPALPP1	GPALPP motifs-containing protein 1	138	-1.4918	0.00948992	-2.23913	0.00234915
NFATC2	Nuclear factor of activated T-cells, cytoplasmic 2	856	1.52962	0.0157601	-2.23896	0.0191036
CD3EAP	DNA-directed RNA polymerase I subunit RPA34	488	-1.2413	N/A	-2.23816	N/A
SRRM1	Serine/arginine repetitive matrix protein 1	572	-1.02571	0.92367	-2.23766	0.014383
SRRM1	Serine/arginine repetitive matrix protein 1	574	-1.02571	0.92367	-2.23766	0.014383
FAM129A	Protein Niban	646	N/A	N/A	-2.23448	0.00107041
FAM129A	Protein Niban	641	N/A	N/A	-2.23448	0.00107041
ZC3H4	Zinc finger CCCH domain-containing protein 4	1114	1.34605	0.324512	-2.23397	0.000655458
MATR3	Matrin-3	195	-2.25514	N/A	-2.23358	N/A
SF3B2	Splicing factor 3B subunit 2	311	-1.93606	0.0022318	-2.23075	1.95477e-05
PRMT3	Protein arginine N-methyltransferase 3	25	1.09086	0.651956	-2.22989	0.00575103
PRMT3	Protein arginine N-methyltransferase 3	27	1.09086	0.651956	-2.22989	0.00575103
UTP18	U3 small nucleolar RNA-associated protein 18 homolog	205	-1.72185	3.51559e-05	-2.22935	0.00053581
SNIP1	Smad nuclear-interacting protein 1	52	1.01447	0.951949	-2.22697	0.0100631
UTP18	U3 small nucleolar RNA-associated protein 18 homolog	210	1.55963	0.0211694	-2.22479	0.00372118
KIF3A	Kinesin-like protein KIF3A	687	1.49417	0.253176	-2.21966	0.0032487
ZNF185	Zinc finger protein 185	447	1.04725	0.76944	-2.21932	0.000971656
SSRP1	FACT complex subunit SSRP1	437	-1.00229	N/A	-2.21852	N/A
SCNM1	Sodium channel modifier 1	183	-1.04703	0.831055	-2.21825	0.00347543
LARP7	La-related protein 7	298	N/A	N/A	-2.21803	0.00644869
TNS3	Tensin-3	660	-1.40517	0.0663799	-2.218	N/A
RPLP2	60S acidic ribosomal protein P2	79	1.18459	0.080442	-2.21779	5.71885e-05
NCOR1	Nuclear receptor corepressor 1	2120	-1.00632	0.968072	-2.21725	0.00183394
SMIM13	Small integral membrane protein 13	48	-1.72366	N/A	-2.21657	0.00924517
TFIP11	Tuftelin-interacting protein 11	210	1.27384	0.068488	-2.21634	0.00179741
SFSWAP	Splicing factor, suppressor of white-apricot homolog	283	1.29924	0.312747	-2.21462	0.00187564
ETV3	ETS translocation variant 3	245	1.28604	0.0355603	-2.21416	0.00128818
ETV3	ETS translocation variant 3	250	1.28604	0.0355603	-2.21416	0.00128818
HDAC1	Histone deacetylase 1	393	2.04971	0.137544	-2.21177	0.0989959
ARHGEF26	Rho guanine nucleotide exchange factor 26	392	1.00385	0.984543	-2.2112	0.0243428
PPP1R13L	RelA-associated inhibitor	113	1.18394	0.378301	-2.21037	0.000550242
PPP1R13L	RelA-associated inhibitor	102	1.18394	0.378301	-2.21037	0.000550242
ZC3H13	Zinc finger CCCH domain-containing protein 13	875	-1.2219	0.165274	-2.20919	0.000609389
ZC3H13	Zinc finger CCCH domain-containing protein 13	877	-1.2219	0.165274	-2.20919	0.000609389
SRRM2	Serine/arginine repetitive matrix protein 2	2020	-1.15551	0.143443	-2.20916	5.6592e-05
SRRM2	Serine/arginine repetitive matrix protein 2	2022	-1.15551	0.143443	-2.20916	5.6592e-05
AHNAK	Neuroblast differentiation-associated protein AHNAK	5839	-1.41794	0.771135	-2.20821	0.462396
CDC42BPB	Serine/threonine-protein kinase MRCK beta	1690	2.784	0.0366706	-2.20641	0.0171001
ZNF106	Zinc finger protein 106	861	1.30489	0.094442	-2.20541	0.00291595
PSD4	PH and SEC7 domain-containing protein 4	604	1.13541	0.669775	-2.20439	0.0580593
PSD4	PH and SEC7 domain-containing protein 4	609	1.13541	0.669775	-2.20439	0.0580593
SMARCC2	SWI/SNF complex subunit SMARCC2	283	-1.20535	0.31279	-2.20379	0.0142834
SMARCC2	SWI/SNF complex subunit SMARCC2	286	-1.20535	0.31279	-2.20379	0.0142834
ZNF227	Zinc finger protein 227	6	N/A	N/A	-2.20045	0.00102929
AHNAK	Neuroblast differentiation-associated protein AHNAK	5749	-1.23231	0.0186138	-2.2001	0.00077747
EIF3G	Eukaryotic translation initiation factor 3 subunit G	41	-1.00538	0.966014	-2.19911	0.000677796
RIOK1	Serine/threonine-protein kinase RIO1	21	1.42586	0.0140588	-2.19771	0.000496532
RIOK1	Serine/threonine-protein kinase RIO1	22	1.42586	0.0140588	-2.19771	0.000496532
FAM169A	Soluble lamin-associated protein of 75 kDa	378	1.10971	0.488612	-2.19561	0.25986
FAM169A	Soluble lamin-associated protein of 75 kDa	379	1.10971	0.488612	-2.19561	0.25986
PRRC2C	Protein PRRC2C	2682	-1.23389	0.0777067	-2.19515	N/A
SRRM2	Serine/arginine repetitive matrix protein 2	1413	-1.00447	0.980529	-2.19465	0.0322969
CLUH	Clustered mitochondria protein homolog	664	1.25023	0.24482	-2.19399	0.00339431
TCEAL3	Transcription elongation factor A protein-like 3;Transcription elongation factor A protein-like 6;Transcription elongation factor A protein-like 5	125;125;131	2.22782	0.0029216	-2.19351	0.101516
G3BP1	Ras GTPase-activating protein-binding protein 1	149	1.03258	0.733678	-2.19313	5.70189e-06
MEAF6	Chromatin modification-related protein MEAF6	125	-1.89943	0.00850056	-2.19144	0.000103505
MEAF6	Chromatin modification-related protein MEAF6	124	-1.89943	0.00850056	-2.19144	0.000103505
UBR5	E3 ubiquitin-protein ligase UBR5	1549	3.86492	5.95279e-06	-2.18973	0.193301
SRRM2	Serine/arginine repetitive matrix protein 2	846	-2.38081	N/A	-2.18939	0.0107462
EIF5B	Eukaryotic translation initiation factor 5B	183	-3.13738	3.4317e-06	-2.18886	0.00110833
EIF5B	Eukaryotic translation initiation factor 5B	186	-3.13738	3.4317e-06	-2.18886	0.00110833
EIF5B	Eukaryotic translation initiation factor 5B	190	-3.13738	3.4317e-06	-2.18886	0.00110833
EIF5B	Eukaryotic translation initiation factor 5B	182	-3.13738	3.4317e-06	-2.18886	0.00110833
EIF4EBP1	Eukaryotic translation initiation factor 4E-binding protein 1	37	1.34874	0.00540552	-2.18716	8.84677e-05
NRD1	Nardilysin	94	1.90148	0.227635	-2.18601	0.0139617
UTP14A	U3 small nucleolar RNA-associated protein 14 homolog A	405	-1.27976	0.0738976	-2.18525	6.8722e-05
UTP14A	U3 small nucleolar RNA-associated protein 14 homolog A	407	-1.27976	0.0738976	-2.18525	6.8722e-05
AHNAK	Neuroblast differentiation-associated protein AHNAK	5790	-1.39626	0.117937	-2.18448	0.0327505
AHNAK2	Protein AHNAK2	4418	-1.13193	0.0402846	-2.18378	0.0316513
VIM	Vimentin	299	1.13624	0.37961	-2.18198	0.000296946
SRP72	Signal recognition particle subunit SRP72	625	1.14152	N/A	-2.1817	N/A
MAP1B	Microtubule-associated protein 1B;MAP1B heavy chain;MAP1 light chain LC1	1427	1.4045	0.00728853	-2.18065	0.000146105
RALGPS2	Ras-specific guanine nucleotide-releasing factor RalGPS2	329	1.08885	0.740423	-2.18053	0.175062
RALGPS2	Ras-specific guanine nucleotide-releasing factor RalGPS2	326	1.08885	0.740423	-2.18053	0.175062
KPNA3	Importin subunit alpha-4	60	1.26737	0.075416	-2.17996	0.000201489
TTLL12	Tubulin--tyrosine ligase-like protein 12	16	2.01016	0.0125615	-2.17879	0.0101168
MCM3	DNA replication licensing factor MCM3	713	-1.24144	N/A	-2.17831	N/A
KMT2C	Histone-lysine N-methyltransferase 2C	2946	-2.16983	N/A	-2.17757	N/A
SMARCA4	Transcription activator BRG1	1452	1.1282	0.455188	-2.17703	0.00266567
SURF2	Surfeit locus protein 2	190	1.1186	0.415156	-2.17692	5.34863e-06
TCEA1	Transcription elongation factor A protein 1	100	-1.37588	0.0338625	-2.17602	0.000437783
TOX4	TOX high mobility group box family member 4	178	-2.18945	0.00414412	-2.17579	0.000680283
MARCKS	Myristoylated alanine-rich C-kinase substrate	77	N/A	N/A	-2.1757	0.00633454
SRRM1	Serine/arginine repetitive matrix protein 1	874	-1.23637	0.25216	-2.17499	0.000159275
SRRM1	Serine/arginine repetitive matrix protein 1	872	-1.23637	0.25216	-2.17499	0.000159275
RBBP6	E3 ubiquitin-protein ligase RBBP6	1648	N/A	N/A	-2.17499	N/A
RABGAP1	Rab GTPase-activating protein 1	42	2.59019	0.00202793	-2.17434	0.190126
ZC3HC1	Nuclear-interacting partner of ALK	335	-1.44238	0.0179896	-2.17388	N/A
PLEC	Plectin	4386	-1.43665	0.79367	-2.17263	0.62558
TVP23B	Golgi apparatus membrane protein TVP23 homolog B;Golgi apparatus membrane protein TVP23 homolog C	6;6	-1.28739	0.0706747	-2.1724	8.90348e-05
ACIN1	Apoptotic chromatin condensation inducer in the nucleus	216	2.82318	0.00951823	-2.17184	0.0640147
TOM1L1	TOM1-like protein 1	323	1.54785	0.00516396	-2.17141	0.00376085
KMT2A	Histone-lysine N-methyltransferase 2A;MLL cleavage product N320;MLL cleavage product C180	1837	-2.19444	1.92515e-06	-2.17022	1.26118e-05
CLIP1	CAP-Gly domain-containing linker protein 1	200	1.26151	0.0262368	-2.16914	0.0288203
KLC2	Kinesin light chain 2	582	1.98088	0.0048979	-2.16894	0.000704304
ARHGEF11	Rho guanine nucleotide exchange factor 11	1461	-1.44018	0.607369	-2.16807	0.309597
DIS3L2	DIS3-like exonuclease 2	875	-1.37803	0.401356	-2.16783	0.115338
STAMBPL1	AMSH-like protease	242	-1.55874	0.26679	-2.16738	N/A
RELL1	RELT-like protein 1	261	1.90556	N/A	-2.16675	N/A
SUPT6H	Transcription elongation factor SPT6	73	-3.17987	3.20016e-06	-2.16609	0.000304783
SUPT6H	Transcription elongation factor SPT6	75	-3.17987	3.20016e-06	-2.16609	0.000304783
SUPT6H	Transcription elongation factor SPT6	78	-3.17987	3.20016e-06	-2.16609	0.000304783
[truncated: 504 more rows]
